# Supplementary material for: Functional group engineering in naphthalimides: a conceptual insight to fine-tune the supramolecular self-assembly and condensed state luminescence
Source: Royal Society of Chemistry journal article supplement (doi:10.1039/c9nr04593g), 2019-01-01
Supplement: c9nr04593g1.pdf [file c9nr04593g1.pdf]

Electronic Supplementary Information

**Functional group engineering in naphthalimides: a conceptual insight to fine-tune the supramolecular self-assembly and condensed state luminescence**

*Niranjan Meher,<sup>a</sup> and Parameswar Krishnan Iyer<sup>\*a,b</sup>*

<sup>a</sup>Department of Chemistry, <sup>b</sup>Center for Nanotechnology, Indian Institute of Technology Guwahati, Guwahati-781039, Assam, India

\*AUTHOR INFORMATION (P. K. Iyer)

*E-mail: [pki@iitg.ac.in](mailto:pki@iitg.ac.in);*

*Fax: [+91 361 258 2349](tel:+913612582349)*

## Experimental Methods

**Materials and Instrumentations:** All starting materials and reagents (viz: 1,8-naphthalic anhydride, 4-bromo-1,8-naphthalic anhydride, hexylamine and phenylboronic acid derivatives) were purchased from Sigma Aldrich (INDIA) and were of reagent grade. HPLC grade solvents used in this study were purchased from Fisher Scientific Ltd. and RANKEM. NMR ( $^1\text{H}$ ,  $^{13}\text{C}$ ) spectra were recorded with a Bruker Avance 600 MHz spectrometer. All solutions for  $^1\text{H}$  and  $^{13}\text{C}$  spectra were obtained taking residual solvent signal as internal reference. Electro spray ionization mass spectrometry (ESI-MS) was recorded on a Waters (Micro mass MS-Technologies) Q-ToF MS Analyzer spectrometer. Microbalance ( $\pm 0.1\text{mg}$ ) and volumetric glassware were used for the preparation of solutions. UV/vis and PL spectra were recorded on a Perkin-Elmer Model Lambda-750 spectrophotometer and a Horiba Fluoromax-4 spectrofluorometer respectively using 4 mm quartz cuvettes at 298 K. Life-time measurements were performed using a time-correlated single photon counting set up from Horiba. The laser diode 375 (DeltaDiode-375) was used as a source with excitation wavelength of 375 nm. Malvern Zetasizer instrument was used to measure the hydrodynamic diameter of the compounds. Field emission scanning electron microscopy (FESEM) images were obtained on Sigma Carl ZEISS field emission scanning electron microscope. X-ray diffraction (XRD) measurements were performed using Bruker D2 PHASER X-ray diffractometer (10 mA, 30 kV) equipped with Ni-filtered Cu K $\alpha$  radiation, at a wavelength of 0.154 nm. The samples were scanned in the  $2\theta$  range of 5–50° at a scan rate of 1.2° min $^{-1}$ . Single crystal data were obtained with a Bruker SMART APEX diffractometer equipped with a CCD area detector.

**Preparation of the Test Solution:** Stock solutions of probes **1-15** and **HNI** ( $1\times 10^{-5}$  M) was prepared in DMF, while stock solutions of various test species ( $1\times 10^{-5}$  M) were prepared by dissolving an appropriate amount of the testing species in methanol. The test solutions of the probes (10  $\mu\text{M}$ ) were prepared at different water fraction in DMF for aggregation study. The probe (10  $\mu\text{M}$ ) nanoaggregate suspension in 99.9% water was prepared for the titration study with various analytes. The resulting solution was shaken well at room temperature before recording the spectra.

**Preparation of FESEM samples:** The morphological analysis of the supramolecular self-assembly was carried out by FE-SEM. As pictured in Figure 5q, simple methodology was

performed to prepare the samples. The dilute suspension of the naphthalimide congeners (10  $\mu$ M) in 99.9% water-0.1% DMF were drop casted on aluminium foil coated glass surface and were dried in room temperature overnight before analysis.

**Theoretical Studies:** To investigate the non-fluorescent nature of **15** in both solution and condensed state, the electronic properties of all the congeners along with various other small molecules were calculated using density functional theory (DFT). The ground state and excited state optimized geometries along with HOMO/LUMO electron density and energy were calculated using B3LYP hybrid functional incorporated in the Gaussian 09 package.<sup>1,2</sup> The 6-31G(d) basis set for all the atoms has been used in all calculations, which offers high quality outcomes at a reasonable time.

**Quantum Yield Calculations:** Fluorescence quantum yields ( $\Phi_s$ ) of the naphthalimides were calculated by taking quinine sulfate ( $\Phi_r = 0.57$  in 0.1 M H<sub>2</sub>SO<sub>4</sub>) as standard and using the equation shown below:

$$\Phi_s = \Phi_r (A_r F_s / A_s F_r) (\eta_s^2 / \eta_r^2)$$

Where, s and r represent sample and reference,  $\Phi$  signifies the quantum yield, A denotes absorbance, F signifies relative integrated fluorescence intensity, and  $\eta$  represents the refractive index of the medium.

### Synthetic route

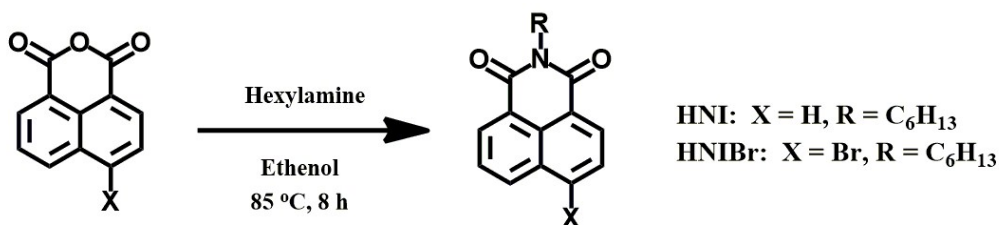

**Scheme S1.** The synthetic procedure used to prepare probe **HNI** and **HNI-Br**.

**Synthetic Procedure for HNI and HNIBr:** 1,8-naphthalic anhydride (5 m.mol) was taken in ethanol (20 mL) and hexylamine (5.2 m.mol) was added to it drop wise at room temperature. The suspension was heated at 85 °C with vigorous stirring for 12h. Then the mixture was cooled to room temperature and then kept at 5 °C for 1 h to recrystallize **HNI**. The solvent was filtered out and the HNI residue was washed with ethanol to get the pure light brown crystalline solid of HNI (84% yield). Similar synthetic procedure was followed for **HNIBr** (4-bromo-1,8-naphthalic anhydride was taken in place 1,8-naphthalic anhydride) yielding a light green color solid with 81% yield.

**Characterization data of HNI:**  $^1\text{H}$  NMR (600 MHz,  $\text{CDCl}_3$ ,  $\delta$  ppm) 0.91 (t, 3H), 1.35 (m, 4H), 1.44 (m, 2H), 1.75 (m, 2H), 4.19 (t, 2H), 7.77 (t, 2H), 8.22 (d, 2H), 8.61 (d, 2H).  $^{13}\text{C}$  NMR (150.00 MHz,  $\text{CDCl}_3$ ,  $\delta$  ppm) 14.22, 22.71, 26.94, 28.20, 31.70, 40.63, 122.85, 127.04, 128.24, 131.29, 131.67, 133.96, 164.32. HRMS (+ESI): Calculated for  $\text{C}_{18}\text{H}_{19}\text{NO}_2$  281.1416  $[\text{M}]^+$ , Found 282.1371  $[\text{M}+1]^+$ .

**Characterization data of HNIBr:**  $^1\text{H}$  NMR (600 MHz,  $\text{CDCl}_3$ ,  $\delta$  ppm) 0.87 (t, 3H), 1.32 (m, 6H), 1.70 (m, 2H), 4.12 (t, 2H) 7.77 (t, 1H), 7.95 (d, 1H), 8.32 (d, 1H), 8.46 (d, 1H), 8.57 (d, 1H).  $^{13}\text{C}$  NMR (150.00 MHz,  $\text{CDCl}_3$ ,  $\delta$  ppm) 14.18, 22.68, 26.89, 28.11, 31.64, 40.71, 122.28, 123.14, 128.09, 128.91, 130.17, 130.54, 131.09, 131.18, 131.99, 133.15, 163.54, 163.56. HRMS (+ESI): Calculated for  $\text{C}_{18}\text{H}_{18}\text{BrNO}_2$  359.0521  $[\text{M}]^+$ , 361.0500  $[\text{M}+2]^+$ , Found 360.0600  $[\text{M}+\text{H}]^+$ , 362.0581  $[\text{M}+\text{H}+2]^+$ .

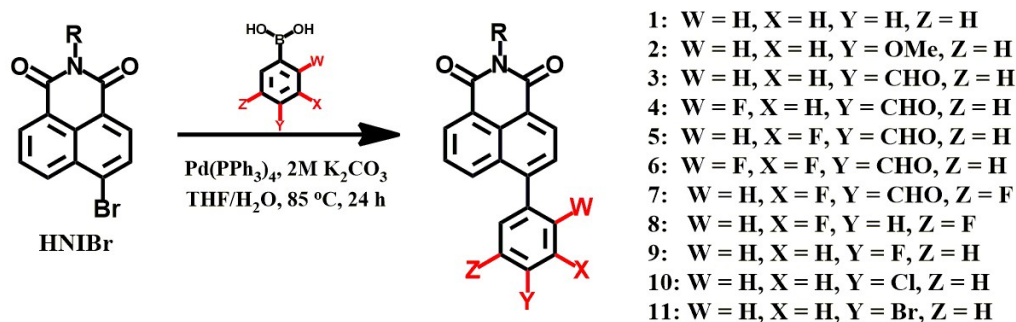

**Scheme S2.** The synthetic procedure used to prepare probe **1** to **11**.

**Synthetic Procedure for 1 to 11:** Compound **HNIBr** (0.5 m.mol) and the respective boronic acid (1 m.mol) were dissolved into 6 mL of THF in 50 ml round bottom flask, and then 2 mL of 2.0 M potassium carbonate solution was added to the flask. The mixture solutions was degassed with nitrogen for 15 min and then 5 mg of catalyst Pd(PPh<sub>3</sub>)<sub>4</sub> was added to them. The mixtures were stirred at 85 °C under nitrogen atmosphere and the progress of reactions was monitored by taking TLC. After 15 h, the solutions were cooled and extracted with CHCl<sub>3</sub>. The organic layers were dried over anhydrous sodium sulfate. The solvent was removed and were purified by column chromatography.

**Characterization data for 1:** <sup>1</sup>H NMR (600 MHz, CDCl<sub>3</sub>, δ ppm) 0.90 (t, 3H), 1.34 (m, 4H), 1.45 (m, 2H), 1.75 (m, 2H), 4.20 (t, 2H) 7.53 (m, 5H), 7.70 (m, 2H), 8.26 (d, 1H), 8.64 (t, 2H). <sup>13</sup>C NMR (150.00 MHz, CDCl<sub>3</sub>, δ ppm) 14.22, 22.72, 26.96, 28.23, 31.72, 40.67, 121.94, 123.06, 126.95, 127.97, 128.59, 128.79, 130.01, 130.18, 130.93, 131.28, 132.73, 138.97, 146.97, 164.27, 164.47. HRMS (+ESI): Calculated for C<sub>24</sub>H<sub>23</sub>NO<sub>2</sub> 357.1729 [M]<sup>+</sup>, Found 358.1806 [M+H]<sup>+</sup>.

**Characterization data for 2:** <sup>1</sup>H NMR (600 MHz, CDCl<sub>3</sub>, δ ppm) 0.89 (t, 3H), 1.35 (m, 4H), 1.44 (m, 2H), 1.75 (m, 2H), 3.92 (s, 3H), 4.20 (t, 2H) 7.08 (d, 2H), 7.45 (d, 2H), 7.68 (m, 2H), 8.30 (d, 1H), 8.62 (d, 2H). <sup>13</sup>C NMR (150.00 MHz, CDCl<sub>3</sub>, δ ppm) 14.22, 22.73, 26.96, 28.23, 31.72, 40.66, 55.59, 114.29, 114.92, 116.15, 121.54, 123.06, 126.82, 127.89, 130.30, 131.00, 131.27, 132.84, 146.80, 160.04, 164.33, 164.53. HRMS (+ESI): Calculated for C<sub>25</sub>H<sub>25</sub>NO<sub>3</sub> 387.1834 [M]<sup>+</sup>, Found 388.1963 [M+H]<sup>+</sup>.

**Characterization data for 3:** <sup>1</sup>H NMR (600 MHz, CDCl<sub>3</sub>, δ ppm) 0.89 (t, 3H), 1.34 (m, 4H), 1.43 (m, 2H), 1.74 (m, 2H), 4.19 (t, 2H) 7.71 (m, 4H), 8.07 (d, 2H), 8.17 (d, 1H), 8.66 (t, 2H), 10.15 (s, 1H). <sup>13</sup>C NMR (150.00 MHz, CDCl<sub>3</sub>, δ ppm) 14.10, 22.68, 26.91, 28.17, 31.66, 40.69, 122.71, 123.19, 127.37, 127.92, 128.71, 129.77, 129.97, 130.16, 130.60, 130.89, 131.32, 131.57, 132.09, 136.22, 145.04, 145.17, 163.97, 164.18, 191.76. HRMS (+ESI): Calculated for C<sub>25</sub>H<sub>23</sub>NO<sub>3</sub> 385.1678 [M]<sup>+</sup>, Found 386.1839 [M+H]<sup>+</sup>.

**Characterization data for 4:** <sup>1</sup>H NMR (600 MHz, CDCl<sub>3</sub>, δ ppm) 0.89 (t, 3H), 1.35 (m, 4H), 1.42 (m, 2H), 1.74 (m, 2H), 4.20 (t, 2H) 7.63 (t, 1H), 7.74 (m, 2H), 7.76 (d, 1H), 7.79 (d, 1H), 7.87 (d, 1H), 8.67 (m, 2H), 10.11 (d, 1H). <sup>13</sup>C NMR (150.00 MHz, CDCl<sub>3</sub>, δ ppm) 14.22, 22.72, 26.95, 28.22, 31.70, 40.76, 116.26, 116.41, 123.27, 127.58, 128.70, 130.62, 131.59, 131.76,

132.99, 138.70, 138.74, 139.01, 159.38, 161.04, 163.97, 164.17, 190.43.  $^{19}\text{F}$  NMR (564.00 MHz, DMSO- $d_6$ ,  $\delta$  ppm) -112.76. HRMS (+ESI): Calculated for  $\text{C}_{25}\text{H}_{22}\text{FNO}_3$  403.1584  $[\text{M}]^+$ , Found 404.1640  $[\text{M}+\text{H}]^+$ .

**Characterization data for 5:**  $^1\text{H}$  NMR (600 MHz,  $\text{CDCl}_3$ ,  $\delta$  ppm) 0.88 (t, 3H), 1.32 (m, 4H), 1.41 (m, 2H), 1.74 (m, 2H), 4.19 (t, 2H) 7.36 (d, 1H), 7.43 (d, 1H), 7.70 (d, 1H), 7.74 (t, 1H), 8.06 (t, 1H), 8.17 (d, 1H), 8.66 (d, 2H), 10.48 (s, 1H).  $^{13}\text{C}$  NMR (150.00 MHz,  $\text{CDCl}_3$ ,  $\delta$  ppm) 14.20, 22.71, 26.93, 28.20, 31.69, 40.77, 118.12, 118.26, 123.32, 127.68, 127.88, 129.18, 129.20, 129.54, 130.70, 131.62, 143.77, 147.33, 147.39, 163.71, 163.90, 164.13, 165.44, 186.70, 186.74.  $^{19}\text{F}$  NMR (564.00 MHz, DMSO- $d_6$ ,  $\delta$  ppm) -120.07. HRMS (+ESI): Calculated for  $\text{C}_{25}\text{H}_{22}\text{FNO}_3$  403.1584  $[\text{M}]^+$ , Found 404.1649  $[\text{M}+\text{H}]^+$ .

**Characterization data for 6:**  $^1\text{H}$  NMR (600 MHz,  $\text{CDCl}_3$ ,  $\delta$  ppm) 0.90 (t, 3H), 1.33 (m, 4H), 1.43 (m, 2H), 1.75 (m, 2H), 4.20 (t, 2H) 7.34 (t, 1H), 7.75 (m, 2H), 7.77 (t, 1H), 7.96 (d, 1H), 8.68 (m, 2H), 10.47 (s, 1H).  $^{13}\text{C}$  NMR (150.00 MHz,  $\text{CDCl}_3$ ,  $\delta$  ppm) 14.22, 22.72, 26.95, 28.22, 31.70, 40.80, 123.34, 123.37, 123.83, 125.96, 126.00, 126.97, 126.99, 127.83, 128.58, 128.72, 129.76, 130.56, 131.72, 134.51, 137.68, 163.85, 164.07, 185.70.  $^{19}\text{F}$  NMR (564.00 MHz, DMSO- $d_6$ ,  $\delta$  ppm) -144.83 (d), -138.63 (d). HRMS (+ESI): Calculated for  $\text{C}_{25}\text{H}_{21}\text{F}_2\text{NO}_3$  421.1489  $[\text{M}]^+$ , Found 422.1563  $[\text{M}+\text{H}]^+$ .

**Characterization data for 7:**  $^1\text{H}$  NMR (600 MHz,  $\text{CDCl}_3$ ,  $\delta$  ppm) 0.89 (t, 3H), 1.34 (m, 4H), 1.44 (m, 2H), 1.74 (m, 2H), 4.19 (t, 2H) 7.18 (d, 2H), 7.70 (d, 1H), 7.78 (d, 1H), 8.17 (d, 1H), 8.67 (t, 2H), 10.45 (s, 1H).  $^{13}\text{C}$  NMR (150.00 MHz,  $\text{CDCl}_3$ ,  $\delta$  ppm) 14.21, 22.71, 26.93, 28.20, 31.69, 40.82, 114.21, 114.24, 114.35, 114.38, 123.44, 123.61, 127.81, 127.97, 128.74, 129.27, 13.63, 131.20, 131.76, 142.54, 147.51, 163.78, 164.03, 184.12.  $^{19}\text{F}$  NMR (564.00 MHz, DMSO- $d_6$ ,  $\delta$  ppm) -144.85. (d). HRMS (+ESI): Calculated for  $\text{C}_{25}\text{H}_{21}\text{F}_2\text{NO}_3$  421.1489  $[\text{M}]^+$ , Found 422.5724  $[\text{M}+\text{H}]^+$ .

**Characterization data for 8:**  $^1\text{H}$  NMR (600 MHz,  $\text{CDCl}_3$ ,  $\delta$  ppm) 0.89 (t, 3H), 1.34 (m, 4H), 1.44 (m, 2H), 1.74 (m, 2H), 4.19 (t, 2H), 6.98 (t, 1H) 7.04 (d, 2H), 7.68 (d, 1H), 7.75 (t, 1H), 8.20 (d, 1H), 8.65 (t, 2H).  $^{13}\text{C}$  NMR (150.00 MHz,  $\text{CDCl}_3$ ,  $\delta$  ppm) 14.22, 22.73, 26.95, 28.22, 31.71, 40.76, 104.20 (d), 113.18 (dd), 122.88, 123.27, 127.52, 127.87, 128.74, 129.74, 130.75, 131.55, 131.85, 142.07, 144.11, 162.34, 164.01, 164.24.  $^{19}\text{F}$  NMR (564.00 MHz, DMSO- $d_6$ ,  $\delta$

ppm) -109.10. HRMS (+ESI): Calculated for  $C_{24}H_{21}F_2NO_2$  393.1540  $[M]^+$ , Found 394.1611  $[M+H]^+$ .

**Characterization data for 9:**  $^1H$  NMR (600 MHz,  $CDCl_3$ ,  $\delta$  ppm) 0.90 (t, 3H), 1.34 (m, 4H), 1.44 (m, 2H), 1.75 (m, 2H), 4.20 (t, 2H), 7.013 (t, 1H) 7.25 (m, 2H), 7.48 (t, 1H), 7.67 (d, 1H), 7.71 (t, 1H), 8.21 (d, 1H), 8.64 (t, 2H).  $^{13}C$  NMR (150.00 MHz,  $CDCl_3$ ,  $\delta$  ppm) 14.22, 22.73, 26.96, 28.24, 31.73, 40.70, 114.21, 115.75, 115.84, 115.89, 115.98, 123.17, 127.12, 128.05, 130.89, 131.36, 131.67, 131.72, 132.40, 139.43, 145.79, 164.20, 164.40.  $^{19}F$  NMR (564.00 MHz,  $DMSO-d_6$ ,  $\delta$  ppm) -113.48. HRMS (+ESI): Calculated for  $C_{24}H_{22}FNO_2$  375.1635  $[M]^+$ , Found 376.1726  $[M+H]^+$ .

**Characterization data for 10:**  $^1H$  NMR (600 MHz,  $CDCl_3$ ,  $\delta$  ppm) 0.90 (t, 3H), 1.34 (m, 4H), 1.44 (m, 2H), 1.75 (m, 2H), 4.20 (t, 2H), 7.44 (d, 2H) 7.53 (d, 2H), 7.67 (d, 1H), 7.71 (t, 1H), 8.20 (dd, 1H), 8.64 (d, 2H).  $^{13}C$  NMR (150.00 MHz,  $CDCl_3$ ,  $\delta$  ppm) 14.22, 22.73, 26.96, 28.23, 31.72, 40.72, 122.31, 123.19, 127.20, 127.95, 129.10, 130.06, 130.88, 131.29, 131.41, 132.28, 134.92, 137.37, 145.54, 164.16, 164.37. HRMS (+ESI): Calculated for  $C_{24}H_{22}ClNO_2$  391.1339  $[M]^+$ , Found 391.1594  $[M+H]^+$ .

**Characterization data for 11:**  $^1H$  NMR (600 MHz,  $CDCl_3$ ,  $\delta$  ppm) 0.89 (t, 3H), 1.34 (m, 4H), 1.44 (m, 2H), 1.74 (m, 2H), 4.19 (t, 2H), 7.38 (d, 2H) 7.68 (m, 2H), 8.19 (d, 1H), 8.63 (d, 2H).  $^{13}C$  NMR (150.00 MHz,  $CDCl_3$ ,  $\delta$  ppm) 14.22, 22.72, 26.95, 28.22, 31.72, 40.71, 114.21, 123.08, 127.20, 127.88, 128.80, 129.97, 130.87, 131.41, 131.57, 132.04, 132.26, 137.84, 145.53, 164.15, 164.35. HRMS (+ESI): Calculated for  $C_{24}H_{22}BrNO_2$  435.0834  $[M]^+$ , Found 436.0912  $[M+H]^+$ .

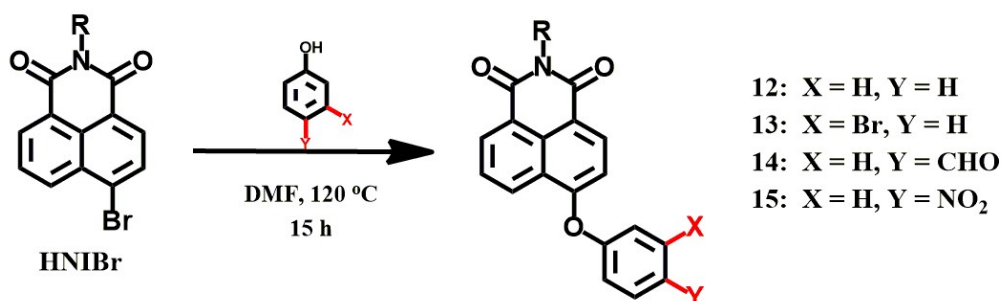

**Scheme S3.** The synthetic procedure used to prepare probe **12** to **15**.

**Synthetic Procedure for 12 to 15:** To a solution of **HNIBr** (0.5 mmol) in DMF (10 mL), 0.7 mmol of the respective phenol derivative and  $K_2CO_3$  (300 mg) were added and the mixture was vigorously stirred and heated at 130 °C for 15 hours. The solvent was evaporated under vacuum and residue extracted with chloroform (40×5 mL). The organic layer was washed with  $H_2O$  several times followed by brine, dried over anhydrous  $Na_2SO_4$  and concentrated under reduced pressure to get crude product that was purified by silica gel column chromatography increasing the polarity slowly using mixture of hexane and chloroform to get the pure products.

**Characterization data for 12:**  $^1H$  NMR (600 MHz,  $CDCl_3$ ,  $\delta$  ppm) 0.89 (t, 3H), 1.34 (m, 4H), 1.44 (m, 2H), 1.74 (m, 2H), 4.17 (t, 2H), 6.91 (d, 1H), 7.19 (d, 2H), 7.31 (t, 1H), 7.48 (t, 2H), 7.78 (dd, 1H), 8.45 (d, 1H), 8.68 (m, 2H).  $^{13}C$  NMR (150.00 MHz,  $CDCl_3$ ,  $\delta$  ppm) 14.22, 22.72, 26.96, 28.25, 31.72, 40.58, 110.76, 116.81, 120.91, 122.83, 124.09, 125.71, 126.63, 128.67, 129.83, 130.54, 132.00, 132.91, 155.00, 159.97, 163.92, 164.54. HRMS (+ESI): Calculated for  $C_{24}H_{23}NO_3$  373.1678  $[M]^+$ , Found 394.1768  $[M+H]^+$ .

**Characterization data for 13:**  $^1H$  NMR (600 MHz,  $CDCl_3$ ,  $\delta$  ppm) 0.89 (t, 3H), 1.34 (m, 4H), 1.44 (m, 2H), 1.74 (m, 2H), 4.17 (t, 2H), 6.98 (d, 1H), 7.12 (d, 1H), 7.34 (m, 2H), 7.42 (d, 1H), 7.79 (t, 1H), 8.49 (d, 1H), 8.62 (d, 1H), 8.66 (d, 1H).  $^{13}C$  NMR (150.00 MHz,  $CDCl_3$ ,  $\delta$  ppm) 14.22, 22.72, 26.95, 28.24, 31.72, 40.62, 111.63, 117.61, 119.29, 122.94, 123.51, 123.98, 124.15, 126.91, 128.42, 128.70, 129.84, 131.58, 132.12, 132.73, 156.01, 158.99, 163.78, 164.43. HRMS (+ESI): Calculated for  $C_{24}H_{22}BrNO_3$  451.0783  $[M]^+$ , Found 452.0861  $[M+H]^+$ .

**Characterization data for 14:**  $^1H$  NMR (600 MHz,  $CDCl_3$ ,  $\delta$  ppm) 0.89 (t, 3H), 1.34 (m, 4H), 1.44 (m, 2H), 1.74 (m, 2H), 4.18 (t, 2H), 7.13 (d, 1H), 7.27 (m, 2H), 7.79 (t, 1H), 7.98 (d, 2H), 8.55 (m, 2H), 8.67 (d, 1H), 10.01 (s, 1H).  $^{13}C$  NMR (150.00 MHz,  $CDCl_3$ ,  $\delta$  ppm) 14.22, 22.73, 26.95, 28.24, 31.71, 40.68, 113.65, 118.61, 119.92, 123.10, 124.63, 127.20, 128.32, 129.95, 132.23, 132.39, 132.53, 133.23, 157.69, 161.04, 163.68, 164.29, 190.70. HRMS (+ESI): Calculated for  $C_{24}H_{23}NO_4$  401.1627  $[M]^+$ , Found 402.1759  $[M+H]^+$ .

**Characterization data for 15:**  $^1H$  NMR (600 MHz,  $CDCl_3$ ,  $\delta$  ppm) 0.89 (t, 3H), 1.34 (m, 4H), 1.44 (m, 2H), 1.74 (m, 2H), 4.18 (t, 2H), 7.19 (d, 1H), 7.23 (d, 2H), 7.80 (dd, 1H), 8.32 (d, 2H), 8.49 (d, 1H), 8.56 (d, 1H), 8.68 (t, 1H).  $^{13}C$  NMR (150.00 MHz,  $CDCl_3$ ,  $\delta$  ppm) 14.21, 22.72, 26.94, 28.23, 32.07, 40.71, 114.34, 119.38, 123.19, 124.66, 126.48, 127.44, 128.08, 129.97, 132.32, 132.40, 139.43, 144.38, 156.97, 161.37, 163.55, 164. HRMS (+ESI): Calculated for  $C_{24}H_{22}BrNO_3$  418.1529  $[M]^+$ , Found 419.1665  $[M+H]^+$ .



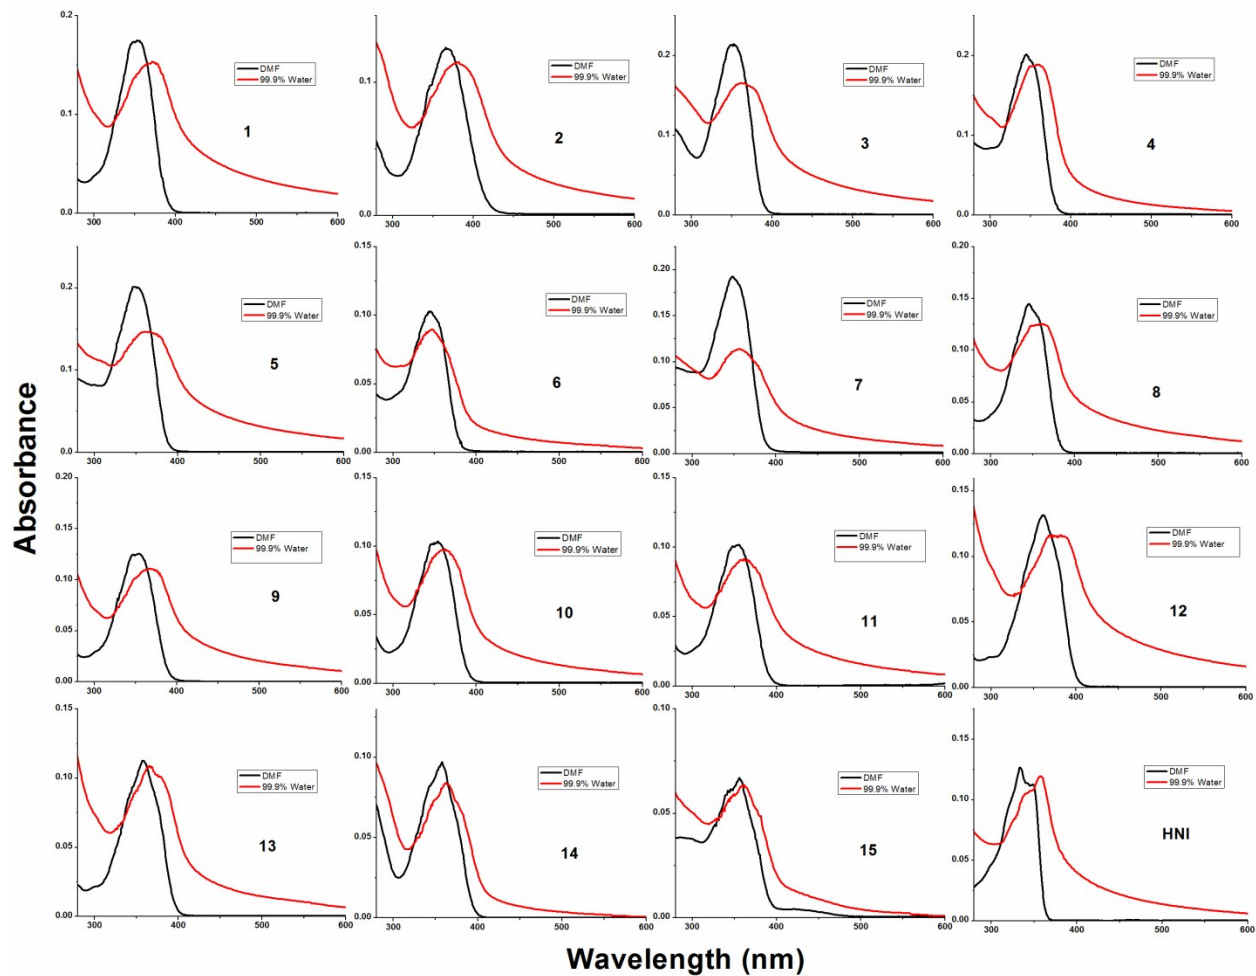

**Figure S1.** Absorption spectra of **1-15** and **HNI** in DMF and at 99.9% water fraction in DMF (at 25 °C, 10  $\mu$ M).

**Table S1.** Photophysical data for the naphthalimide congeners (**1-15** and **HNI**)

| <b>Compound</b> | <b>Solvent<sup>[a]</sup></b> | <b><math>\lambda_{abs.max}</math> (nm)</b> | <b>A</b> | <b><math>\lambda_{em.max}</math> (nm)</b> | <b><math>\Phi_{FL}</math><sup>[b]</sup></b> |
|-----------------|------------------------------|--------------------------------------------|----------|-------------------------------------------|---------------------------------------------|
| 1               | 0%                           | 353                                        | 0.17455  | 426                                       | 0.118                                       |
| 1               | 50%                          | 359                                        | 0.18166  | 443                                       | 0.122                                       |
| 1               | 99.9%                        | 372                                        | 0.15220  | 460                                       | 0.019                                       |
| 2               | 0%                           | 368                                        | 0.11020  | 491                                       | 0.655                                       |
| 2               | 50%                          | 374                                        | 0.13110  | 521                                       | 0.114                                       |
| 2               | 99.9%                        | 381                                        | 0.11543  | 463                                       | 0.304                                       |
| 3               | 0%                           | 350                                        | 0.21420  | 423                                       | 0.028                                       |
| 3               | 50%                          | 354                                        | 0.21704  | 430                                       | 0.088                                       |
| 3               | 99.9%                        | 362                                        | 0.16463  | 450                                       | 0.062                                       |
| 4               | 0%                           | 347                                        | 0.20255  | 413                                       | 0.013                                       |
| 4               | 50%                          | 352                                        | 0.20539  | 421                                       | 0.047                                       |
| 4               | 99.9%                        | 362                                        | 0.18934  | 433                                       | 0.025                                       |
| 5               | 0%                           | 348                                        | 0.20211  | 423                                       | 0.022                                       |
| 5               | 50%                          | 352                                        | 0.20776  | 431                                       | 0.069                                       |
| 5               | 99.9%                        | 361                                        | 0.14708  | 434                                       | 0.047                                       |
| 6               | 0%                           | 347                                        | 0.10352  | 417                                       | 0.031                                       |
| 6               | 50%                          | 345                                        | 0.10855  | 420                                       | 0.072                                       |
| 6               | 99.9%                        | 347                                        | 0.08998  | 444                                       | 0.038                                       |
| 7               | 0%                           | 349                                        | 0.19361  | 433                                       | 0.034                                       |
| 7               | 50%                          | 350                                        | 0.19989  | 427                                       | 0.045                                       |
| 7               | 99.9%                        | 356                                        | 0.11397  | 432                                       | 0.012                                       |
| 8               | 0%                           | 347                                        | 0.14628  | 410                                       | 0.019                                       |
| 8               | 50%                          | 348                                        | 0.14956  | 424                                       | 0.041                                       |
| 8               | 99.9%                        | 366                                        | 0.12658  | 450                                       | 0.019                                       |
| 9               | 0%                           | 354                                        | 0.12579  | 426                                       | 0.796                                       |
| 9               | 50%                          | 358                                        | 0.13033  | 448                                       | 0.927                                       |
| 9               | 99.9%                        | 366                                        | 0.11103  | 460                                       | 0.057                                       |
| 10              | 0%                           | 354                                        | 0.10327  | 425                                       | 0.657                                       |
| 10              | 50%                          | 354                                        | 0.10831  | 447                                       | 0.873                                       |
| 10              | 99.9%                        | 364                                        | 0.09815  | 459                                       | 0.179                                       |
| 11              | 0%                           | 354                                        | 0.10217  | 426                                       | 0.465                                       |
| 11              | 50%                          | 355                                        | 0.10632  | 444                                       | 0.599                                       |
| 11              | 99.9%                        | 364                                        | 0.09043  | 452                                       | 0.183                                       |
| 12              | 0%                           | 357                                        | 0.13058  | 431                                       | 0.130                                       |
| 12              | 50%                          | 362                                        | 0.13412  | 439                                       | 0.010                                       |
| 12              | 99.9%                        | 385                                        | 0.11644  | 472                                       | 0.151                                       |
| 13              | 0%                           | 356                                        | 0.11379  | 426                                       | 0.768                                       |
| 13              | 50%                          | 359                                        | 0.11796  | 436                                       | 0.119                                       |
| 13              | 99.9%                        | 365                                        | 0.10871  | 468                                       | 0.152                                       |

|     |       |     |         |     |              |
|-----|-------|-----|---------|-----|--------------|
| 14  | 0%    | 356 | 0.09735 | 424 | 0.663        |
| 14  | 50%   | 358 | 0.09883 | 436 | 0.644        |
| 14  | 99.9% | 361 | 0.08361 | 463 | 0.233        |
| 15  | 0%    | 354 | 0.06762 | 429 | <b>0.007</b> |
| 15  | 50%   | 354 | 0.06931 | 434 | <b>0.005</b> |
| 15  | 99.9% | 361 | 0.06317 | 462 | <b>0.004</b> |
| HNI | 0%    | 334 | 0.12687 | 381 | 0.011        |
| HNI | 50%   | 334 | 0.12780 | 390 | 0.034        |
| HNI | 99.9% | 357 | 0.12013 | 462 | 0.146        |

[a] Different fraction of water content in DMF. [b] Fluorescence quantum yields calculated using quinine sulfate as the standard (0.1 M H<sub>2</sub>SO<sub>4</sub>,  $\lambda_{\text{ex}}=350$  nm,  $\Phi_{\text{FL}} = 57.7\%$ ).

**Table S2.** CIE coordinates for the naphthalimide congeners (**1-15** and **HNI**) in solution and solid state.

| Naphthalimides | Solution     |              | Solid |       |
|----------------|--------------|--------------|-------|-------|
|                | x            | y            | x     | y     |
| 1              | 0.153        | 0.049        | 0.164 | 0.314 |
| 2              | <b>0.175</b> | <b>0.366</b> | 0.143 | 0.159 |
| 3              | 0.154        | 0.053        | 0.201 | 0.408 |
| 4              | 0.156        | 0.046        | 0.19  | 0.195 |
| 5              | 0.153        | 0.055        | 0.159 | 0.165 |
| 6              | 0.154        | 0.054        | 0.173 | 0.178 |
| 7              | 0.151        | 0.066        | 0.169 | 0.168 |
| 8              | 0.161        | 0.048        | 0.148 | 0.215 |
| 9              | 0.152        | 0.053        | 0.147 | 0.085 |
| 10             | 0.153        | 0.051        | 0.149 | 0.087 |
| 11             | 0.153        | 0.055        | 0.144 | 0.183 |
| 12             | 0.153        | 0.061        | 0.149 | 0.139 |
| 13             | 0.153        | 0.052        | 0.146 | 0.111 |
| 14             | 0.154        | 0.048        | 0.16  | 0.147 |
| 15             | 0.158        | 0.073        | 0.227 | 0.525 |
| HNI            | 0.211        | 0.171        | 0.151 | 0.177 |

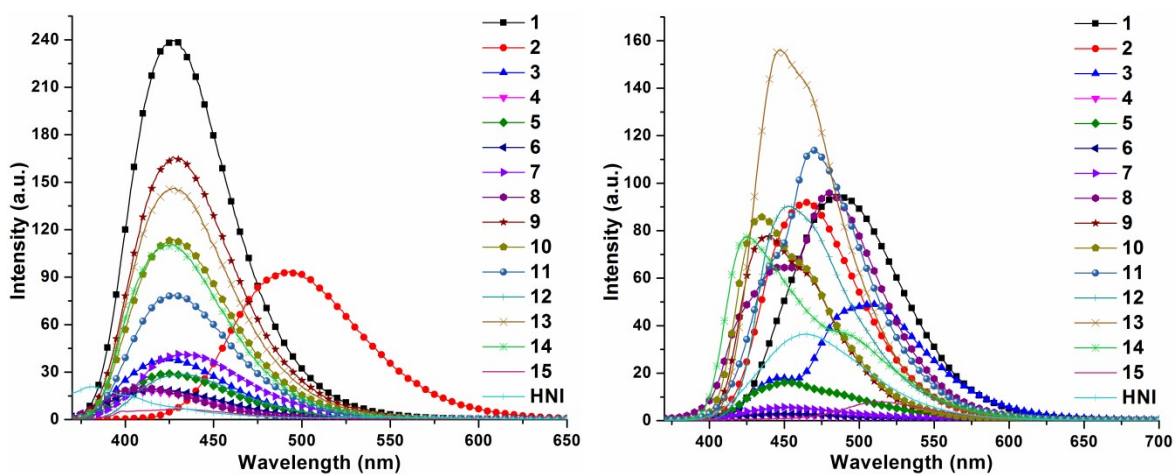

**Figure S2.** (left) Fluorescence spectra of all the congeners in their solution state (in DMF, 10  $\mu\text{M}$ ). (right) Solid-state fluorescence spectra of the luminogens.  $\lambda_{ex} = 355 \text{ nm}$

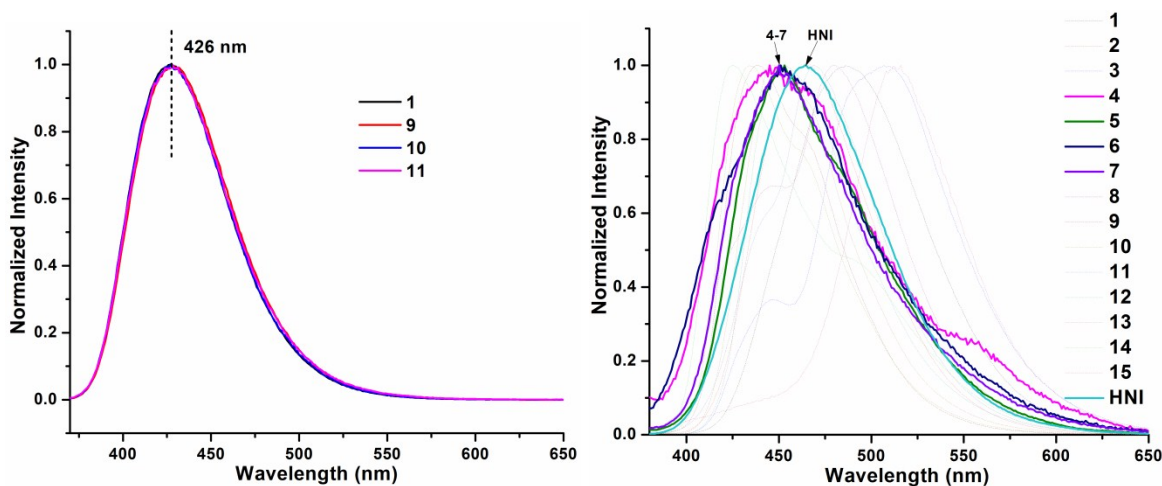

**Figure S3.** (Left) Fluorescence spectra of 1, 9, 10 and 11 in DMF (10  $\mu\text{M}$ ,  $\lambda_{ex} = 355 \text{ nm}$ ). (Right) Solid-state fluorescence spectra of the luminogens **1-15** and **HNI** ( $\lambda_{ex} = 355 \text{ nm}$ ).

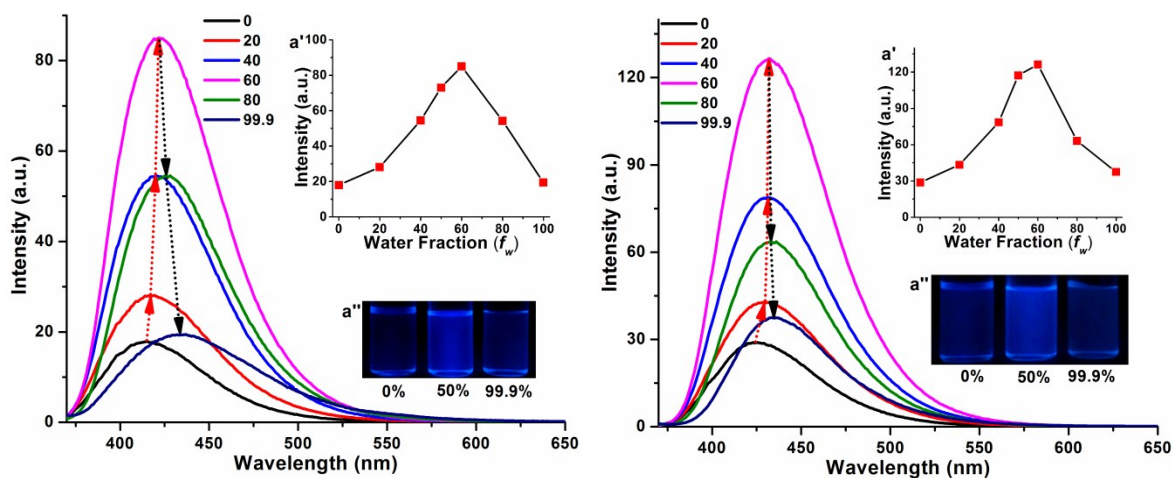

**Figure S4.** Emission spectra of (left) **4** and (right) **5** at different water fraction in DMF (at 25 °C, 10  $\mu$ M,  $\lambda_{ex}$  = 355 nm). Insets: the respective (a') plot of  $\lambda_{emi.max}$  Vs water fraction and (a'') digital photographs at different water fraction in DMF under UV irradiation at 365 nm.

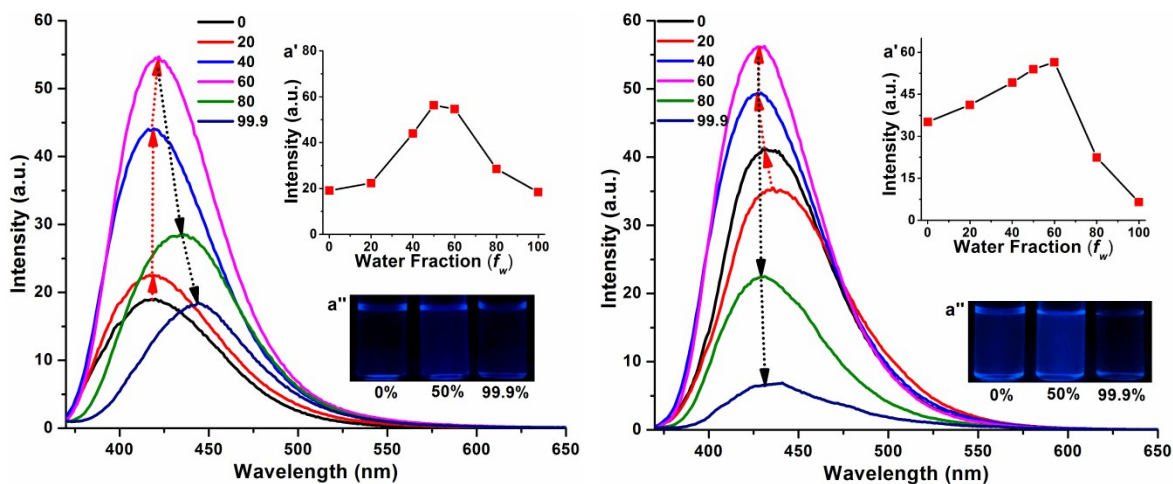

**Figure S5.** Emission spectra of (left) **6** and (right) **7** at different water fraction in DMF (at 25 °C, 10  $\mu$ M,  $\lambda_{ex}$  = 355 nm). Insets: the respective (a') plot of  $\lambda_{emi.max}$  Vs water fraction and (a'') digital photographs at different water fraction in DMF under UV irradiation at 365 nm.

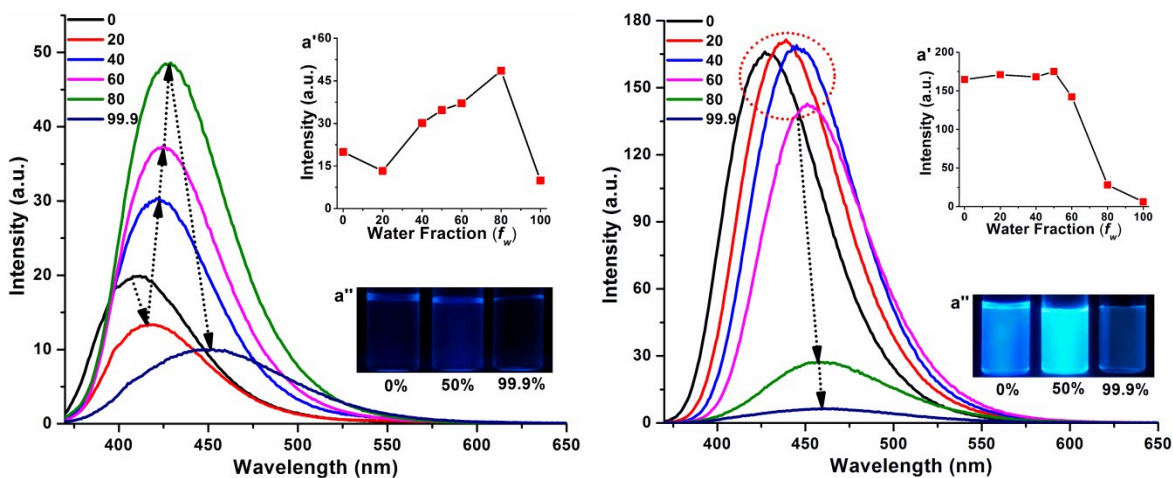

**Figure S6.** Emission spectra of (left) **8** and (right) **9** at different water fraction in DMF (at 25 °C, 10  $\mu$ M,  $\lambda_{ex}$  = 355 nm). Insets: the respective (a') plot of  $\lambda_{emi,max}$  Vs water fraction and (a'') digital photographs at different water fraction in DMF under UV irradiation at 365 nm.

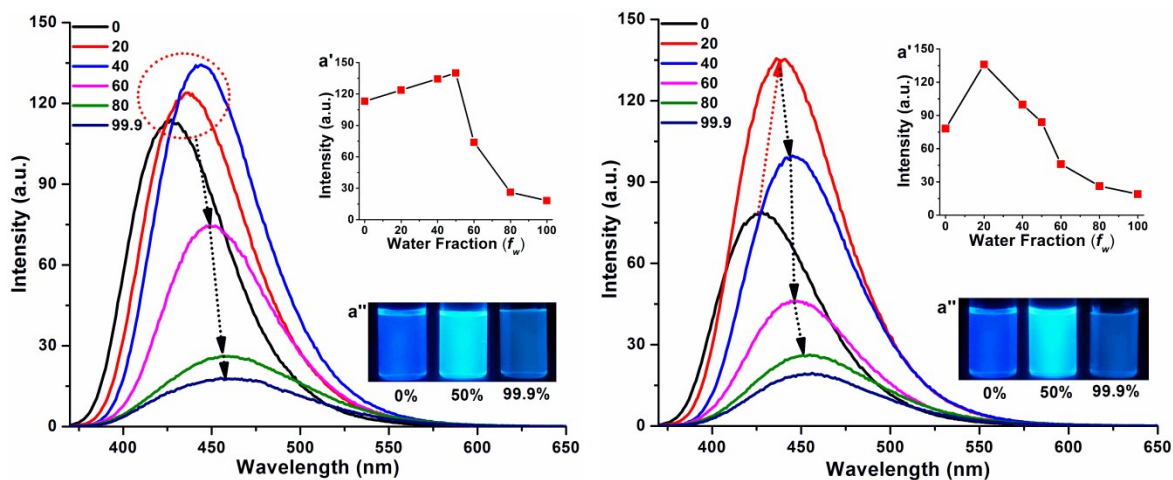

**Figure S7.** Emission spectra of (left) **10** and (right) **11** at different water fraction in DMF (at 25 °C, 10  $\mu$ M,  $\lambda_{ex}$  = 355 nm). Insets: the respective (a') plot of  $\lambda_{emi,max}$  Vs water fraction and (a'') digital photographs at different water fraction in DMF under UV irradiation at 365 nm.

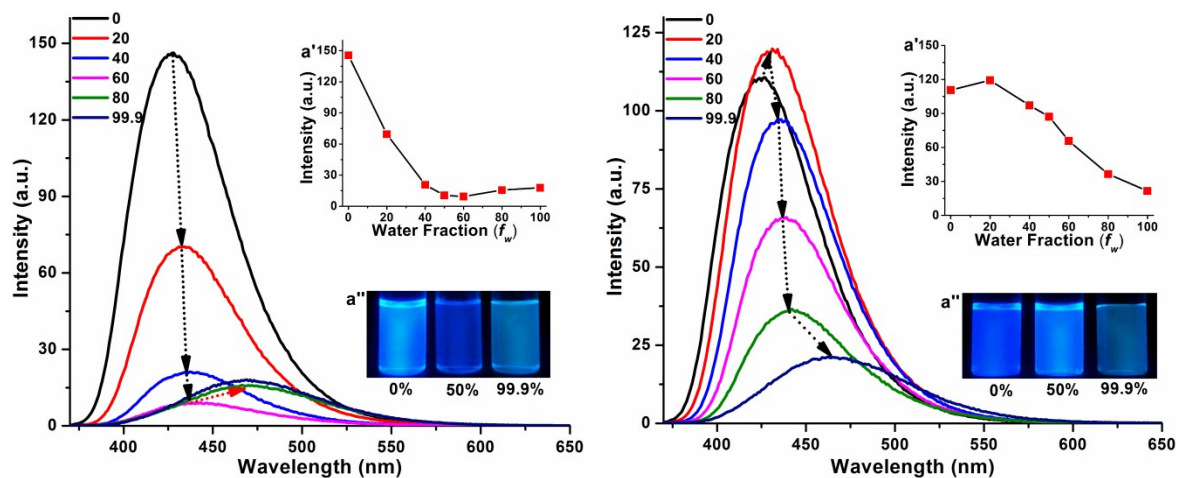

**Figure S8.** Emission spectra of (left) **13** and (right) **14** at different water fraction in DMF (at 25 °C, 10  $\mu$ M,  $\lambda_{ex}$  = 355 nm). Insets: the respective (a') plot of  $\lambda_{emi,max}$  Vs water fraction and (a'') digital photographs at different water fraction in DMF under UV irradiation at 365 nm.

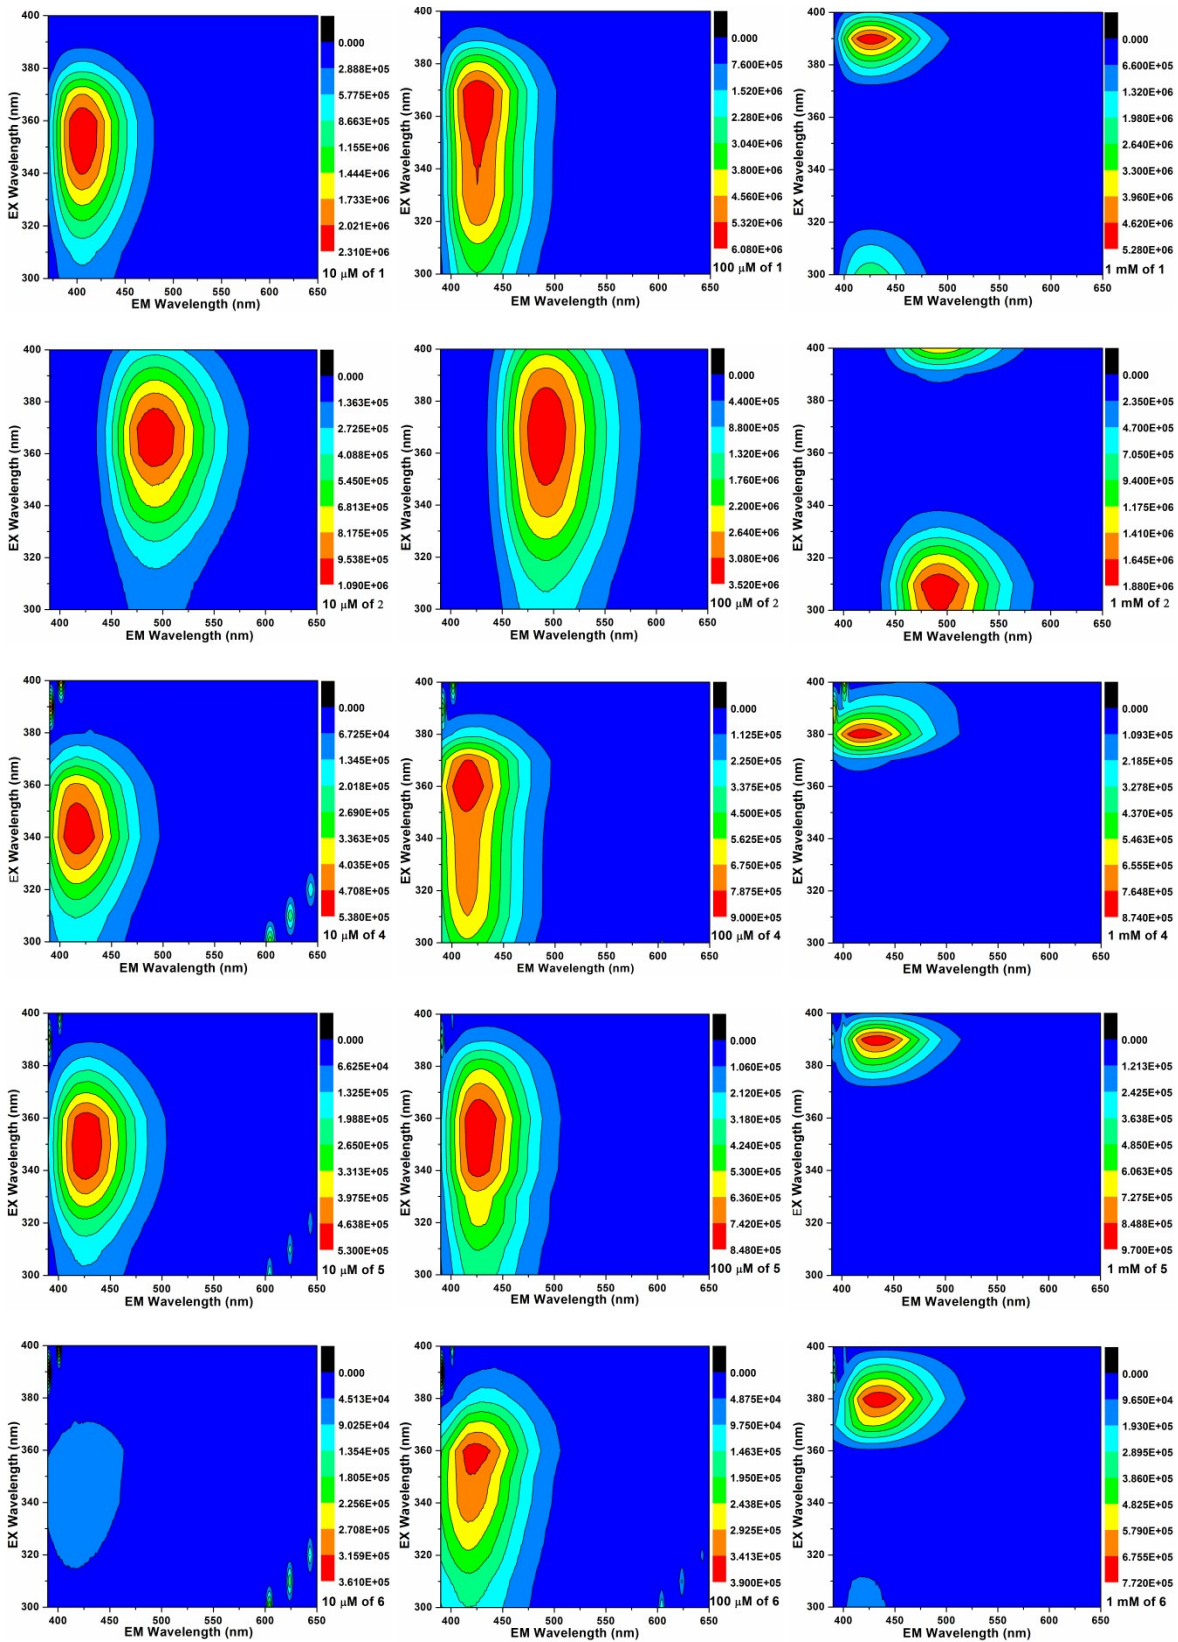



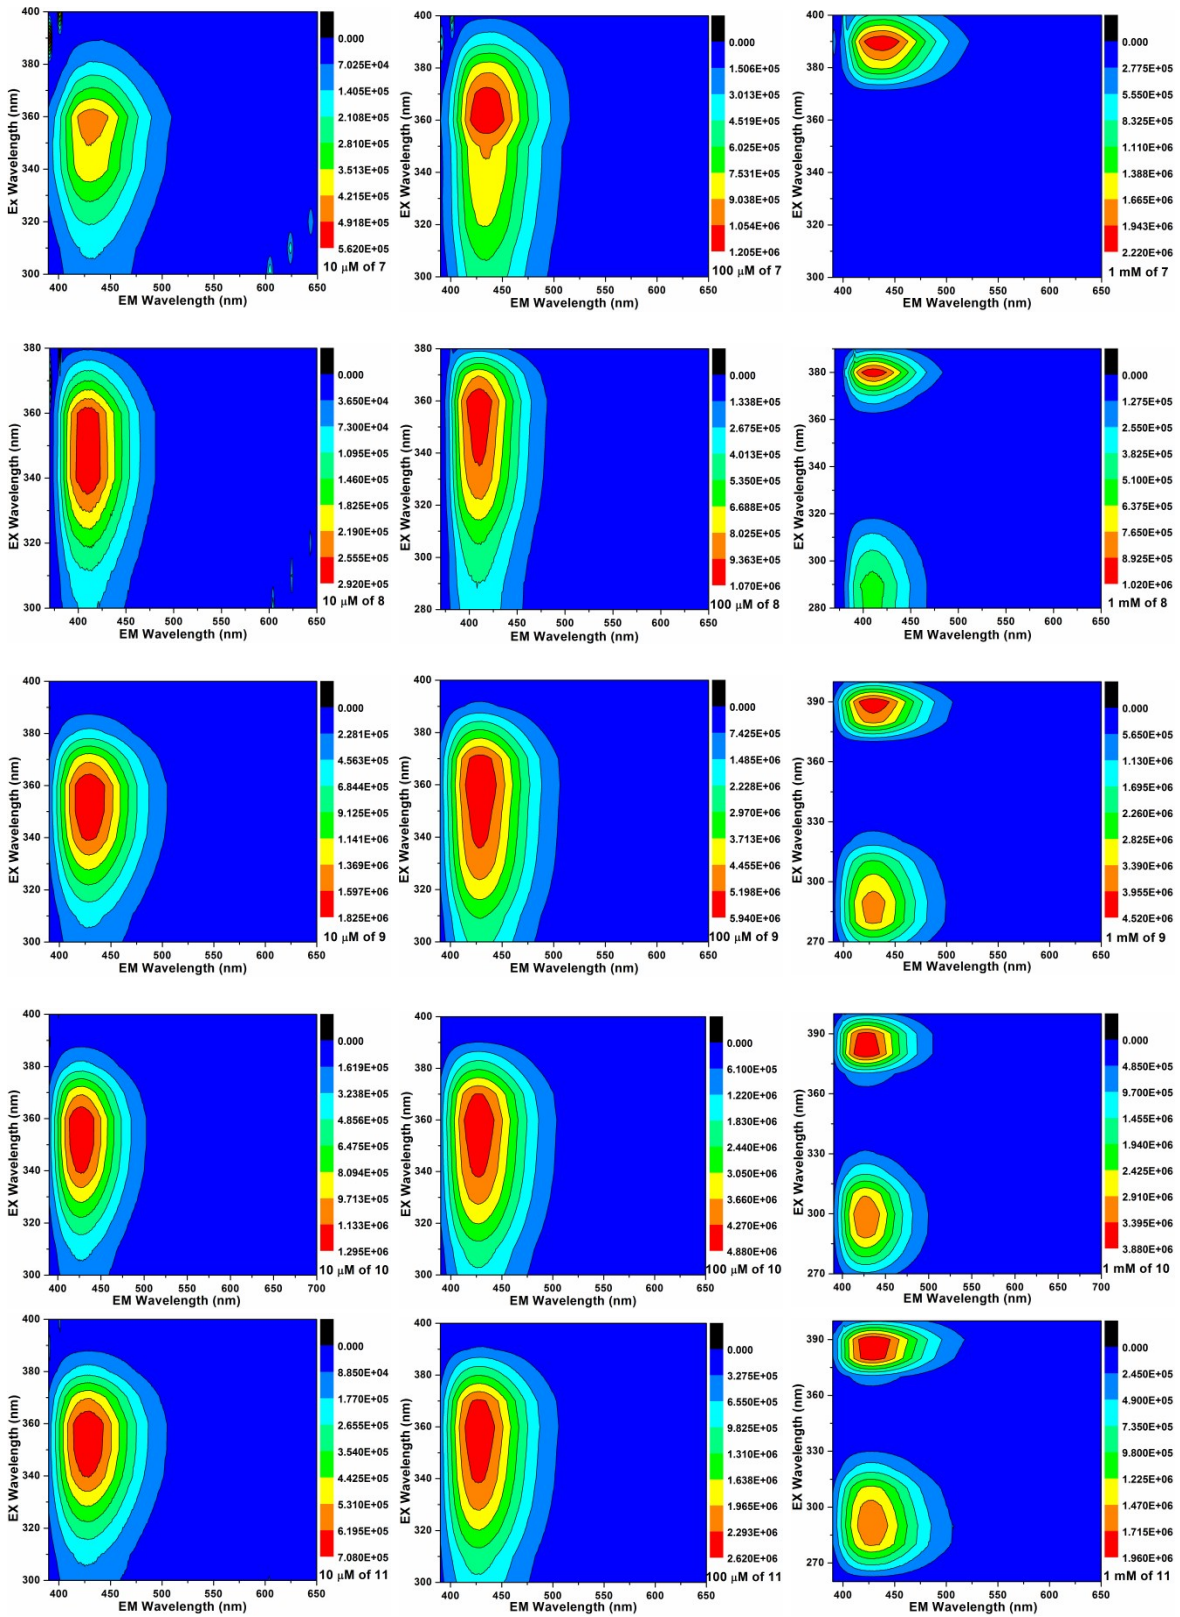

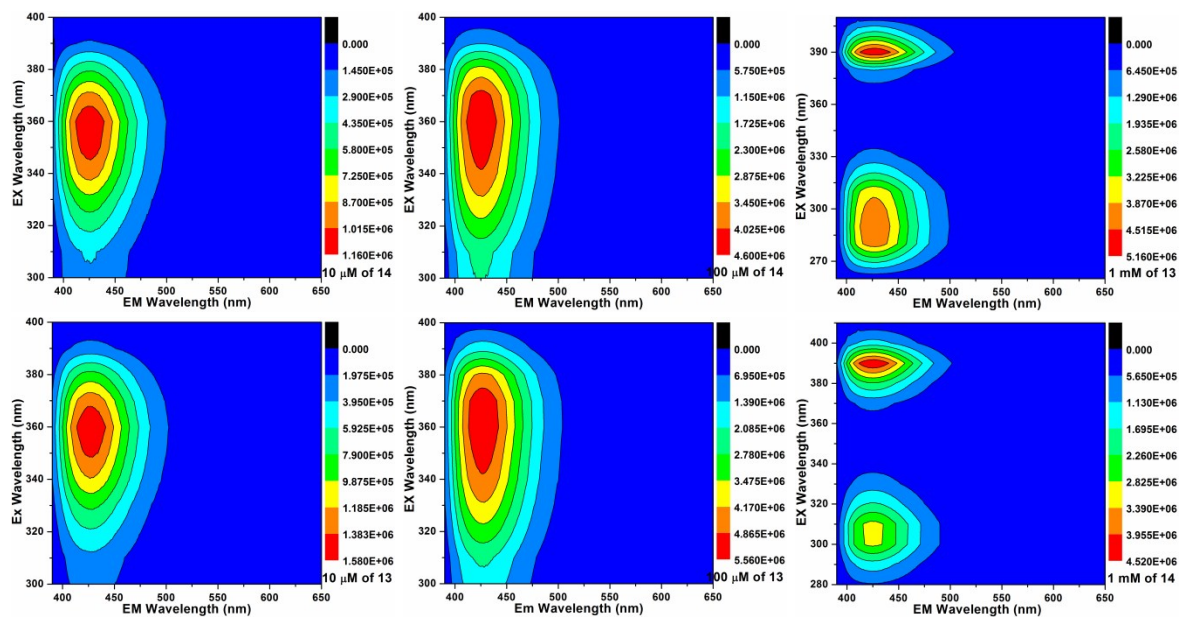

**Figure S9.** Excitation-emission matrix (EEM) spectra (2D contour projections) of **1**, **2**, **4-11**, **13** and **14** in DMF at different probe concentrations at 25 °C. Each row represents the EEM spectra of one congeners with increasing concentrations from left to right.

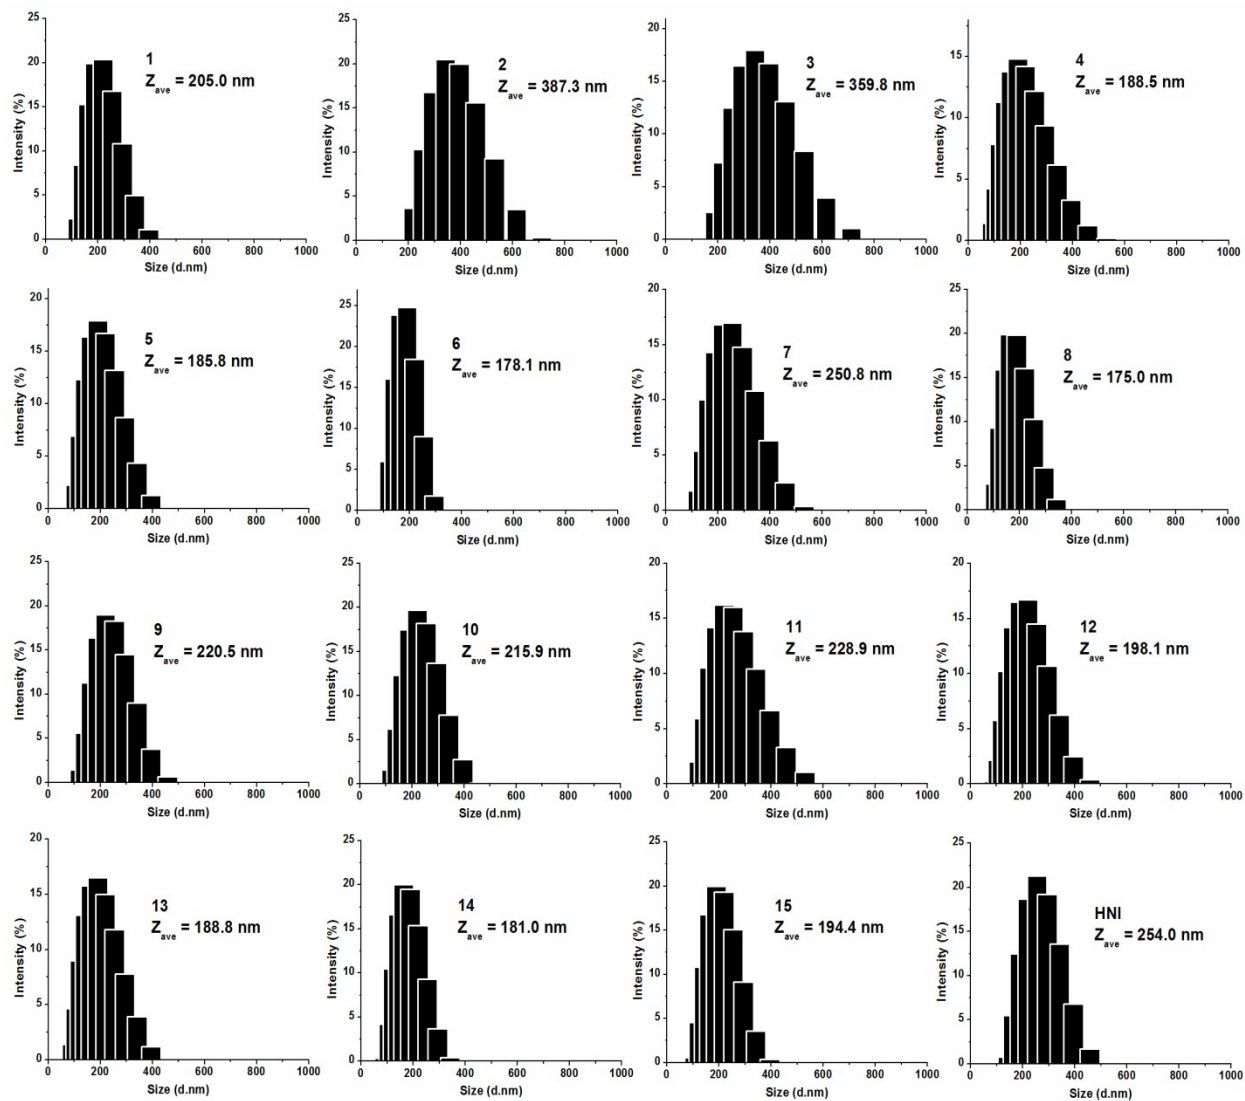

**Figure S10.** Size distribution of 1-15 and HNI nanoaggregates (10 μM) by DLS measurements in water at 25 °C.

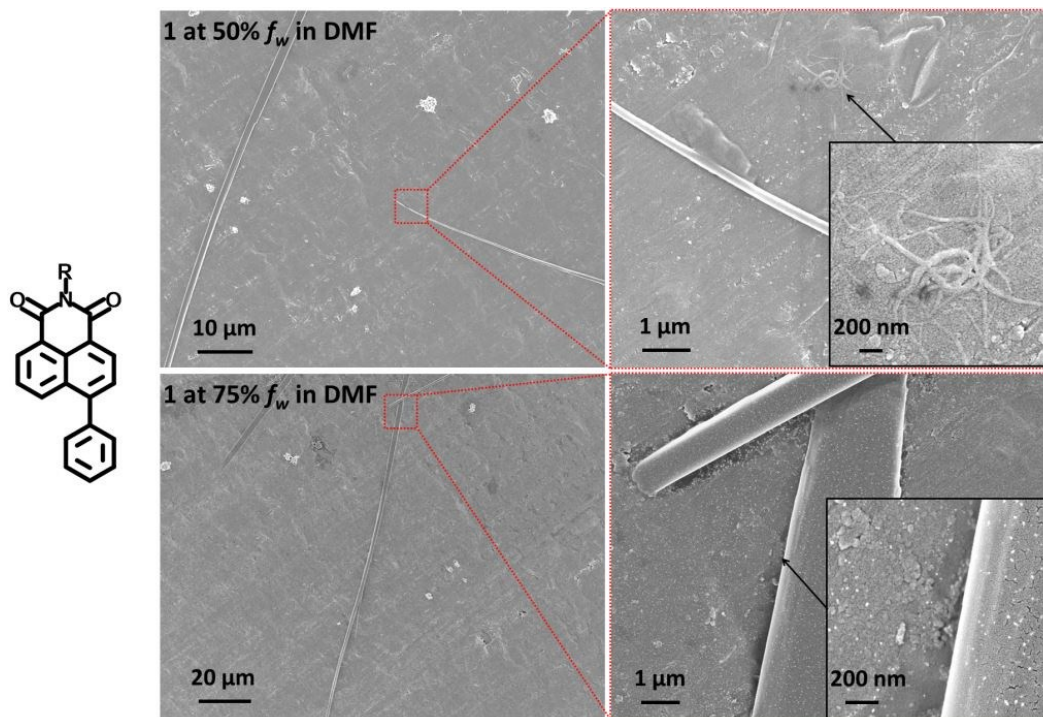

**Figure S11.** FESEM images of the homogeneously dispersed nano-assembly of **1** formed at different  $f_w$  in DMF along with its magnified image at selected area ( $10\ \mu\text{M}$ ). The FESEM images were obtained by simple drop-casting technique followed by room temperature drying of the dispersed solution of the luminogens as schematically presented in Figure 5q.

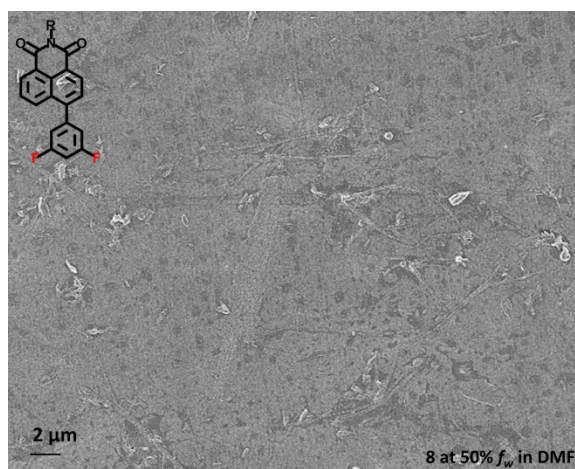

**Figure S12.** FESEM images of the homogeneously dispersed nano-assembly of **8** formed at 50%  $f_w$  in DMF by simple drop-casting technique followed by room temperature drying as schematically presented in Figure 5q ( $10\ \mu\text{M}$ ).

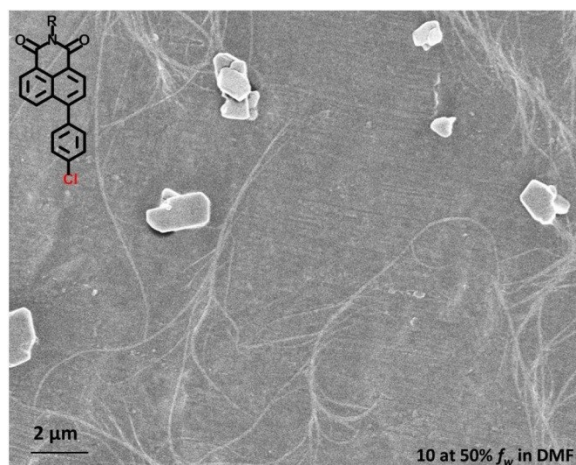

**Figure S13.** FESEM images of the homogeneously dispersed nano-assembly of **10** formed at 50%  $f_w$  in DMF by simple drop-casting technique followed by room temperature drying as schematically presented in Figure 5q (10 μM).

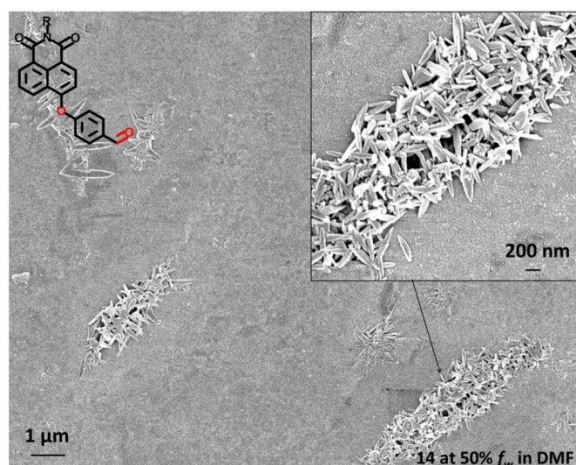

**Figure S14.** FESEM images of the homogeneously dispersed nano-assembly of **14** formed at 50%  $f_w$  in DMF by simple drop-casting technique followed by room temperature drying as schematically presented in Figure 5q (10 μM).

## Crystallographic Details

Concentrated solutions of the congeners in DMF were prepared by heating at 60 °C and then were filtered off to leave behind the undissolved compound or any dust particles. After about 1-3 weeks, different shaped crystals for **2**, **8**, **9**, **10** and **12** suitable for X-ray structure analysis were obtained. However, several attempts to obtain crystals for other congeners in various solvents and their mixture failed or very thin/small crystals were obtained that were not suitable for single crystal analysis. For the control study, the crystal data for HNI was obtained from Cambridge Crystallographic Data Centre where the crystals of HNI were generated by slow diffusion of n-hexane into a solution of dichloromethane containing HNI.<sup>3</sup> Nevertheless, we also obtained the HNI crystal in DMF and were found to have exactly the same intermolecular packing arrangement to that of the HNI single crystal obtained from CCDC which shows the non-polymorphic nature of HNI.

**Table S3.** SC-XRD Data and Parameters for **2**, **8**, **12** and **HNI** crystals.

| Compound Code                     | <b>2</b>                                                                                   | <b>8</b>                                                                                    | <b>9</b>                                                                                                |
|-----------------------------------|--------------------------------------------------------------------------------------------|---------------------------------------------------------------------------------------------|---------------------------------------------------------------------------------------------------------|
| CCDC                              | 1830094                                                                                    | 1830095                                                                                     | 1855370                                                                                                 |
| Empirical Formula                 | C <sub>25</sub> H <sub>25</sub> N <sub>1</sub> O <sub>3</sub>                              | C <sub>24</sub> H <sub>21</sub> F <sub>2</sub> N <sub>1</sub> O <sub>2</sub>                | C <sub>24</sub> H <sub>22</sub> F <sub>1</sub> N <sub>1</sub> O <sub>2</sub>                            |
| Formula Weight                    | 387.47                                                                                     | 393.42                                                                                      | 375.42                                                                                                  |
| Temperature                       | 298(2) K                                                                                   | 298(2) K                                                                                    | 298(2) K                                                                                                |
| Wavelength                        | 0.71073 Å                                                                                  | 0.71073 Å                                                                                   | 0.71073 Å                                                                                               |
| Crystal System                    | monoclinic                                                                                 | monoclinic                                                                                  | triclinic                                                                                               |
| Space Group                       | C 12/c1                                                                                    | P 21/c                                                                                      | P -1                                                                                                    |
| Unit Cell Dimension               | a = 30.150(3) Å, α = 90°<br>b = 9.1044(5) Å, β = 103.266(3)°<br>c = 14.8046(14) Å, γ = 90° | a = 14.4864(12) Å, α = 90°<br>b = 7.2999(5) Å, β = 92.947(8)°<br>c = 19.0729(15) Å, γ = 90° | a = 7.9798(6) Å, α = 75.043(7)°<br>b = 8.9908(8) Å, β = 80.201(7)°<br>c = 14.1265(12) Å, γ = 79.756(7)° |
| Volume                            | 4051.4(6) Å <sup>3</sup>                                                                   | 2014.3(3) Å <sup>3</sup>                                                                    | 955.29(14) Å <sup>3</sup>                                                                               |
| Z                                 | 8                                                                                          | 4                                                                                           | 2                                                                                                       |
| Absorption coefficient            | 0.083 mm <sup>-1</sup>                                                                     | 0.091 mm <sup>-1</sup>                                                                      | 0.089 mm <sup>-1</sup>                                                                                  |
| F (000)                           | 1648                                                                                       | 856                                                                                         | 396                                                                                                     |
| Theta range for data collection   | 2.978 to 24.354°                                                                           | 3.369 to 21.882°                                                                            | 3.369 to 21.882°                                                                                        |
| Index Range                       | -27 ≤ h ≤ 26, -6 ≤ k ≤ 10, -13 ≤ l ≤ 14                                                    | -17 ≤ h ≤ 19, -9 ≤ k ≤ 8, -23 ≤ l ≤ 23                                                      | -10 ≤ h ≤ 10, -11 ≤ k ≤ 11, -18 ≤ l ≤ 15                                                                |
| Reflections                       | 2054/1456 (R <sub>int</sub> = 0.0475)                                                      | 4650/1590 (R <sub>int</sub> = 0.0521)                                                       | 4284/1881 (R <sub>int</sub> = 0.0307)                                                                   |
| Collected/unique                  | 0475                                                                                       |                                                                                             |                                                                                                         |
| Goodness-of-fit on F <sup>2</sup> | 1.085                                                                                      | 1.147                                                                                       | 1.079                                                                                                   |
| Final R indices [I > 2σ(I)]       | R1 = 0.0579, ωR2 = 0.1521                                                                  | R1 = 0.0799, ωR2 = 0.1520                                                                   | R1 = 0.0667, ωR2 = 0.1396                                                                               |
| R indices (all data)              | R1 = 0.0786, ωR2 = 0.1740                                                                  | R1 = 0.2098, ωR2 = 0.2074                                                                   | R1 = 0.1494, ωR2 = 0.1935                                                                               |
| Refinement method                 | SHELXL                                                                                     | SHELXL                                                                                      | SHELXL                                                                                                  |

| Compound Code                     | 10                                                                                                                    | 12                                                                                                                   | HNI                                                                                             |
|-----------------------------------|-----------------------------------------------------------------------------------------------------------------------|----------------------------------------------------------------------------------------------------------------------|-------------------------------------------------------------------------------------------------|
| CCDC                              | 1882969                                                                                                               | 1830096                                                                                                              | 1014214                                                                                         |
| Empirical Formula                 | C <sub>24</sub> H <sub>22</sub> Cl <sub>1</sub> N <sub>1</sub> O <sub>2</sub>                                         | C <sub>24</sub> H <sub>23</sub> N <sub>1</sub> O <sub>3</sub>                                                        | C <sub>18</sub> H <sub>19</sub> N O <sub>2</sub>                                                |
| Formula Weight                    | 391.89                                                                                                                | 373.44                                                                                                               | 281.34                                                                                          |
| Temperature                       | 298(2) K                                                                                                              | 298(2) K                                                                                                             | 298(2) K                                                                                        |
| Wavelength                        | 0.71073 Å                                                                                                             | 0.71073 Å                                                                                                            | 0.71073 Å                                                                                       |
| Crystal System                    | Triclinic                                                                                                             | Triclinic                                                                                                            | Monoclinic                                                                                      |
| Space Group                       | P -1                                                                                                                  | P -1                                                                                                                 | P 21/n                                                                                          |
| Unit Cell Dimension               | a = 7.9984(11) Å, α =<br>76.640(4) °<br>b = 9.3801(12) Å, β =<br>80.682(4) °<br>c = 13.8330(18) Å, γ =<br>79.490(4) ° | a = 7.7872(5) Å, α =<br>102.882(7) °<br>b = 8.7869(7) Å, β =<br>96.881(6) °<br>c = 15.0163(14) Å, γ =<br>92.192(6) ° | a = 8.2418(14) Å, α = 90°<br>b = 16.336(3) Å, β =<br>103.266(3) °<br>c = 11.3610(19) Å, γ = 90° |
| Volume                            | 985.0(2)                                                                                                              | 992.18(14) Å <sup>3</sup>                                                                                            | 1488.8(4) Å <sup>3</sup>                                                                        |
| Z                                 | 2                                                                                                                     | 2                                                                                                                    | 4                                                                                               |
| Absorption coefficient            | 0.204 mm <sup>-1</sup>                                                                                                | 0.080 mm <sup>-1</sup>                                                                                               | 0.082 mm <sup>-1</sup>                                                                          |
| F (000)                           | 360                                                                                                                   | 396                                                                                                                  | 600                                                                                             |
| Theta range for data collection   | 3.171 to 28.517°                                                                                                      | 3.593 to 26.097°                                                                                                     | 2.22 to 25.99°                                                                                  |
| Index Range                       | -10 ≤ h ≤ 10, -<br>12 ≤ k ≤ 12,<br>-18 ≤ l ≤ 18                                                                       | -10 ≤ h ≤ 9, -11 ≤ k ≤ 11,<br>-18 ≤ l ≤ 19                                                                           | -10 ≤ h ≤ 10, -20 ≤ k ≤ 20,<br>-13 ≤ l ≤ 14                                                     |
| Reflections Collected/unique      | 4063/1721 (R <sub>int</sub> =<br>0.0909)                                                                              | 4449/2485 (R <sub>int</sub> = 0.0207)                                                                                | 11160/2930 (R <sub>int</sub> = 0.0346)                                                          |
| Goodness-of-fit on F <sup>2</sup> | 0.889                                                                                                                 | 1.035                                                                                                                | 1.036                                                                                           |
| Final R indices [I > 2σ(I)]       | R1 = 0.0509, ωR2 =<br>0.0950                                                                                          | R1 = 0.0776, ωR2 =<br>0.2024                                                                                         | R1 = 0.0569, ωR2 =<br>0.1592                                                                    |
| R indices (all data)              | R1 = 0.1312, ωR2 =<br>0.1099                                                                                          | R1 = 0.1252, ωR2 =<br>0.2433                                                                                         | R1 = 0.0689, ωR2 =<br>0.1744                                                                    |
| Refinement method                 | SHELXL                                                                                                                | SHELXL                                                                                                               | SHELXL                                                                                          |

The data integration and reduction were processed with SAINT.<sup>4</sup> SHELXL-97 was used for the structure solutions via direct method and refined by full-matrix least-squares on F<sup>2</sup>.<sup>5</sup>

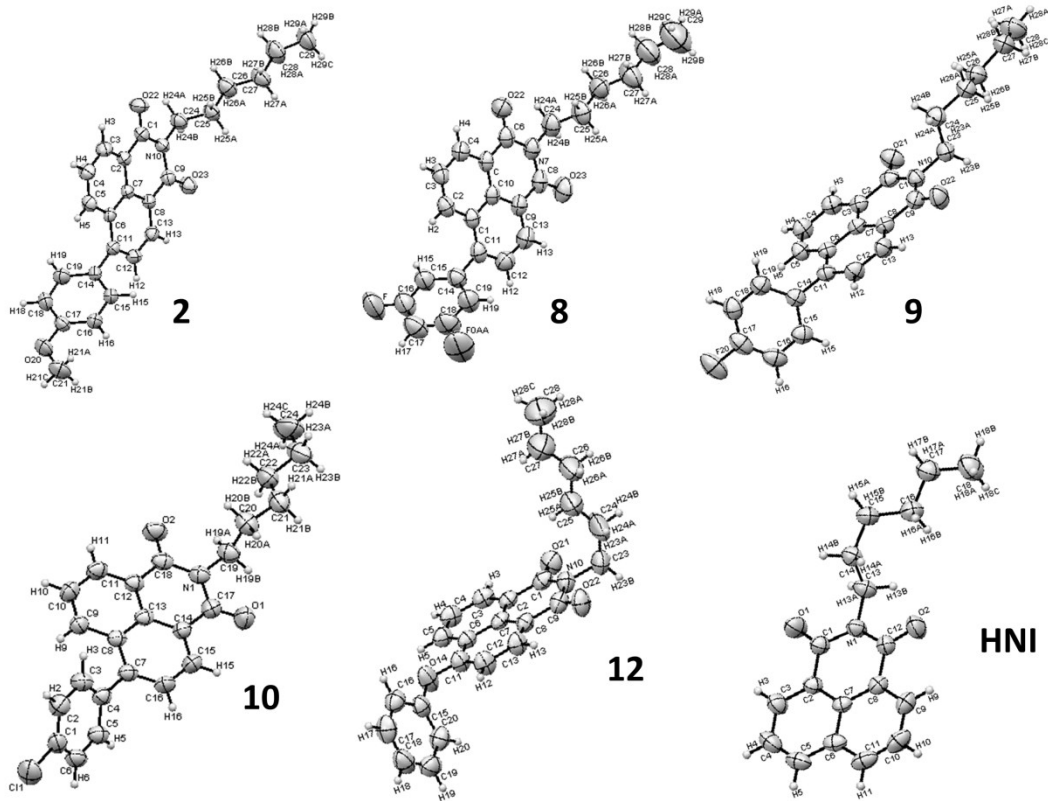

**Figure S15.** Oak Ridge Thermal Ellipsoid Plot (ORTEP) of compounds (**2**, **8**, **9**, **10**, **12** and **HNI**) with the thermal ellipsoids set at 50% probability.

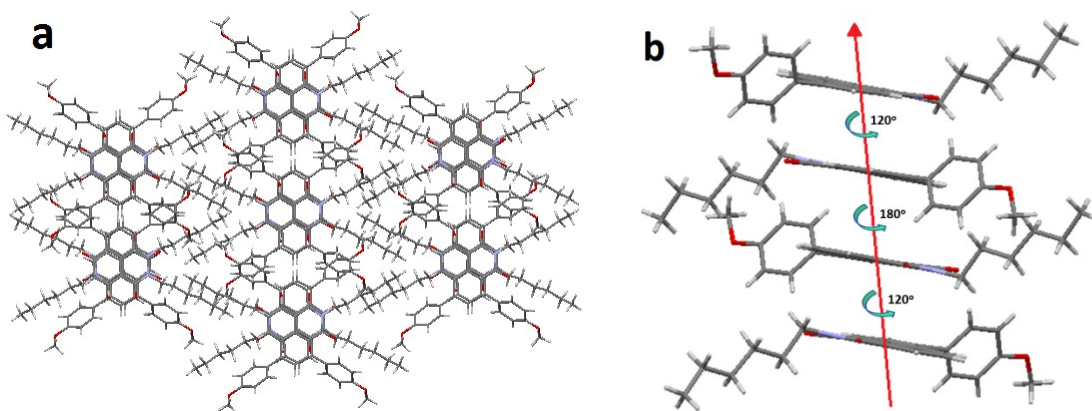

**Figure S16.** (a) Single crystal packing diagram of **2** as viewed down along crystallographic *c* axis. (b) Face-to-face packing in **2** showing the rotation angle considering the naphthalimide core.



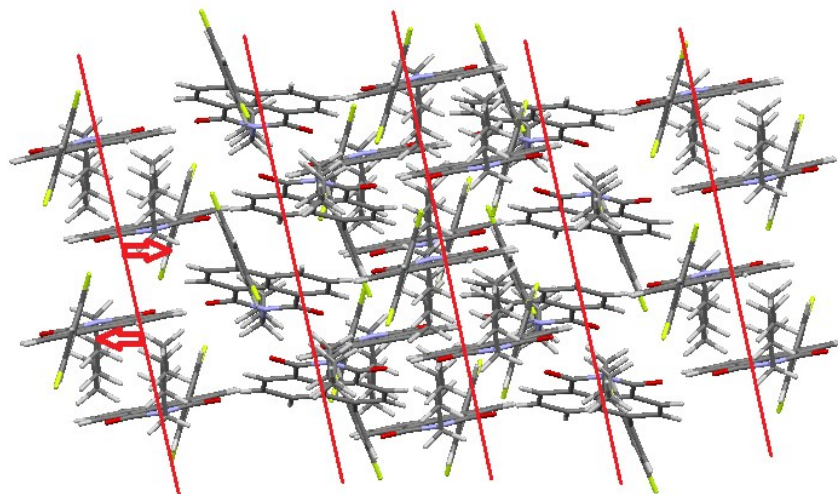

**Figure S17.** Single crystal packing diagram of **8**.

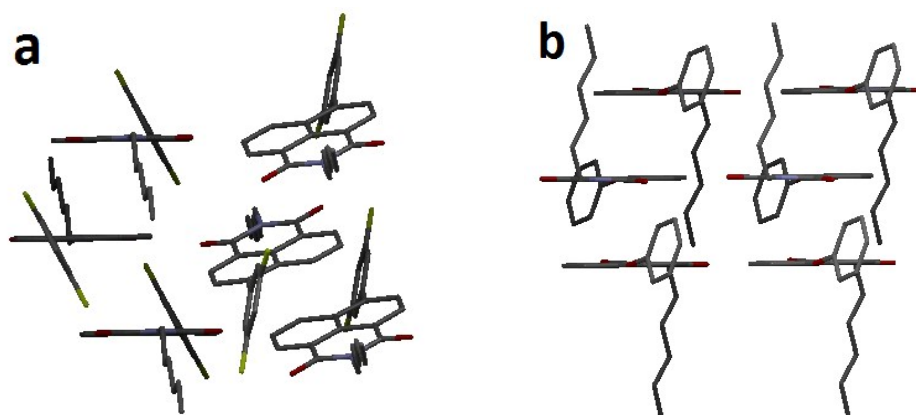

**Figure S18.** Single crystal packing diagram of (a) **8** and (b) **12** showing the arrangement perturbation in the naphthalimide congeners by simple structural modification.

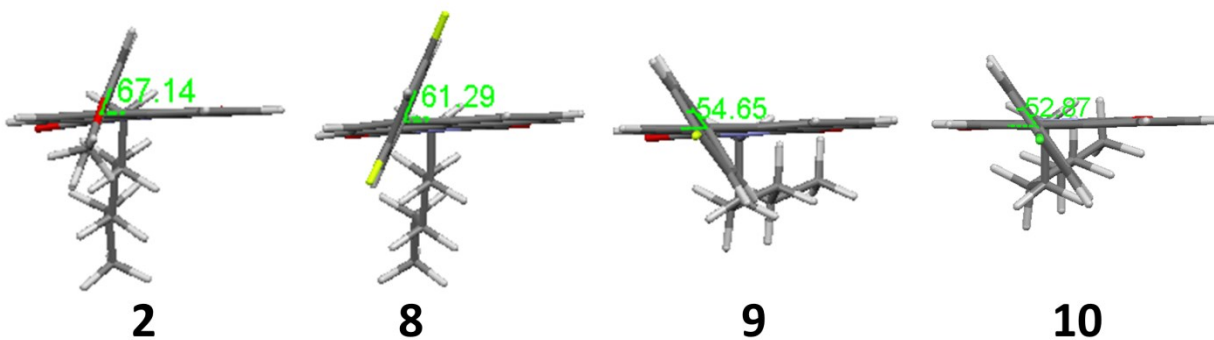

**Figure S19.** Crystal structures of **2**, **8**, **9** and **10** (left to right) showing the dihedral angle between naphthalimide and phenyl planes.

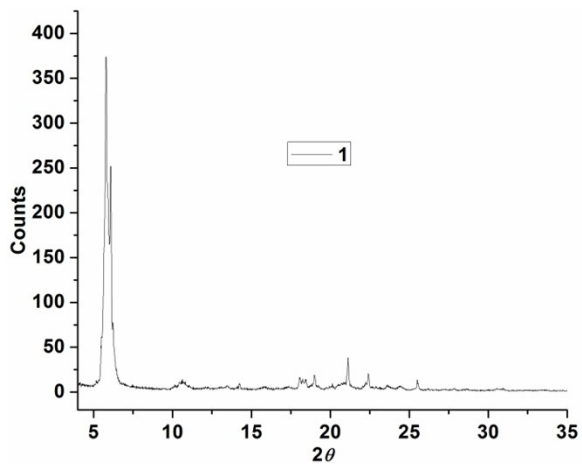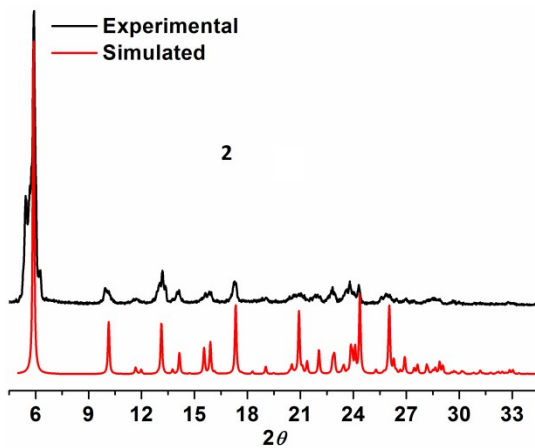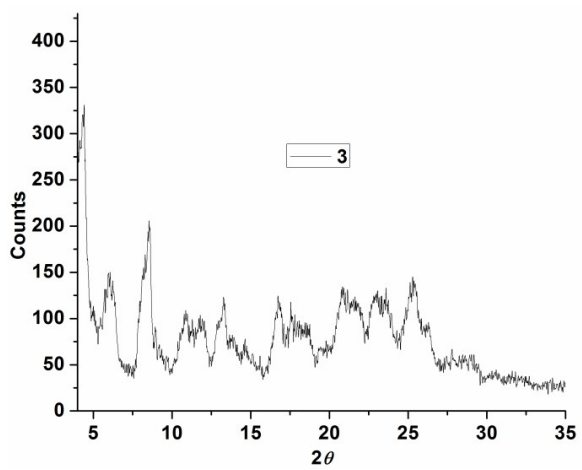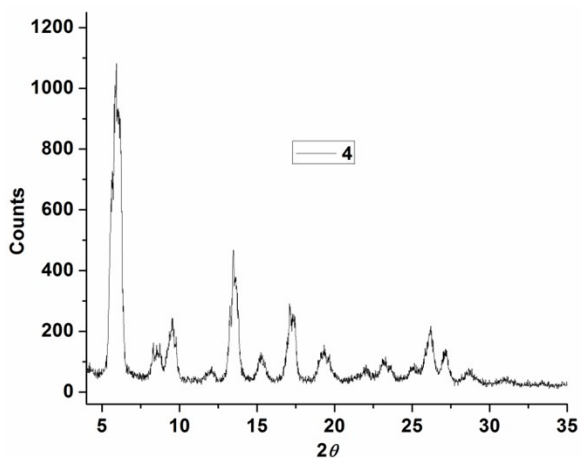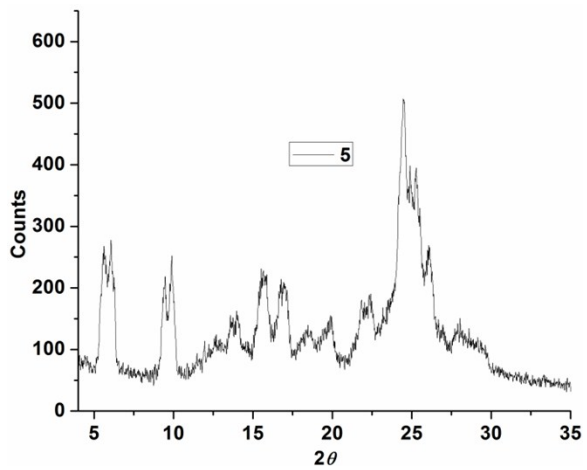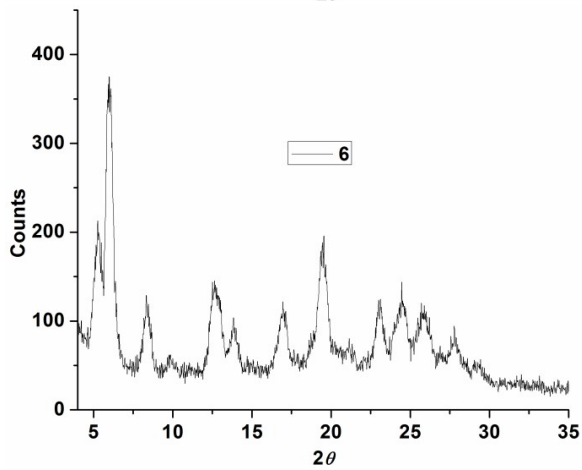

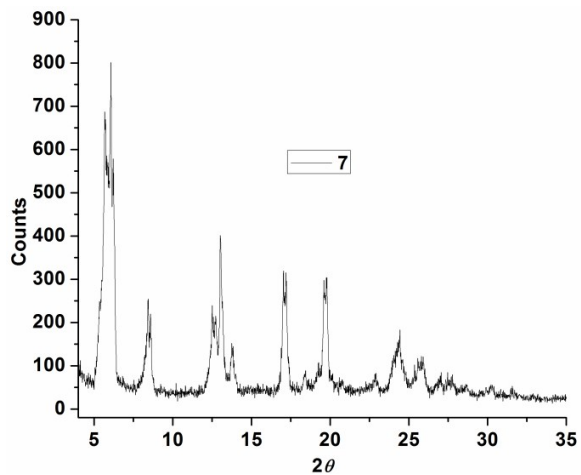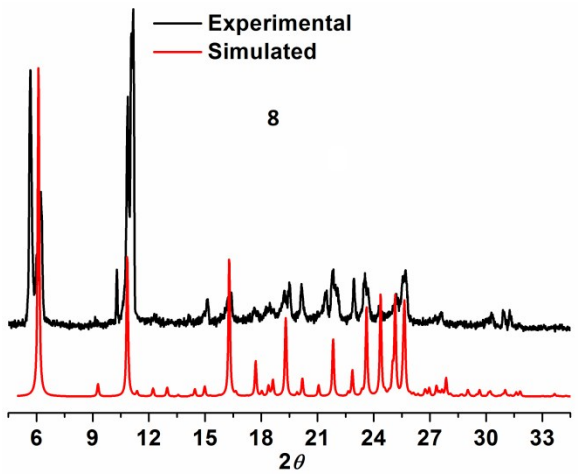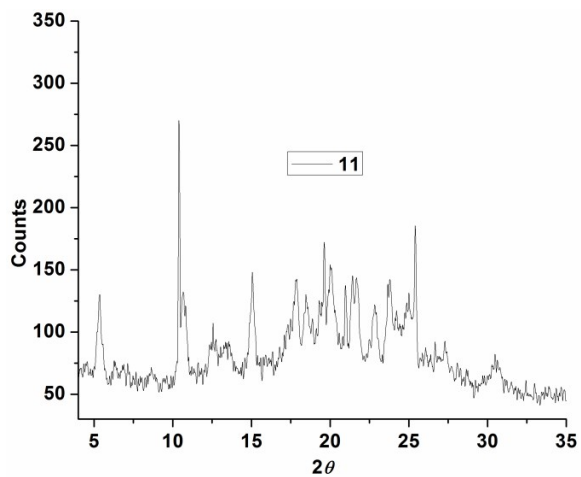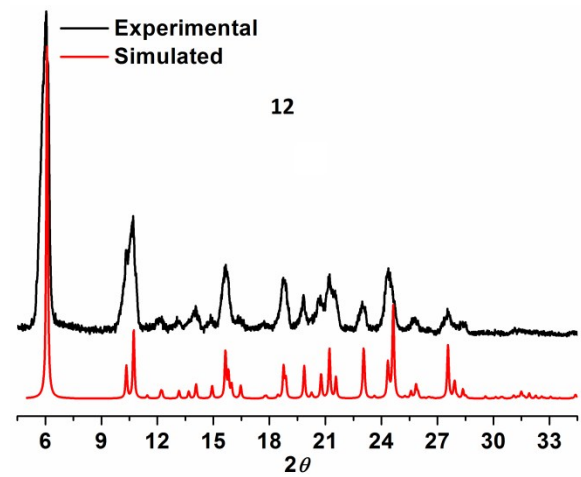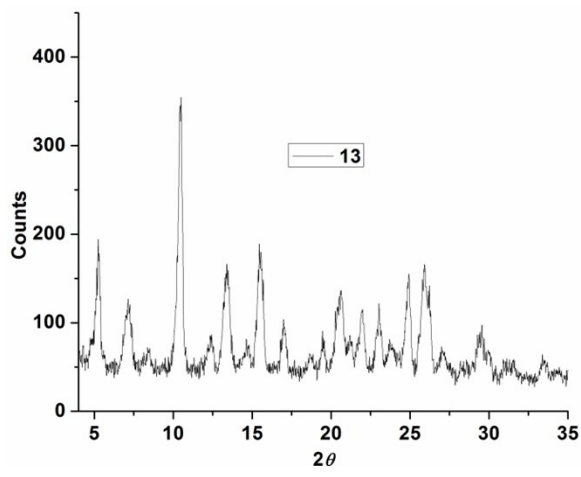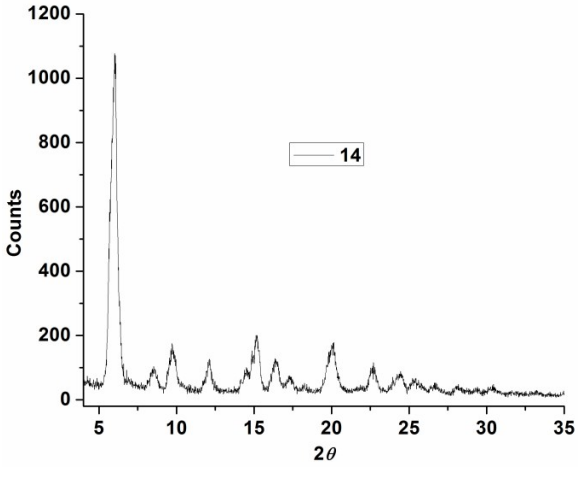

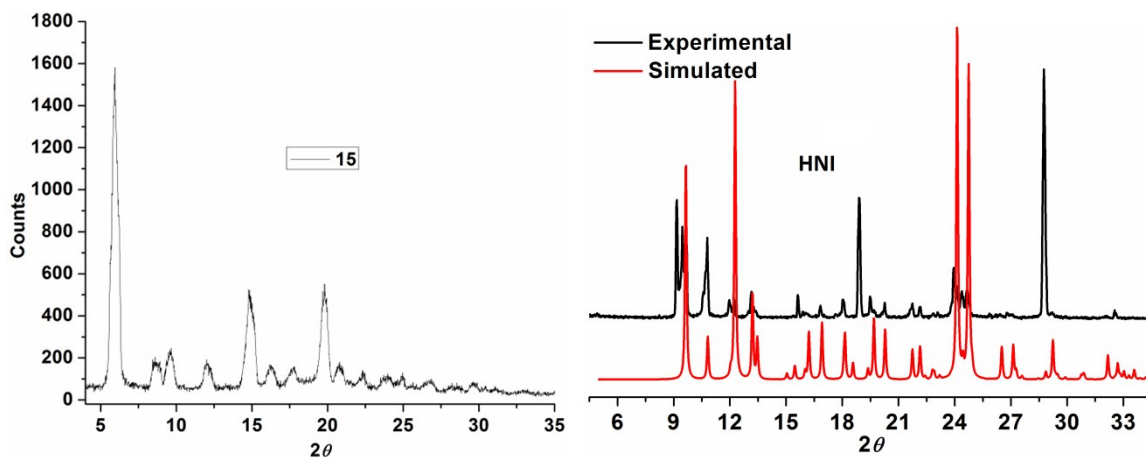

**Figure S20.** PXRD pattern of the congeners. For few compounds with single crystal XRD data, the simulated PXRD patterns have been compared with their respective experimental data.

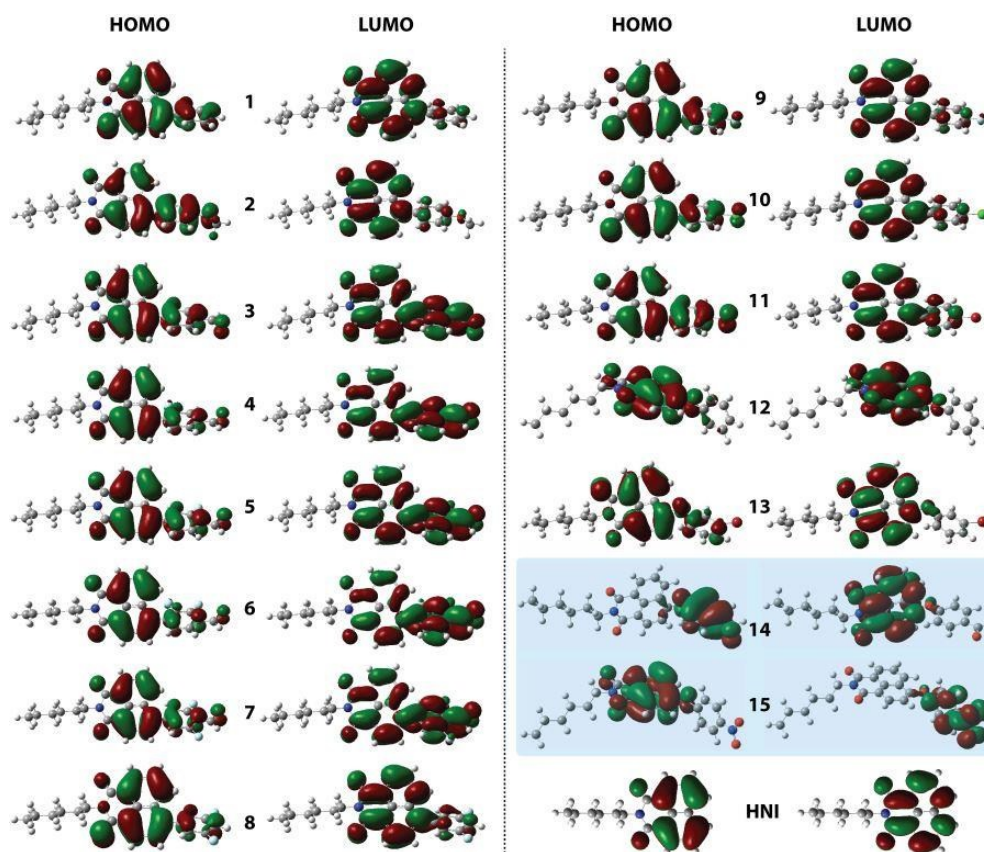

**Figure S21.** Optimized structures and HOMO/LUMO electron density of the congeners in the excited states. Computations were executed using time dependent density functional theory with the B3LYP exchange functional employing 6-31G\* basis sets in the Gaussian 09 program.<sup>1,2</sup>

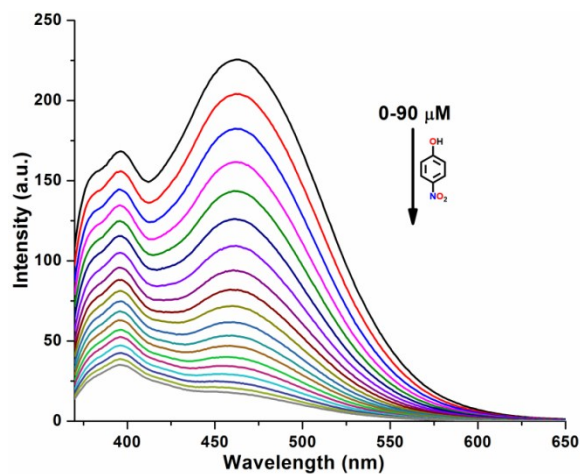

**Figure S22.** Fluorescence response of **HNI** toward p-nitrophenol in water at 25 °C.

**Table S4.** DFT calculated HOMO and LUMO energy levels of **HNI** and other small aromatic analytes.<sup>1,2</sup>

| Molecules                | HOMO (eV) | LUMO (eV) |
|--------------------------|-----------|-----------|
| HNI                      | -6.56638  | -2.55488  |
| p-nitrophenol            | -7.13701  | -2.76141  |
| Phenol                   | -0.12109  | 5.20799   |
| Bromobenzene             | -6.68802  | -0.36218  |
| Chlorobenzene            | -6.89482  | -0.43212  |
| Fluorobenzene            | -6.84013  | -0.34314  |
| 2-fluorobenzaldehyde     | -7.01972  | -2.08793  |
| 3-Bromophenol            | -6.40203  | -0.42776  |
| 3-Fluorobenzaldehyde     | -7.28123  | -2.22834  |
| 4-hydroxybenzaldehyde    | -6.64775  | -1.7116   |
| 1,3-Difluorobenzene      | -7.12394  | -0.64328  |
| 2,3-Difluorobenzaldehyde | -7.28531  | -2.38045  |
| 2,6-Difluorobenzaldehyde | -7.12013  | -2.32521  |
| Benzaldehyde             | -6.99306  | -1.9018   |
| Benzene                  | -6.75387  | 0.102043  |
| PhOMe                    | -6.50706  | -0.02122  |

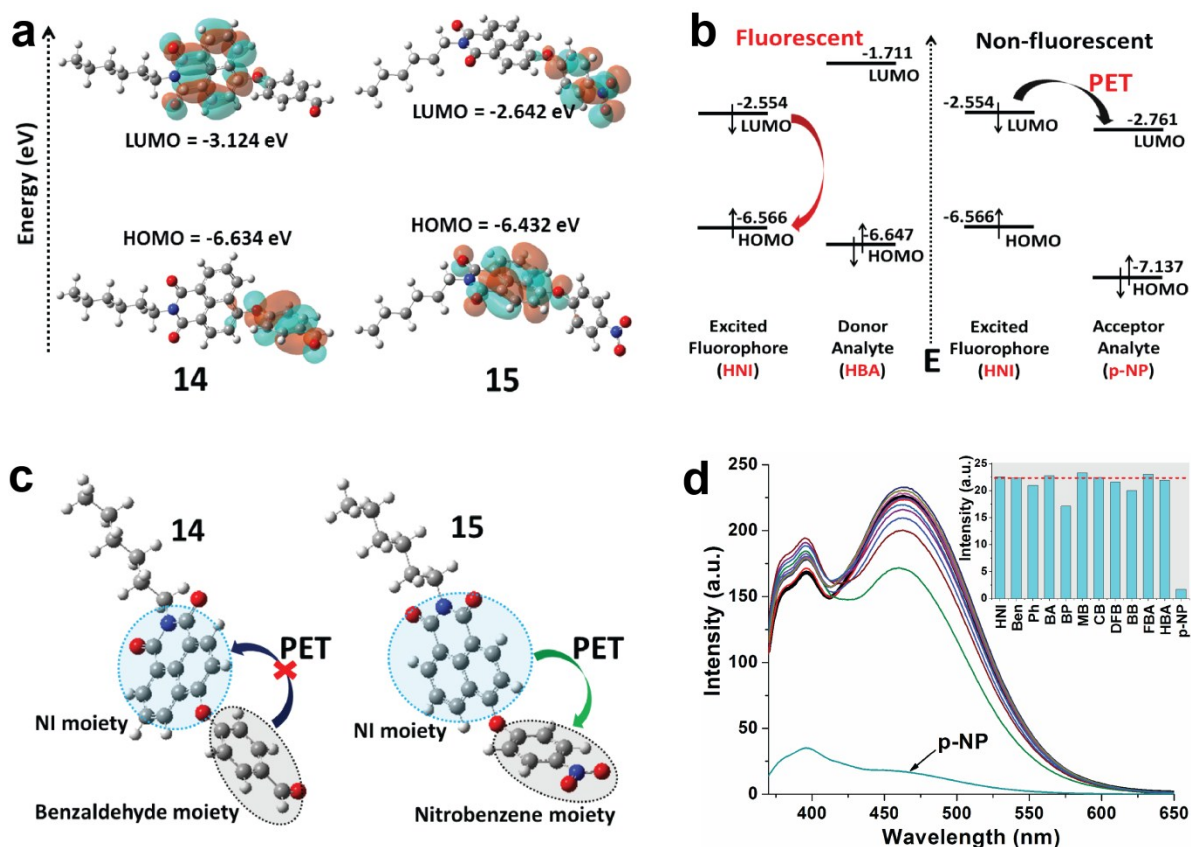

**Figure S23** (a) HOMO/LUMO electron distribution in **14** and **15**. (b) Schematic molecular orbital diagram of the fluorescence on/off switch in HNI via PET process with p-hydroxybenzaldehyde and p-nitrophenol (values are in eV). (c) Optimized structure of **14** and **15** presenting the co-regulation of response emission by the PET mechanism. (d) Fluorescence emission spectra of HNI (10  $\mu\text{M}$ ) in presence of various small molecules (90  $\mu\text{M}$ ) in water. Inset: bar diagram showing the fluorescence intensity of HNI and HNI + small molecules at 470 nm; left to right: HNI only, benzene (Ben), phenol (Ph), benzaldehyde (BA), bromophenol (BP), methoxybenzene (MB), chlorobenzene (CB), difluorobenzene (DFB), bromobenzene (BB), fluorobenzaldehyde (FBA), p-hydroxybenzaldehyde (HBA), p-nitrophenol (p-NP).

# <sup>1</sup>H NMR Spectra

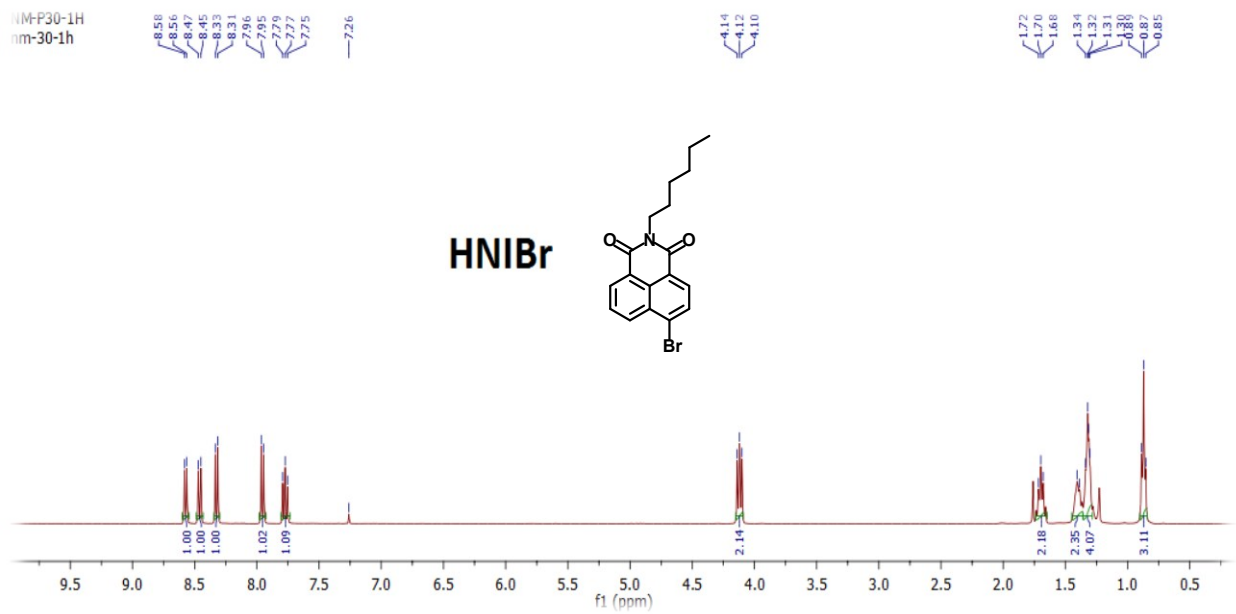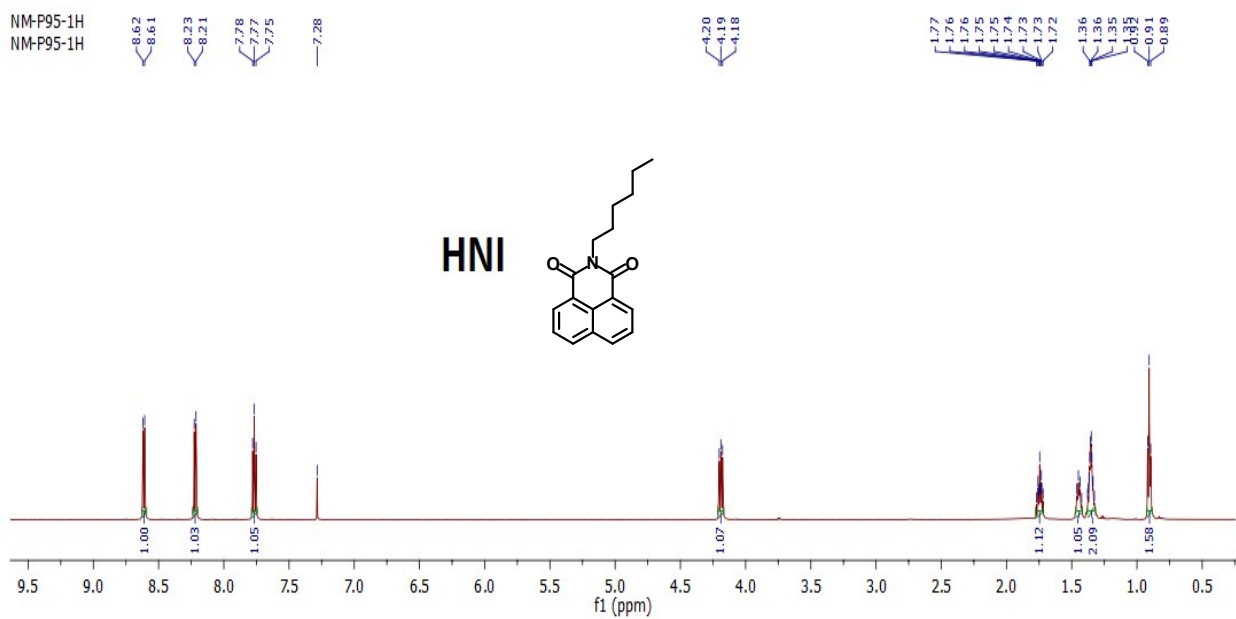

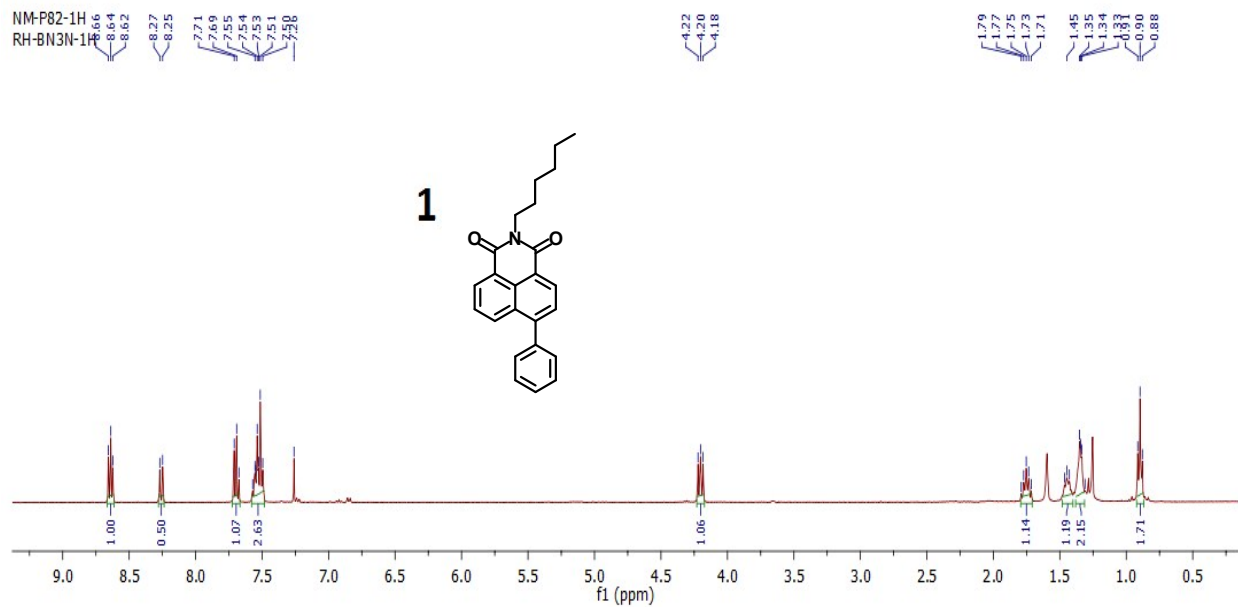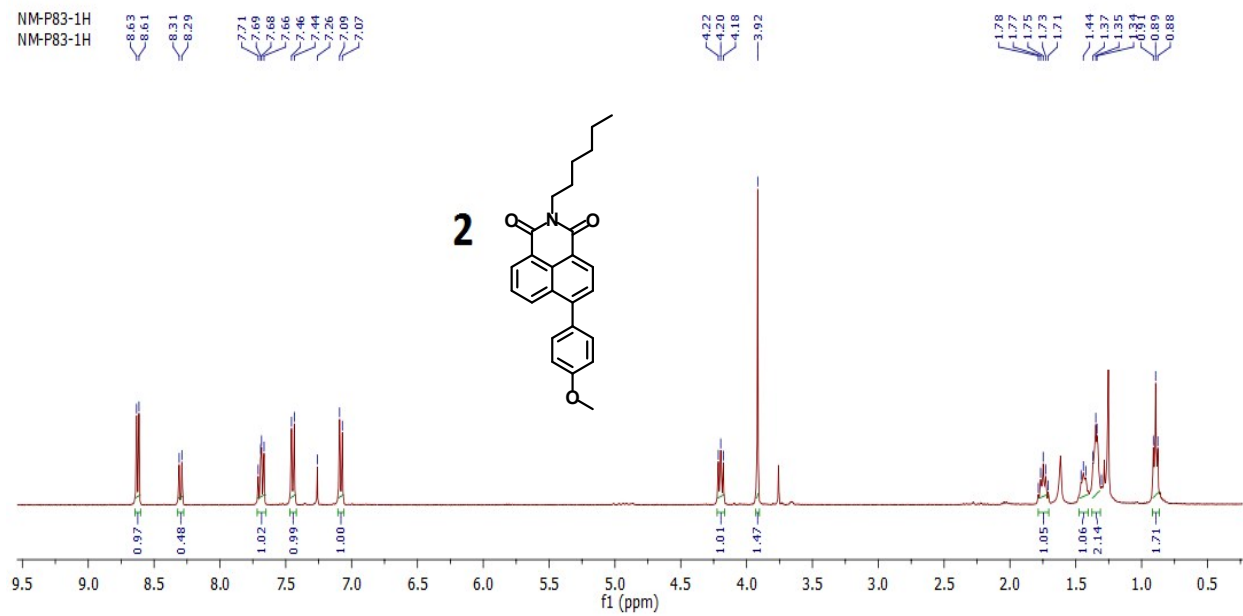



NM-P74-1H  
NM-P74-1H

10.15

8.67  
8.66  
8.64  
8.18  
8.08  
8.07  
7.72  
7.71  
7.70  
7.69  
7.26

4.20  
4.19  
4.18

1.75  
1.74  
1.73  
1.34  
1.34  
1.34  
0.89  
0.88

3

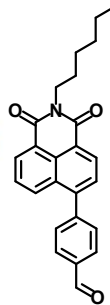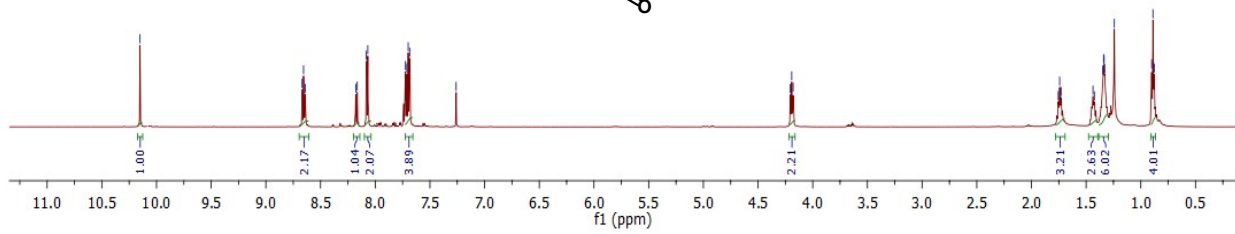

NM-P77-1H  
1H

10.12  
10.11

8.69  
8.68  
8.66  
8.65  
7.87  
7.80  
7.78  
7.74  
7.74  
7.73  
7.52

4.21  
4.20  
4.19

1.76  
1.74  
1.73  
1.35  
1.35  
1.35  
0.89  
0.88

4

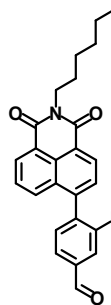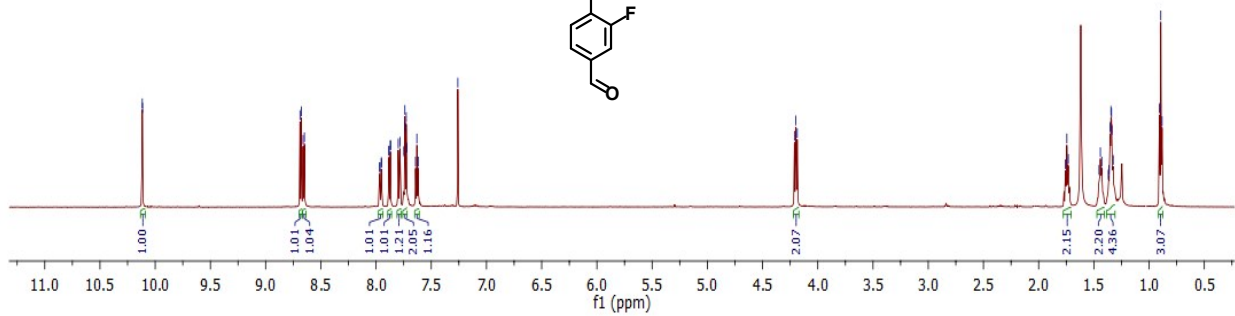

NM-P84-1H  
NM-P84-1H

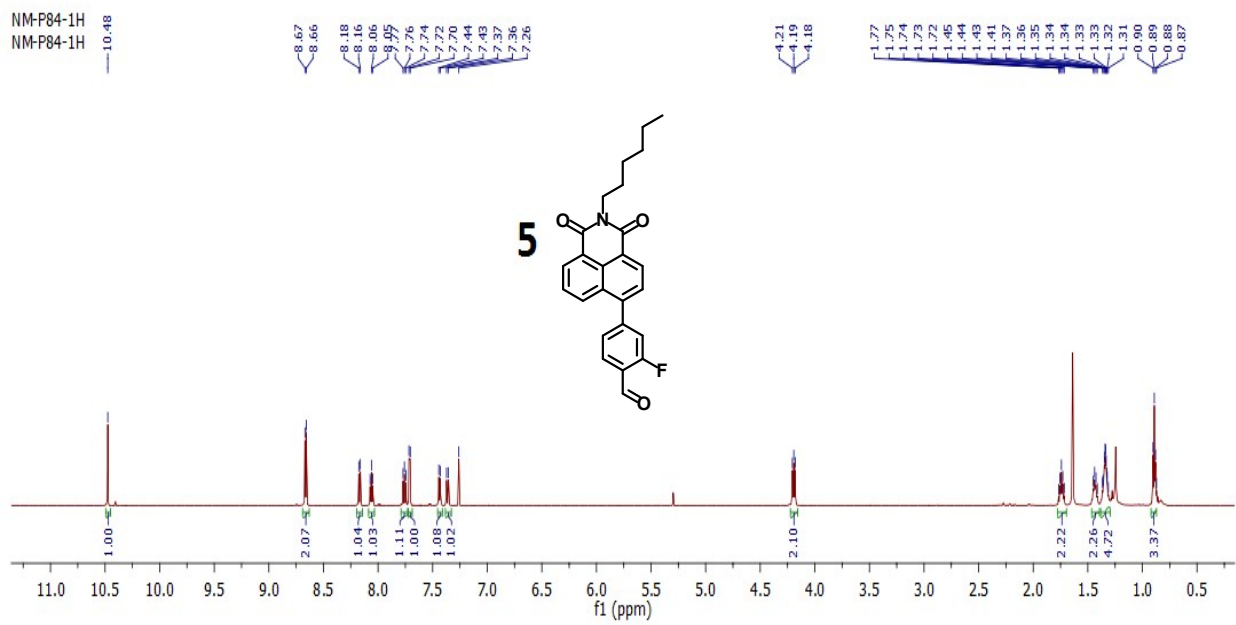

NM-P78-1H  
NM-P78-1H

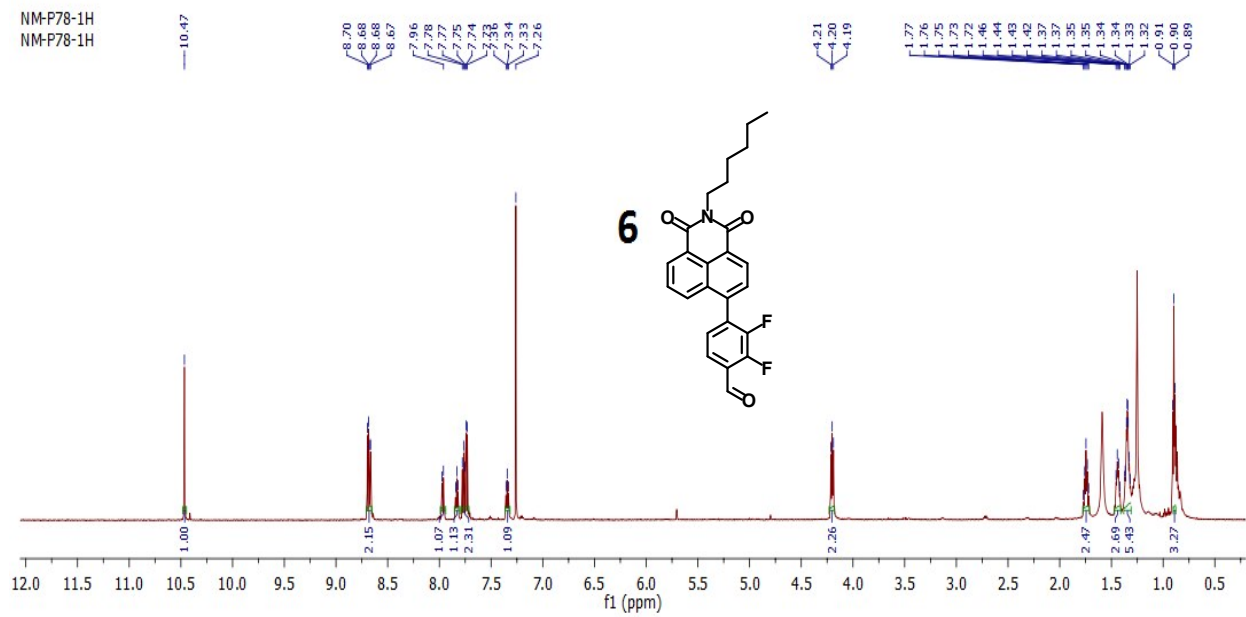

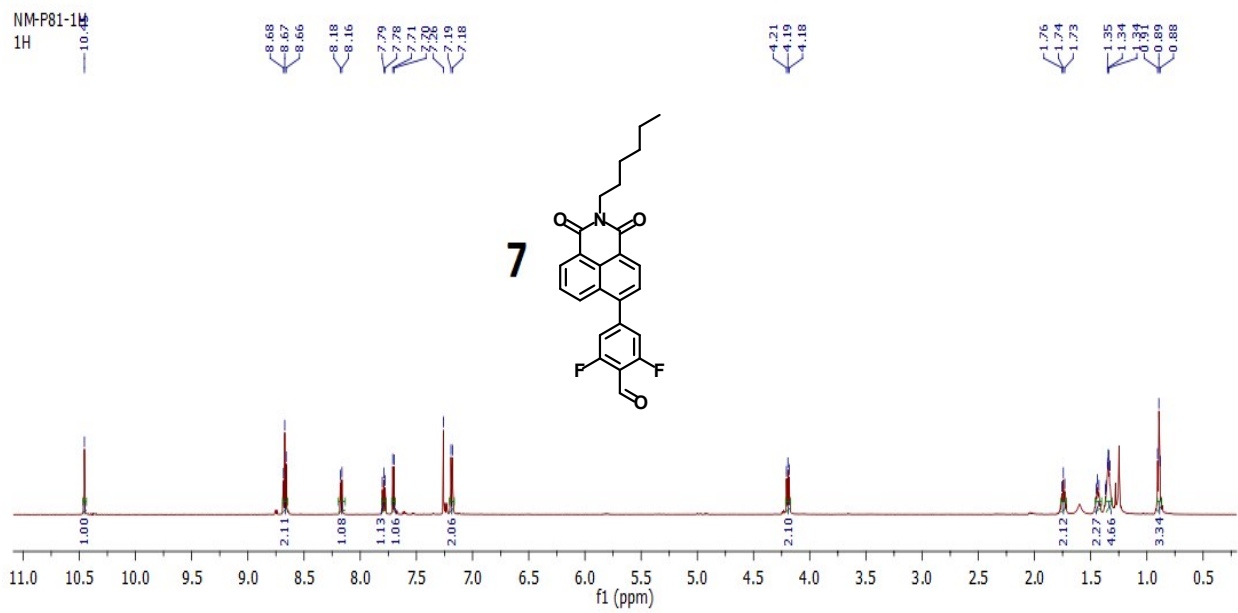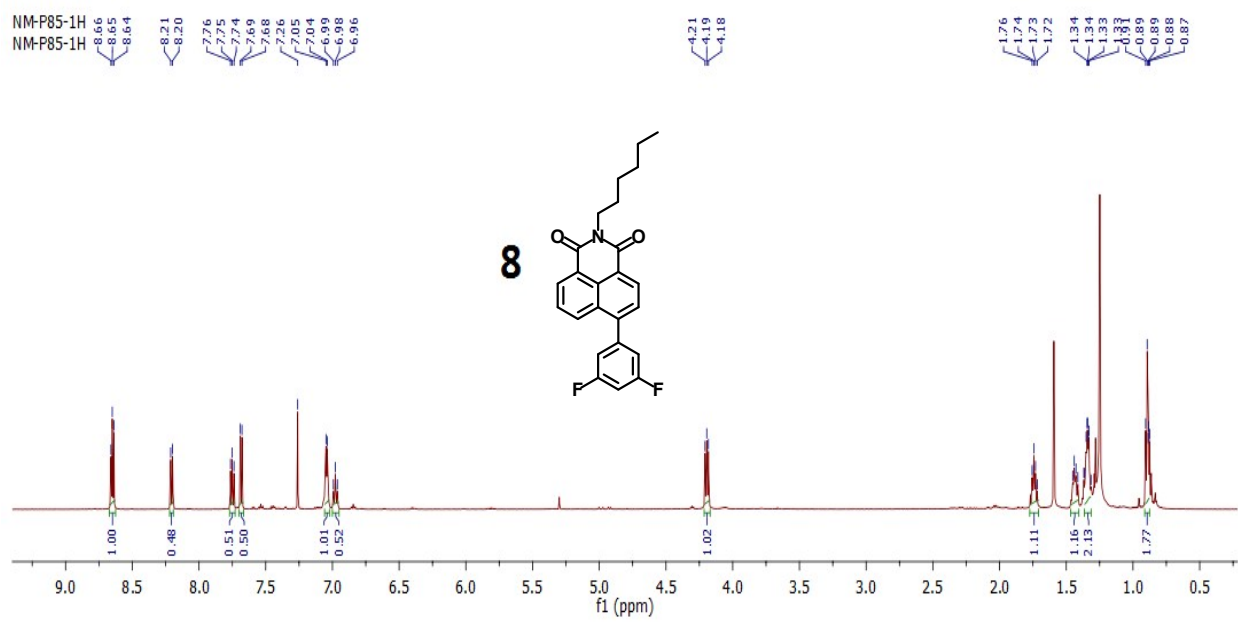

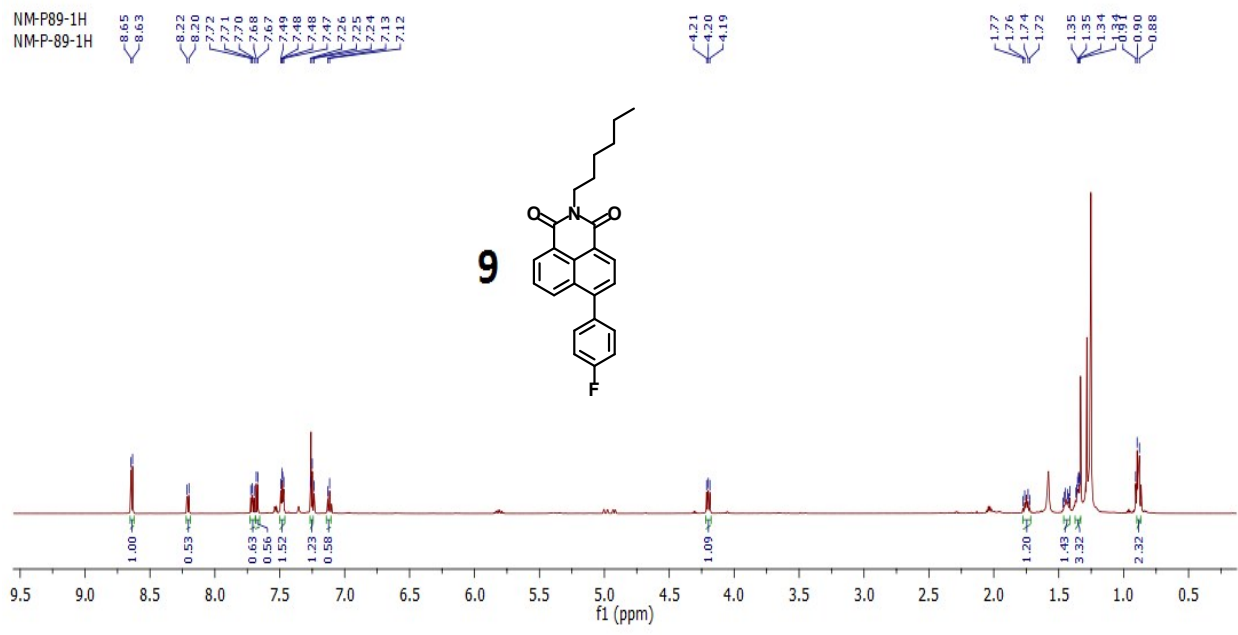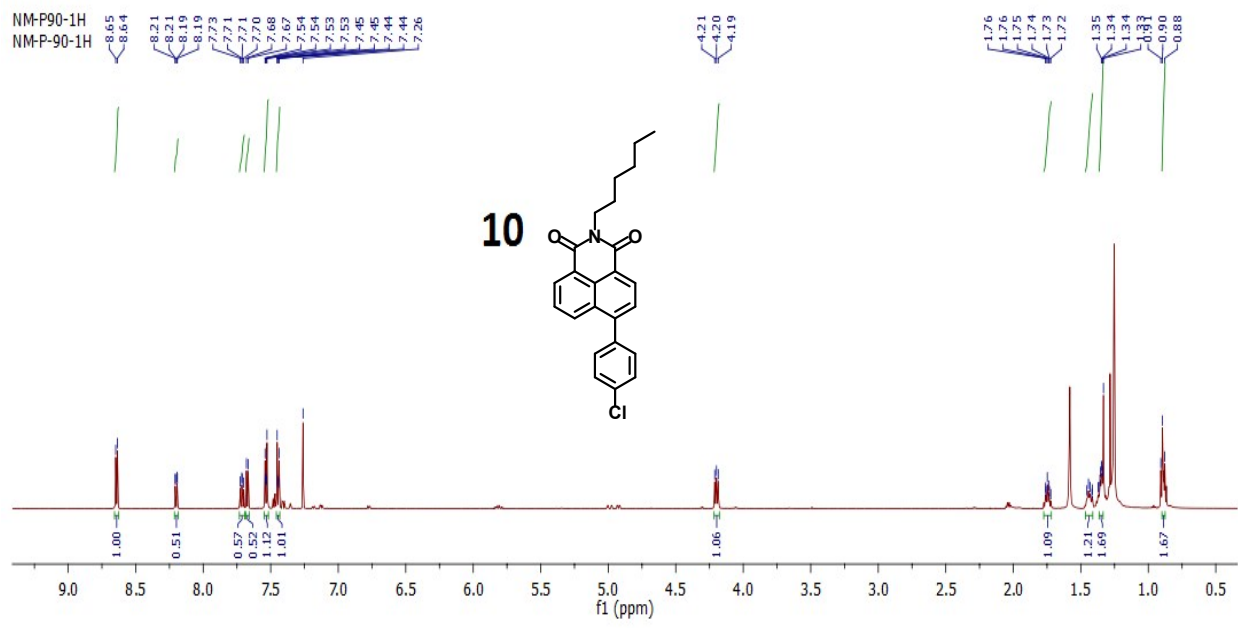



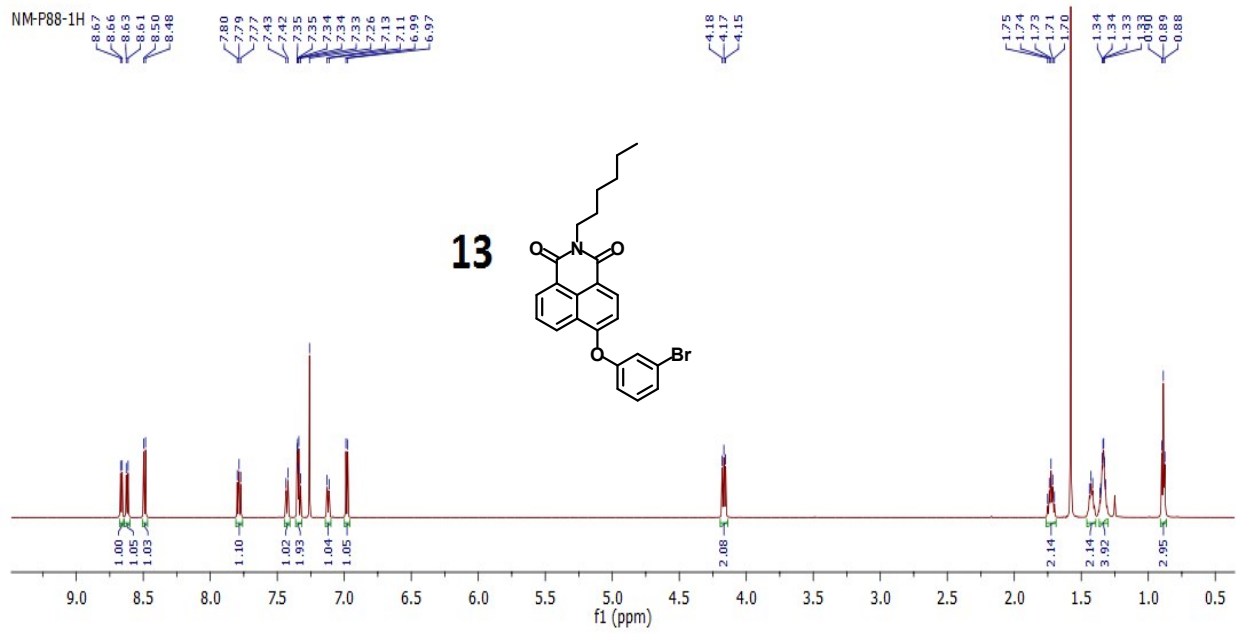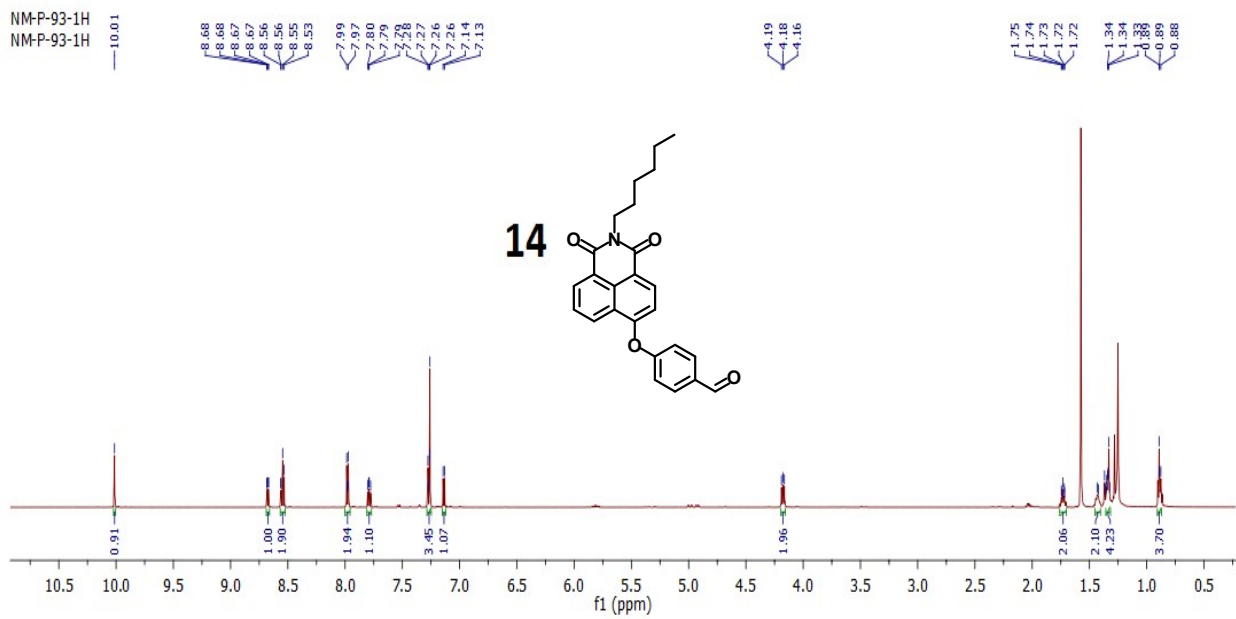

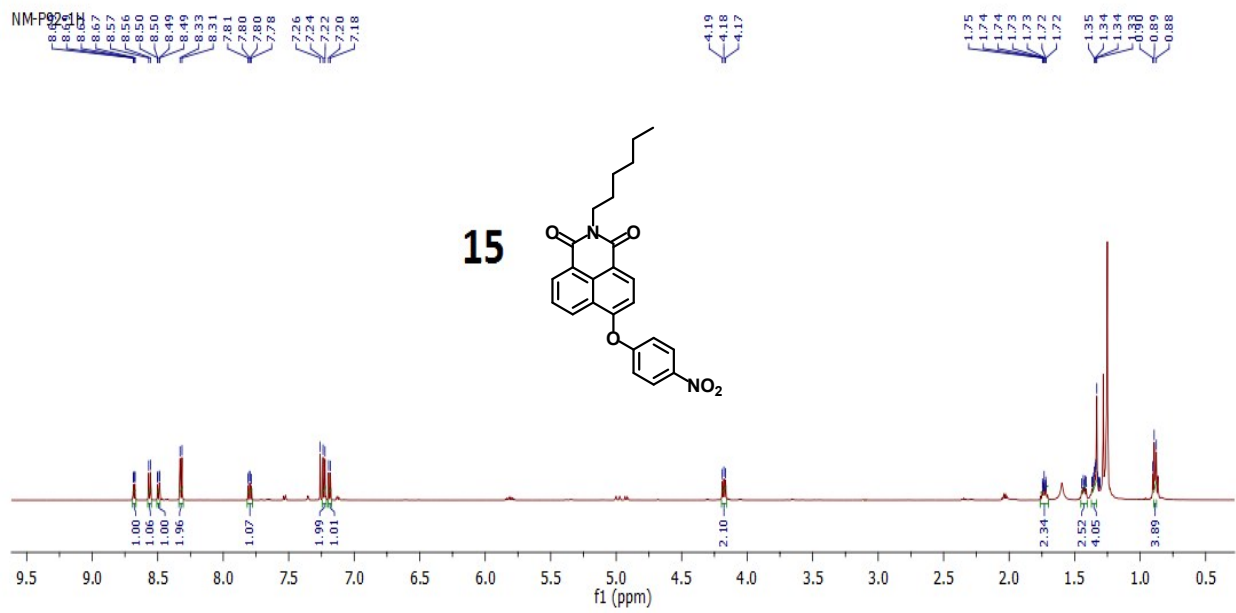

# <sup>13</sup>C NMR Spectra

NM-P30-13C  
NM-30-13C

163.56  
163.54

133.15  
131.99  
131.18  
131.09  
130.54  
128.97  
128.09  
123.14  
122.28

77.16

40.71

31.64  
28.11  
26.89  
22.68

14.18

HNIBr

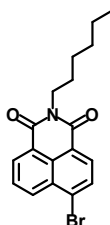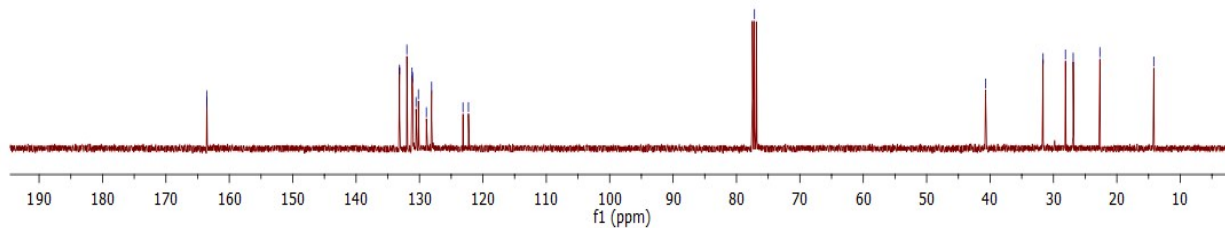

NM-P95-13C  
13C

164.32

133.96  
131.67  
131.29  
127.44  
127.04  
122.85

77.37  
77.16  
76.95

40.63

31.70  
28.20  
26.94

22.71

14.22

HNI

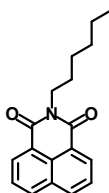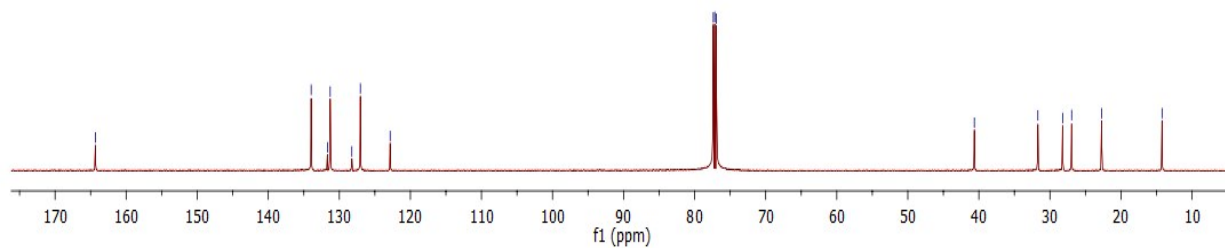



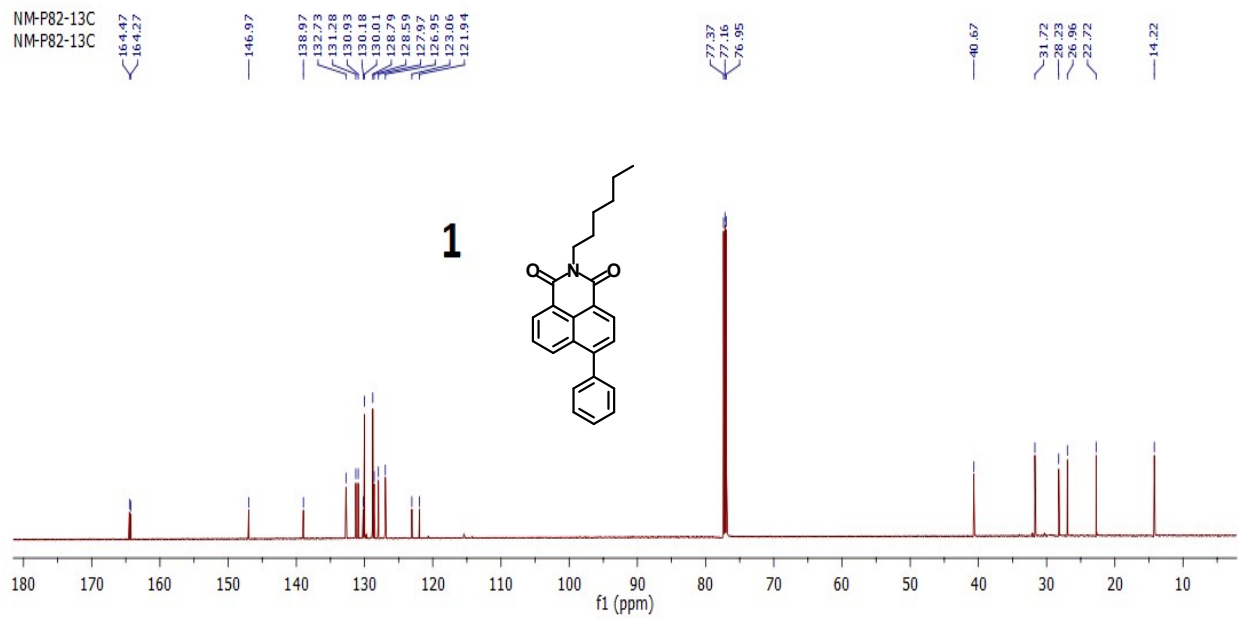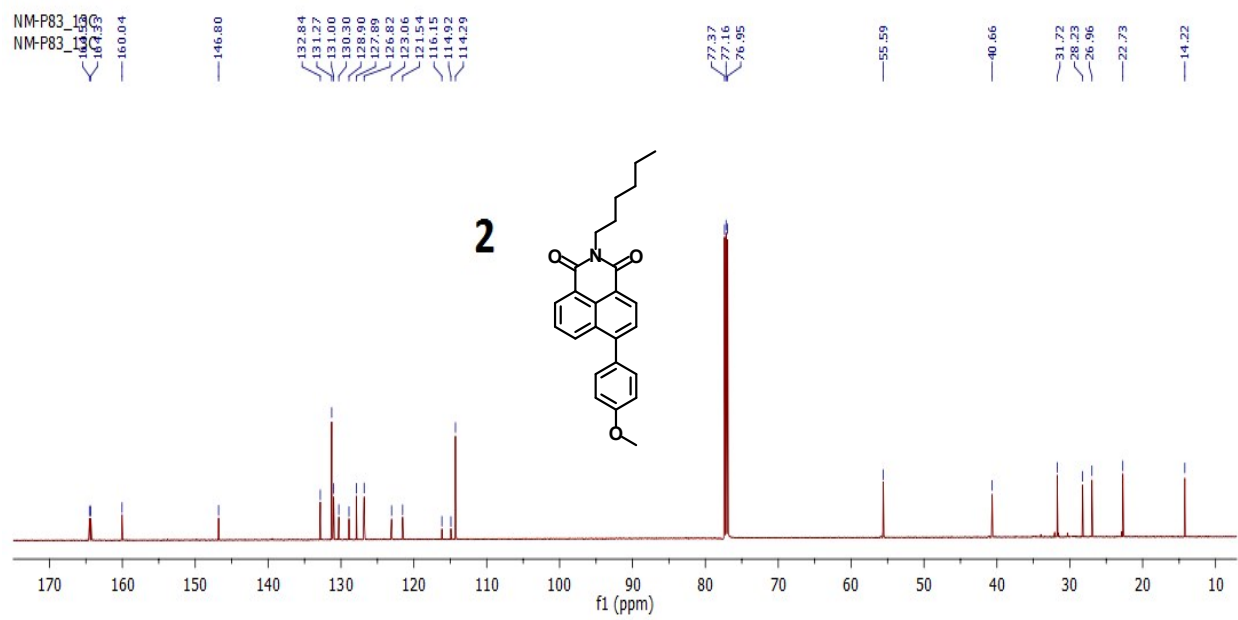

NM-P74-13C  
NM-P74-13C

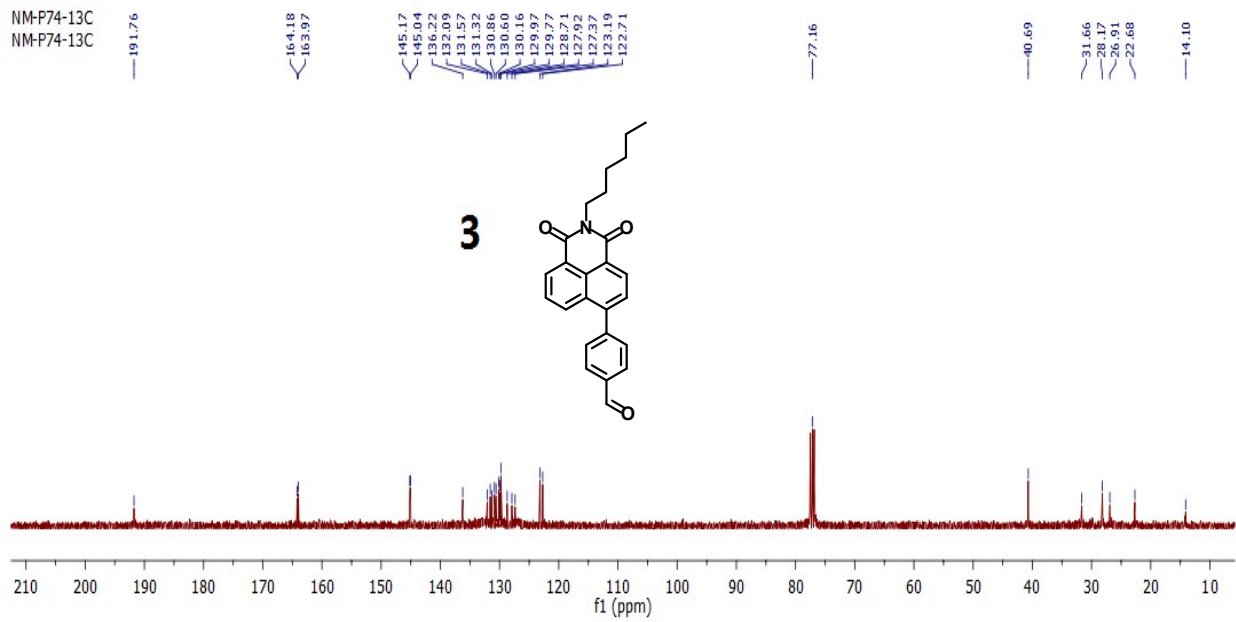

NM-P-77-13C  
NM-P-77-13C

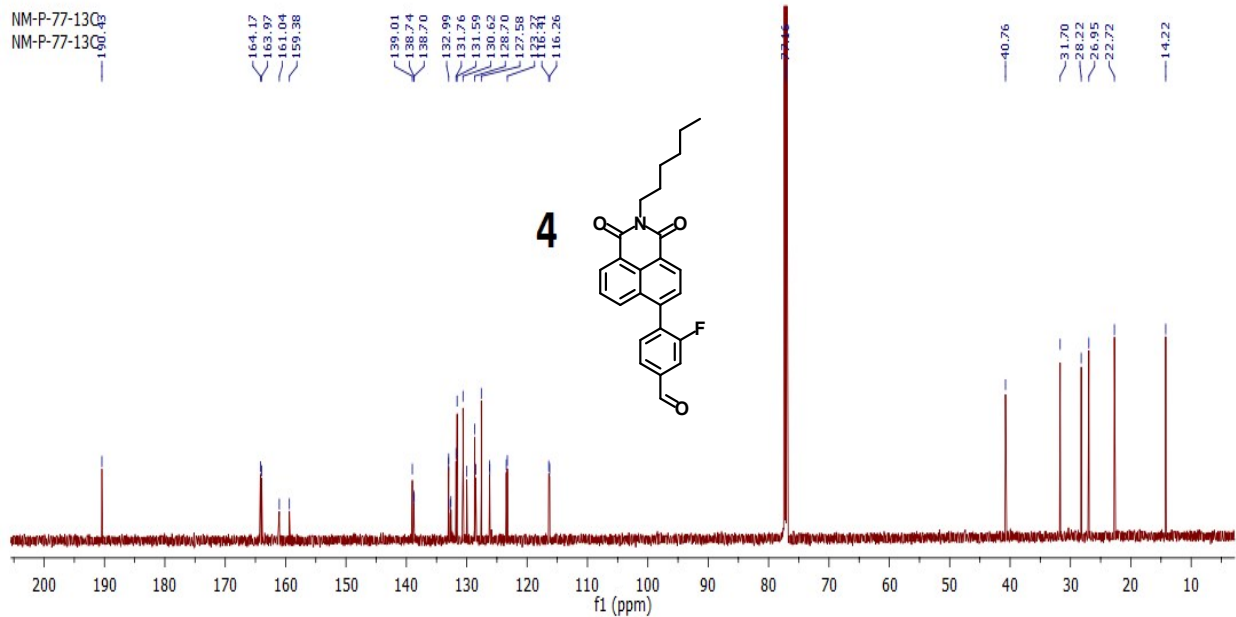

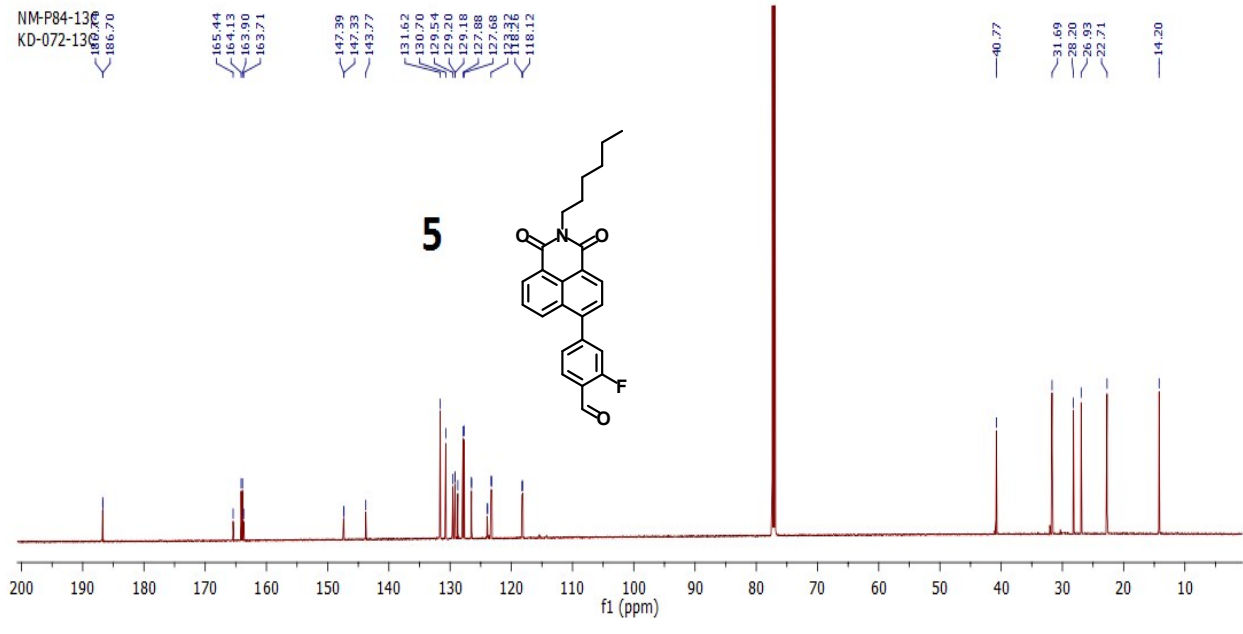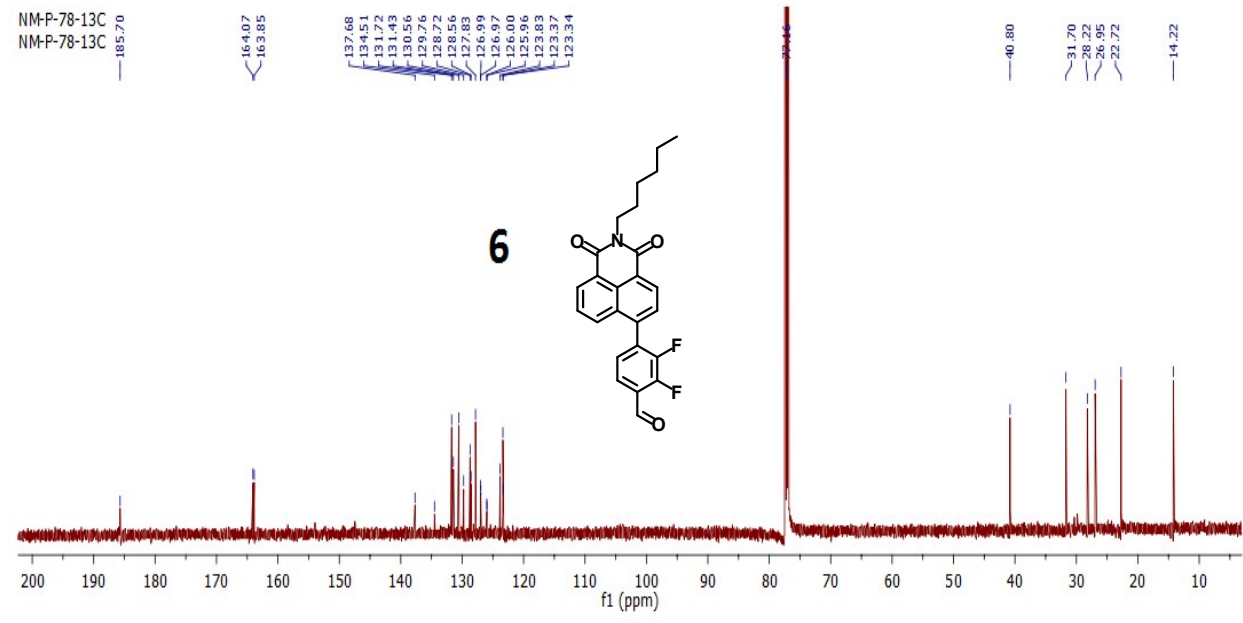

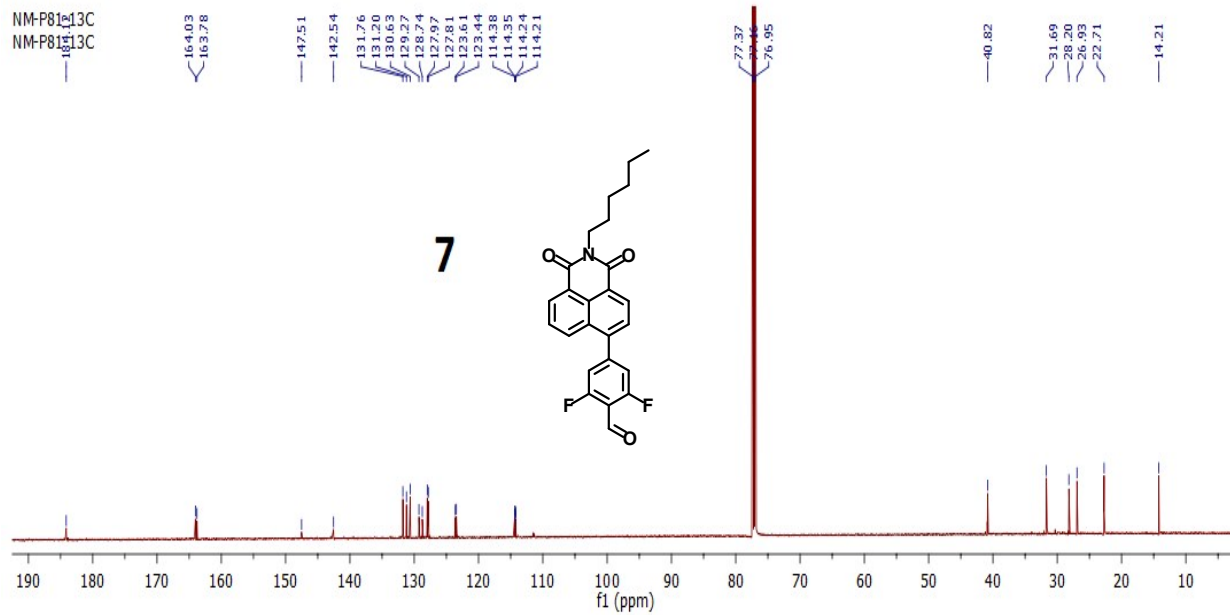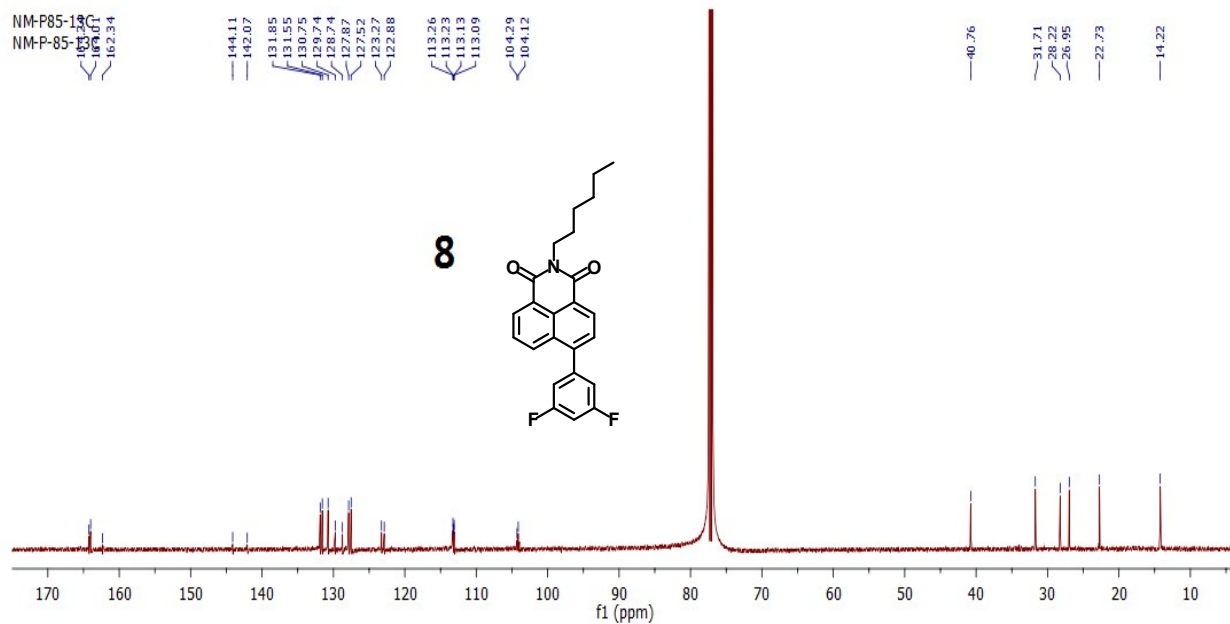

NM-P89-13C  
13C

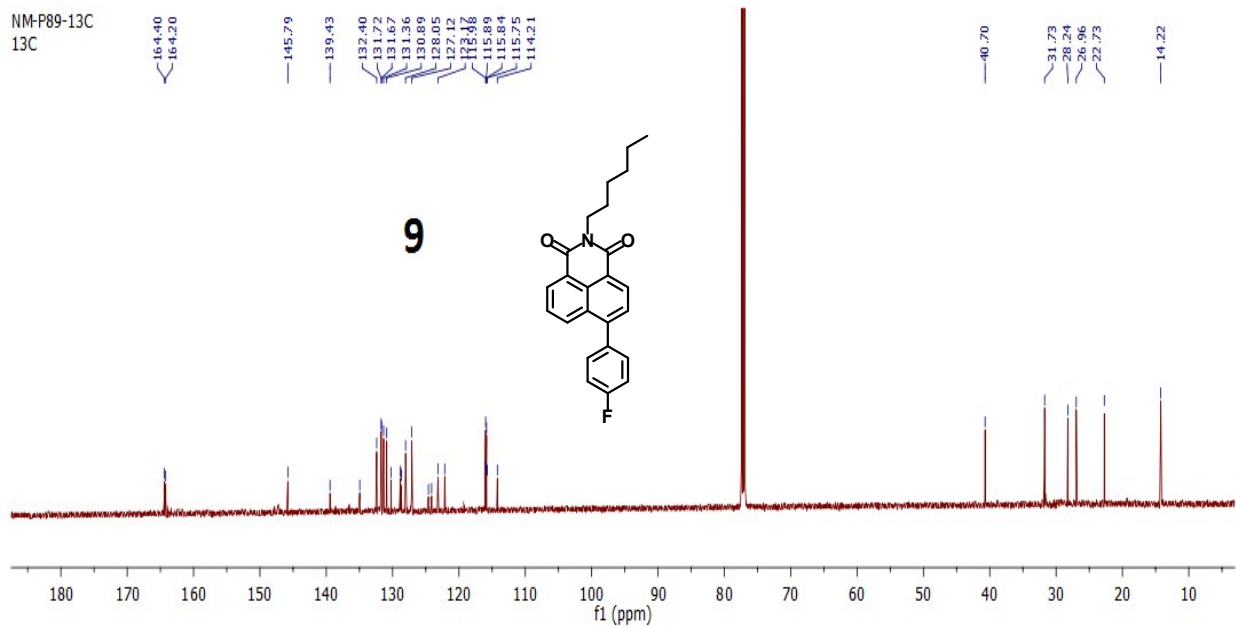

NM-P90-13C  
13C

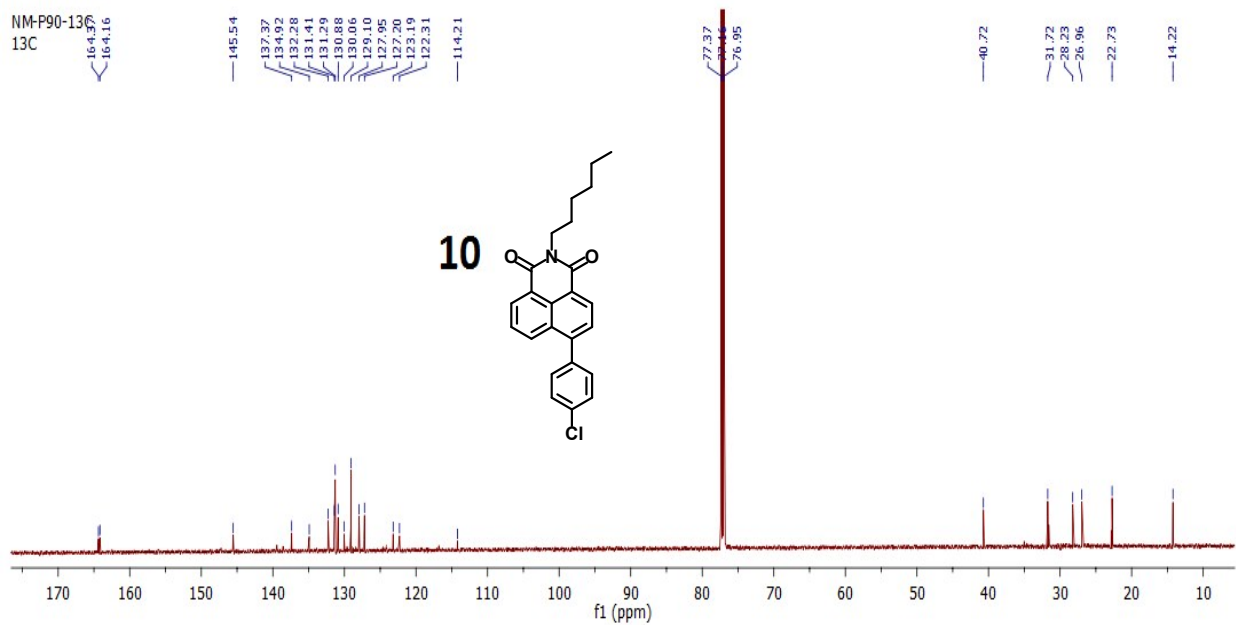

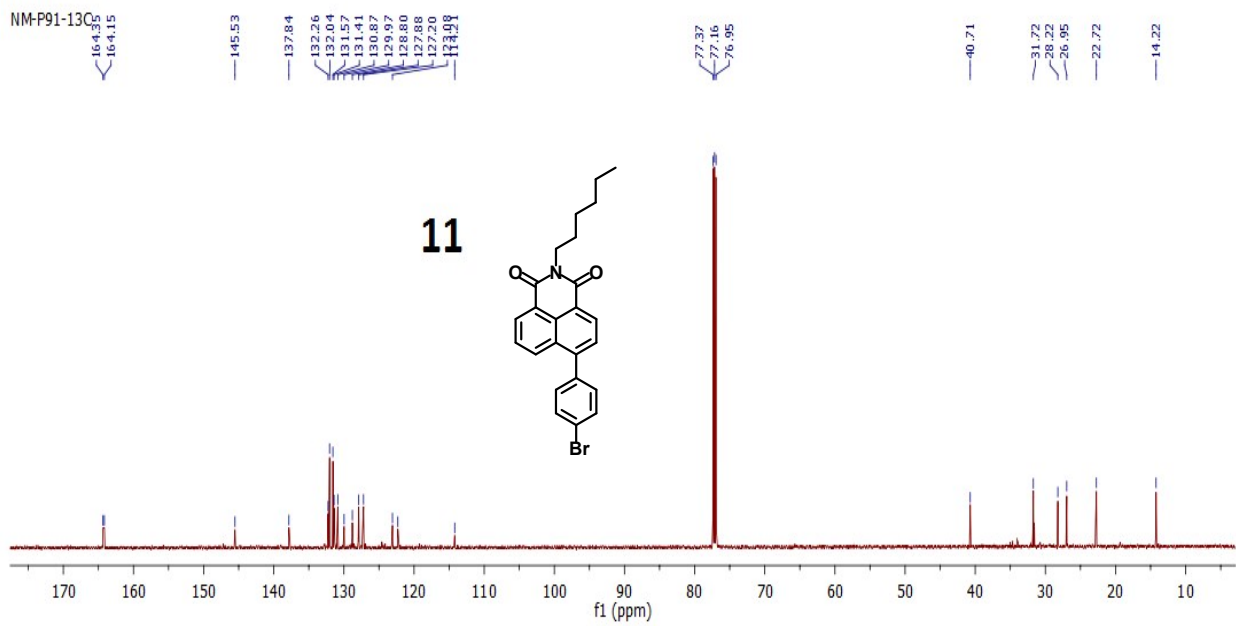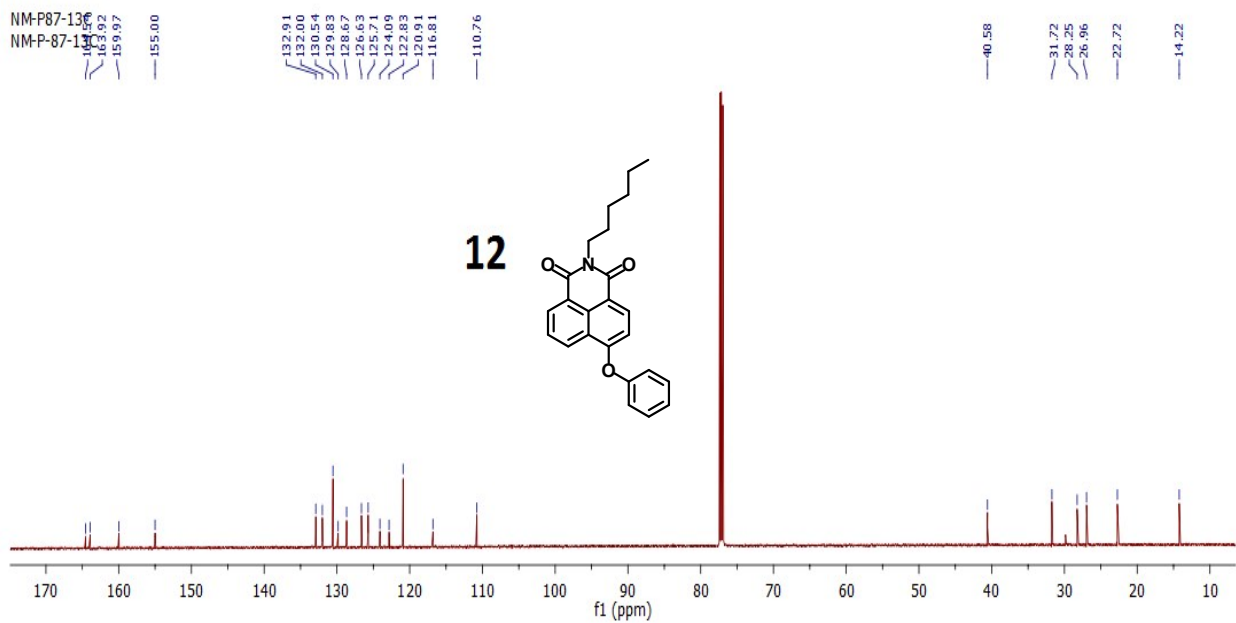

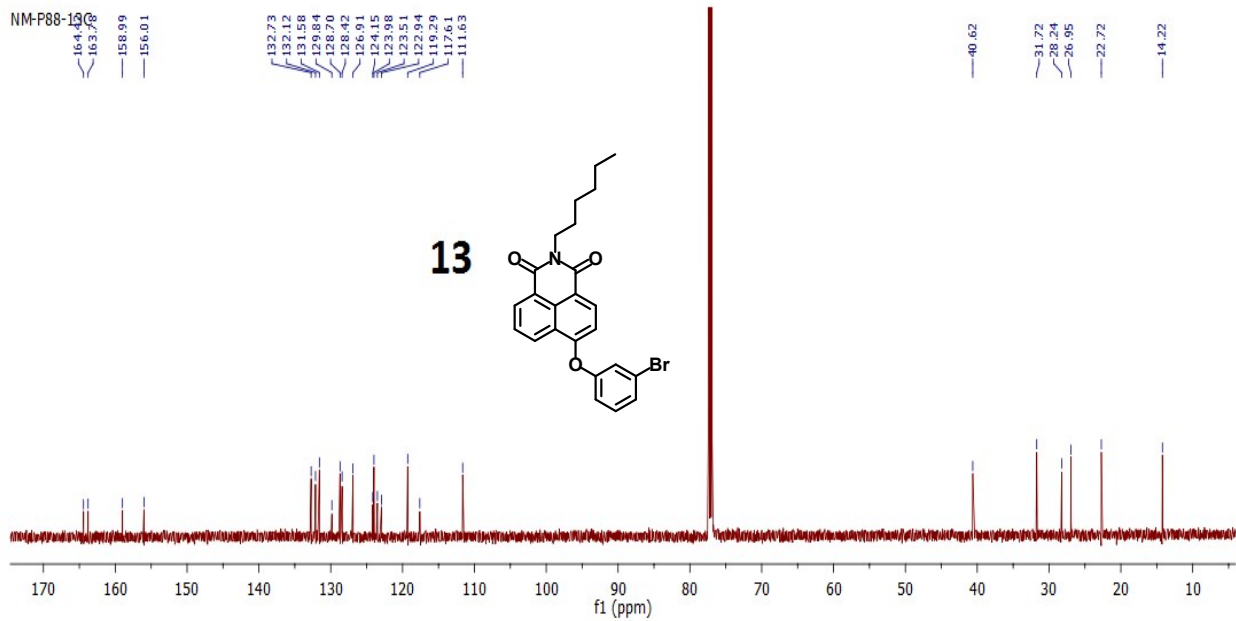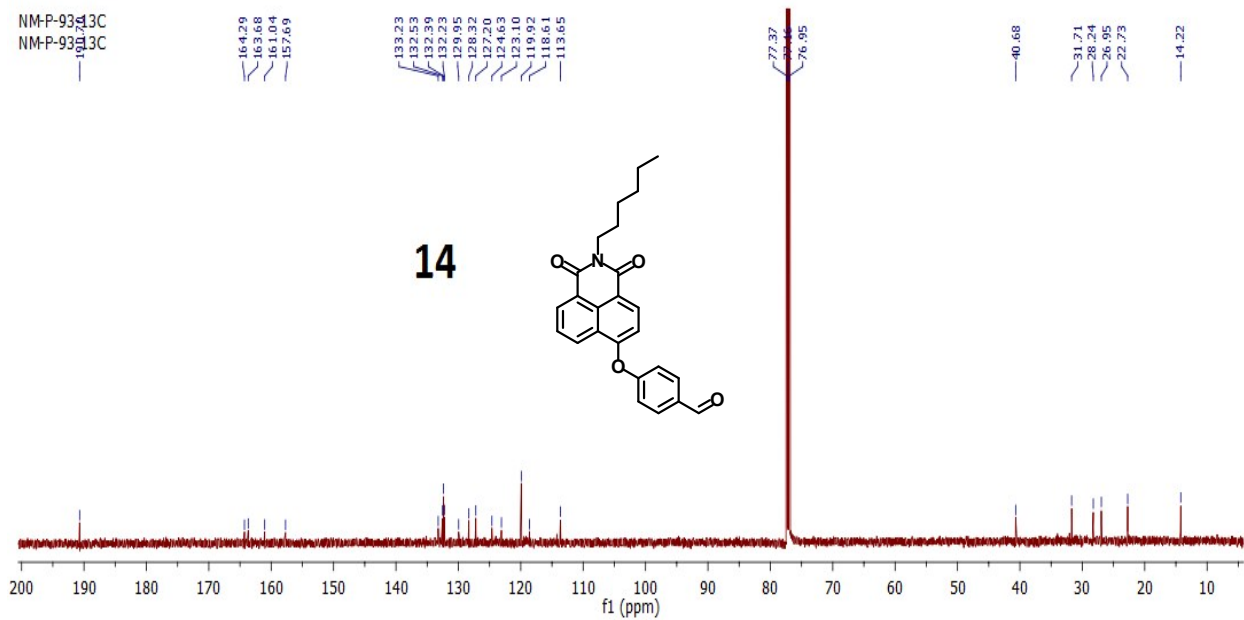

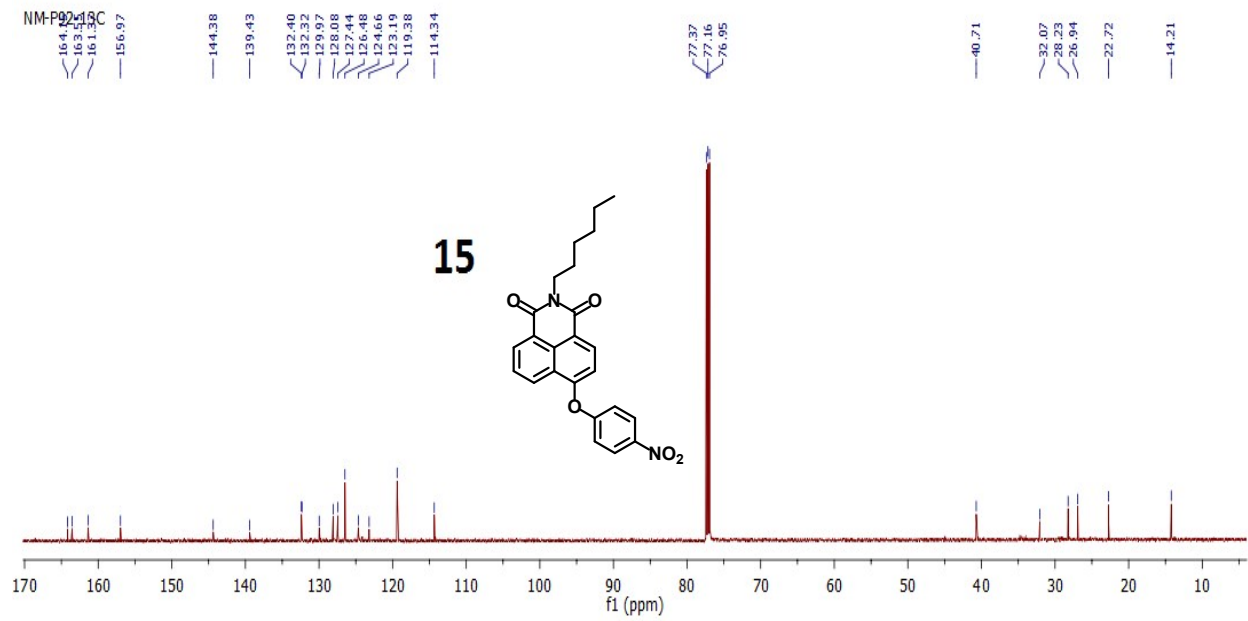



# <sup>19</sup>F NMR Spectra

NM-P77-19F  
NM-P77-19F

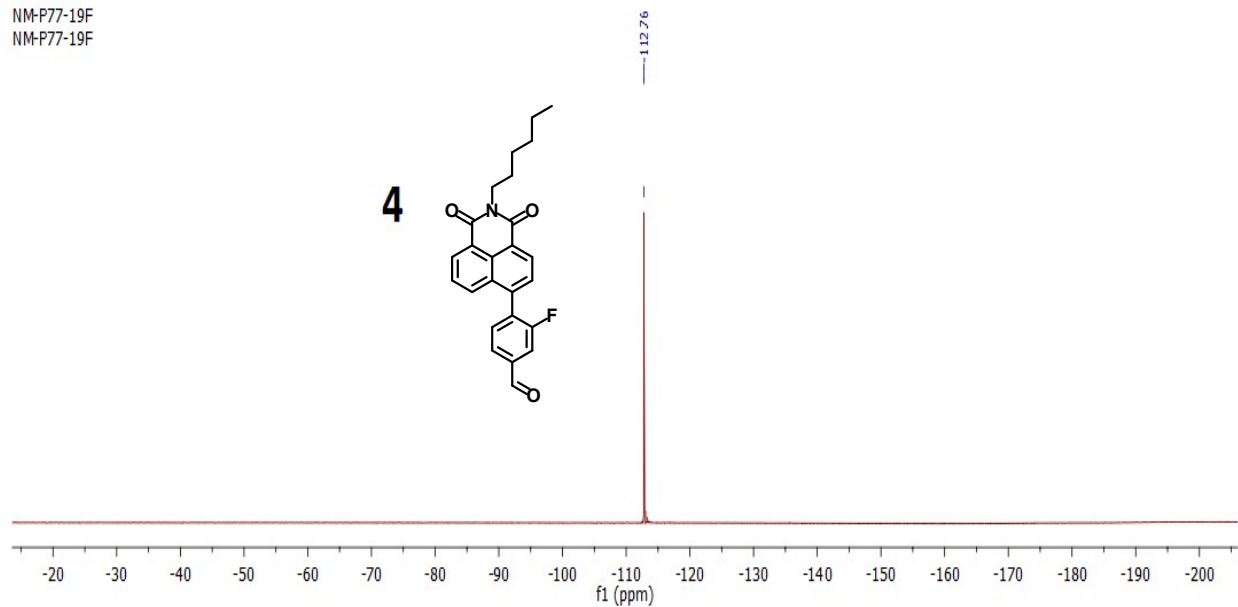

NM-P84-19F  
NM-P84-19F

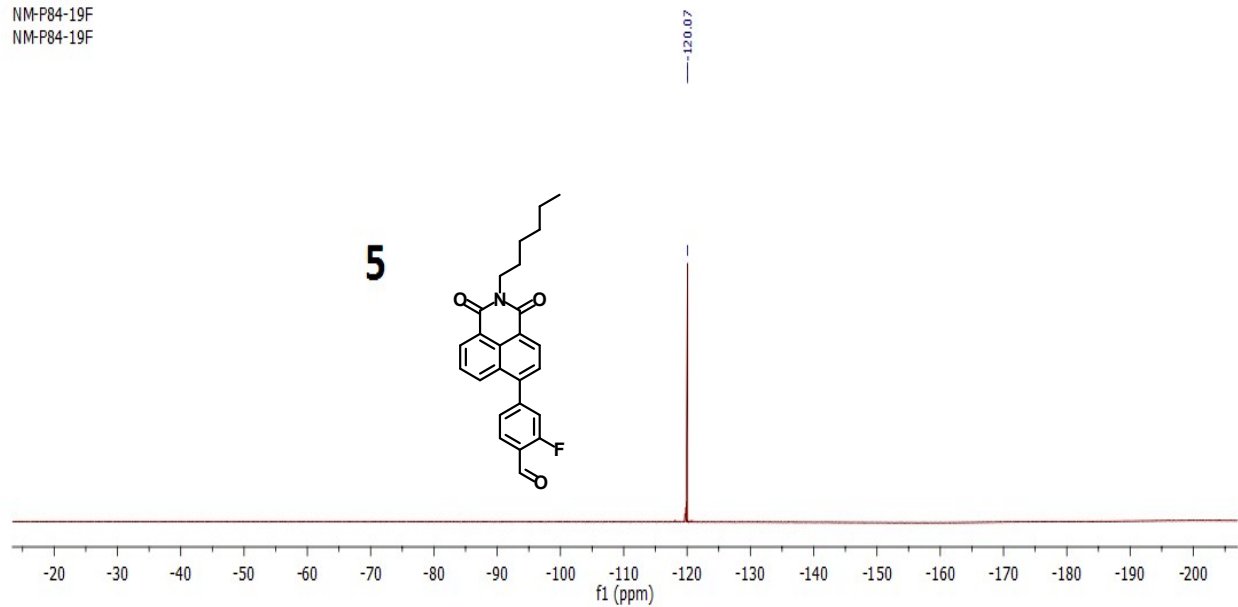

NM-P78-19F  
NM-P78-19F

138.60  
138.66  
144.80  
144.86

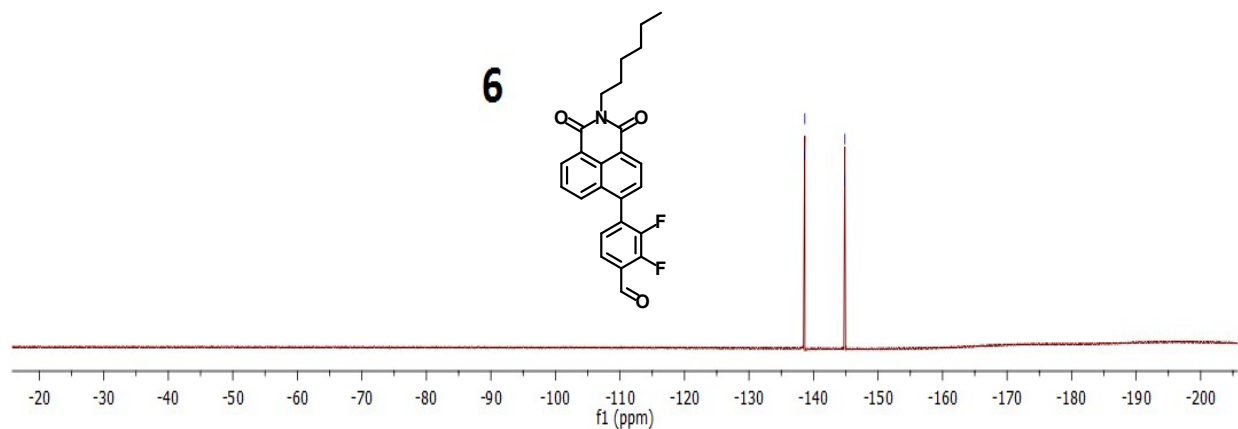

NM-P81-19F  
NM-P81-19F

114.85

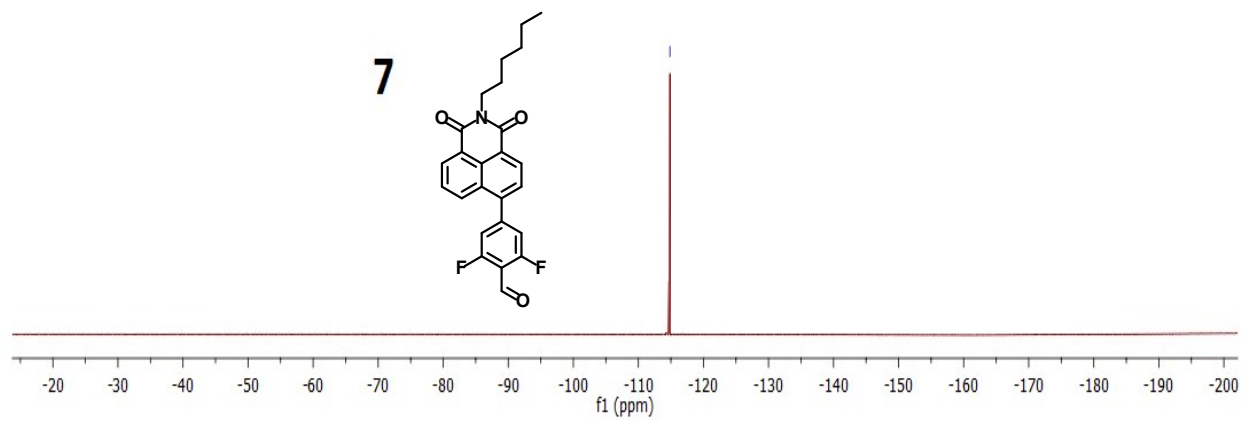

NM-P85-19F  
NM-P85-19F

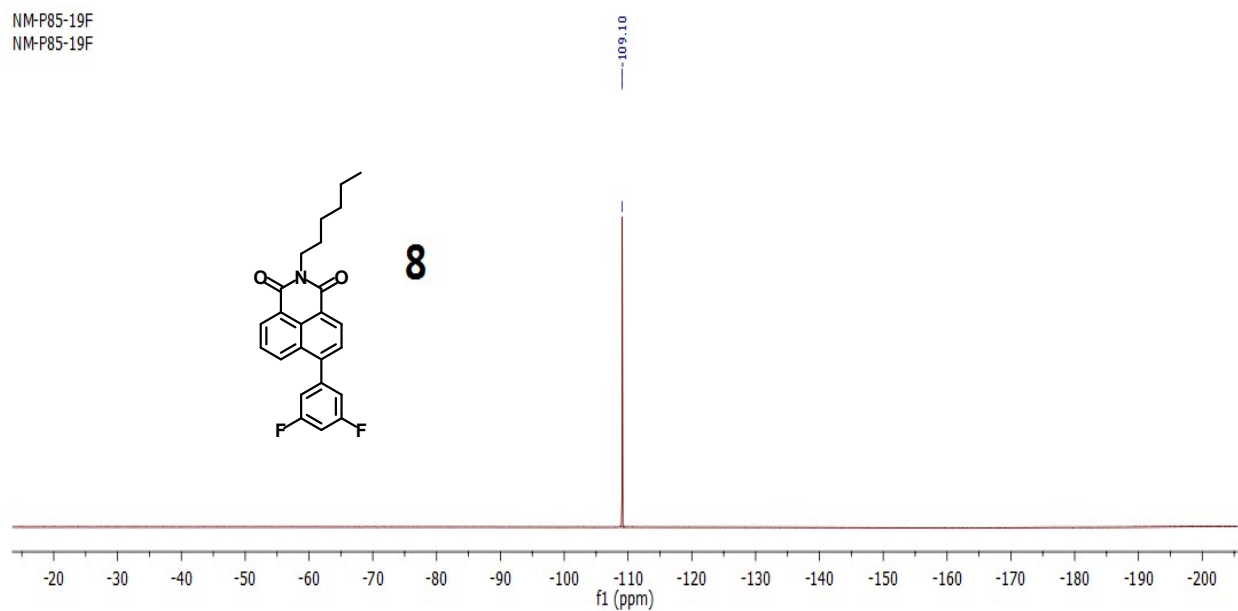

NM-P89-19F  
NM-P89-19F

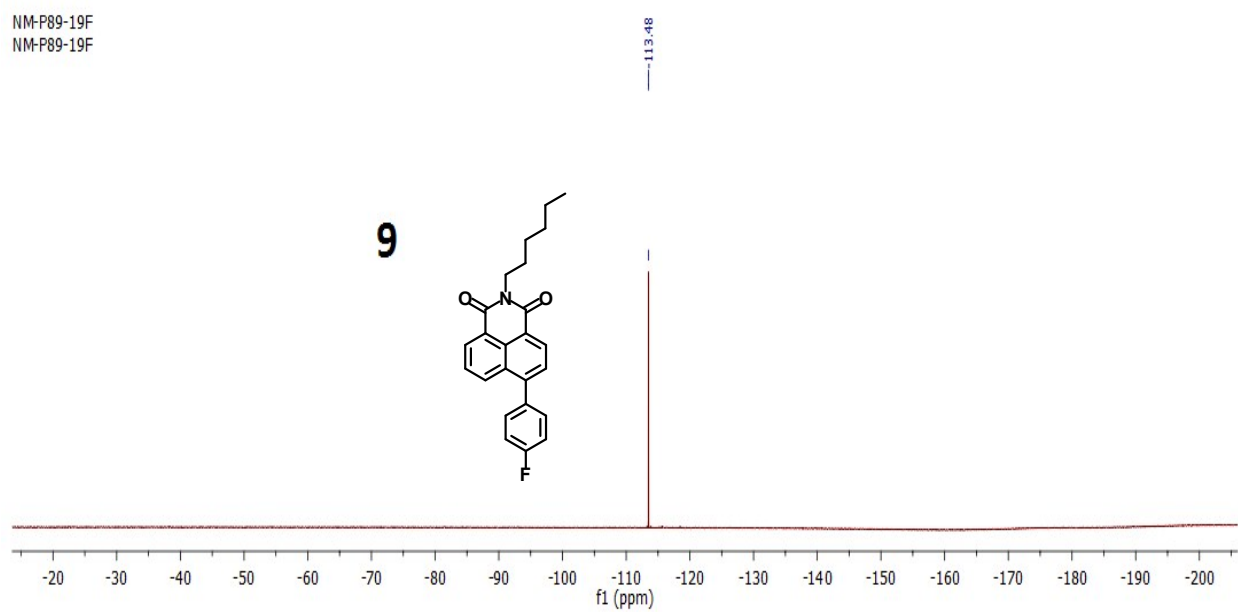

# Mass Spectra

| Sample Name   | Position    | Instrument Name | User Name              |
|---------------|-------------|-----------------|------------------------|
| Inj Vol       | InjPosition | SampleType      | IRM Calibration Status |
| Data Filename | ACQ Method  | Comment         | Acquired Time          |

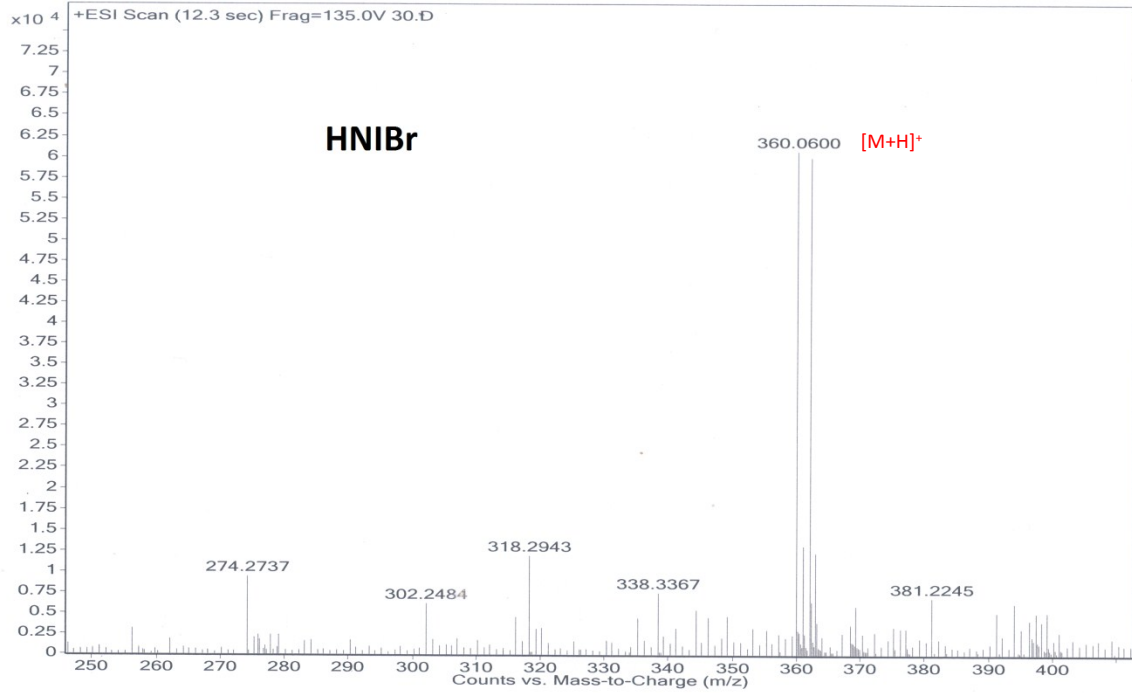

| Sample Name   | Position    | Vial 1 | Instrument Name | Instrument 1 | User Name              |
|---------------|-------------|--------|-----------------|--------------|------------------------|
| Inj Vol       | InjPosition |        | SampleType      | Sample       | IRM Calibration Status |
| Data Filename | ACQ Method  |        | Comment         |              | Acquired Time          |

All Ions Missed  
1/17/2018 3:37:47 PM

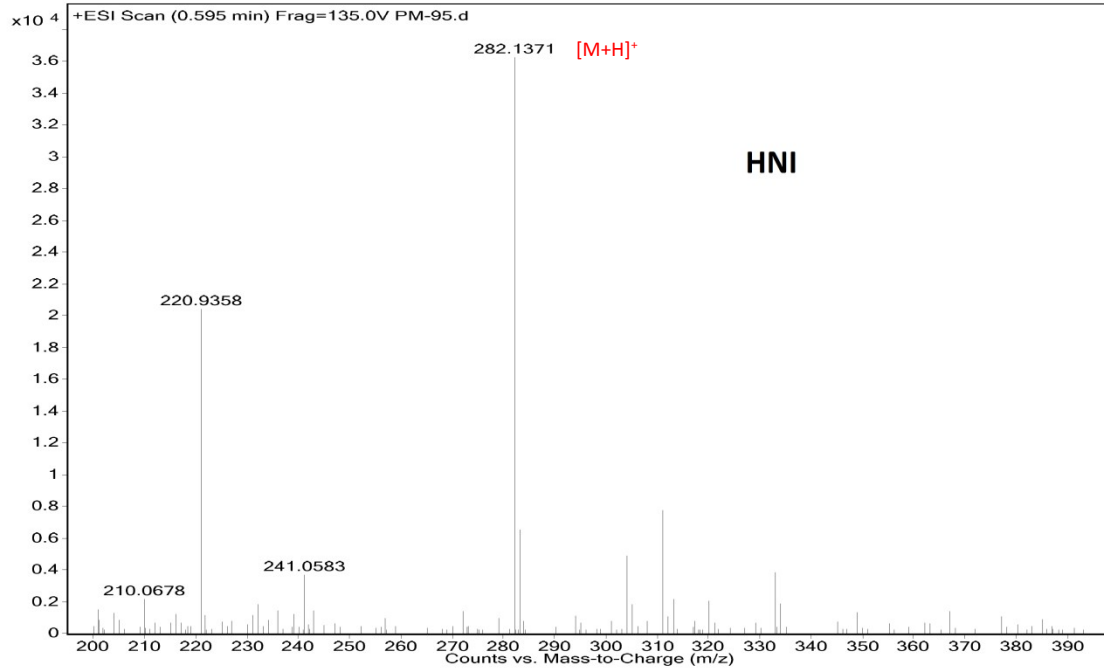

|                      |             |                    |             |                        |                                   |                               |                  |
|----------------------|-------------|--------------------|-------------|------------------------|-----------------------------------|-------------------------------|------------------|
| <b>Sample Name</b>   | Unavailable | <b>Position</b>    | Unavailable | <b>Instrument Name</b> | Unavailable                       | <b>User Name</b>              | Unavailable      |
| <b>Inj Vol</b>       | Unavailable | <b>InjPosition</b> | Unavailable | <b>SampleType</b>      | Unavailable                       | <b>IRM Calibration Status</b> | Some Ions Missed |
| <b>Data Filename</b> | P82.d       | <b>ACQ Method</b>  |             | <b>Comment</b>         | Sample information is unavailable | <b>Acquired Time</b>          | Unavailable      |

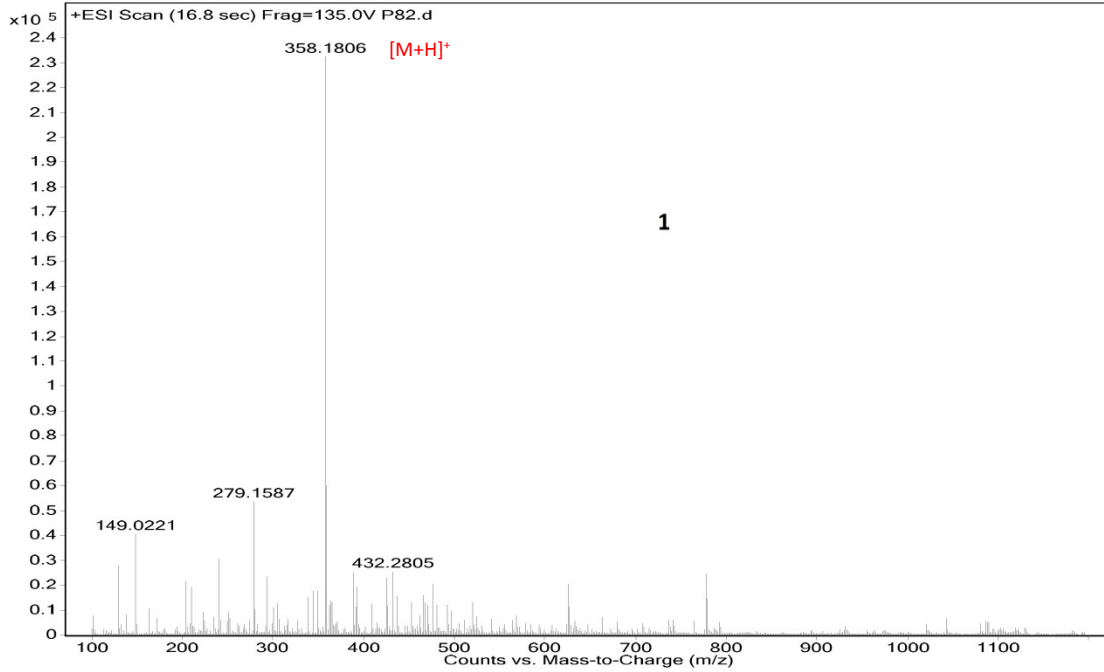

|                      |             |                    |             |                        |                                   |                               |                  |
|----------------------|-------------|--------------------|-------------|------------------------|-----------------------------------|-------------------------------|------------------|
| <b>Sample Name</b>   | Unavailable | <b>Position</b>    | Unavailable | <b>Instrument Name</b> | Unavailable                       | <b>User Name</b>              | Unavailable      |
| <b>Inj Vol</b>       | Unavailable | <b>InjPosition</b> | Unavailable | <b>SampleType</b>      | Unavailable                       | <b>IRM Calibration Status</b> | Some Ions Missed |
| <b>Data Filename</b> | P83.d       | <b>ACQ Method</b>  |             | <b>Comment</b>         | Sample information is unavailable | <b>Acquired Time</b>          | Unavailable      |

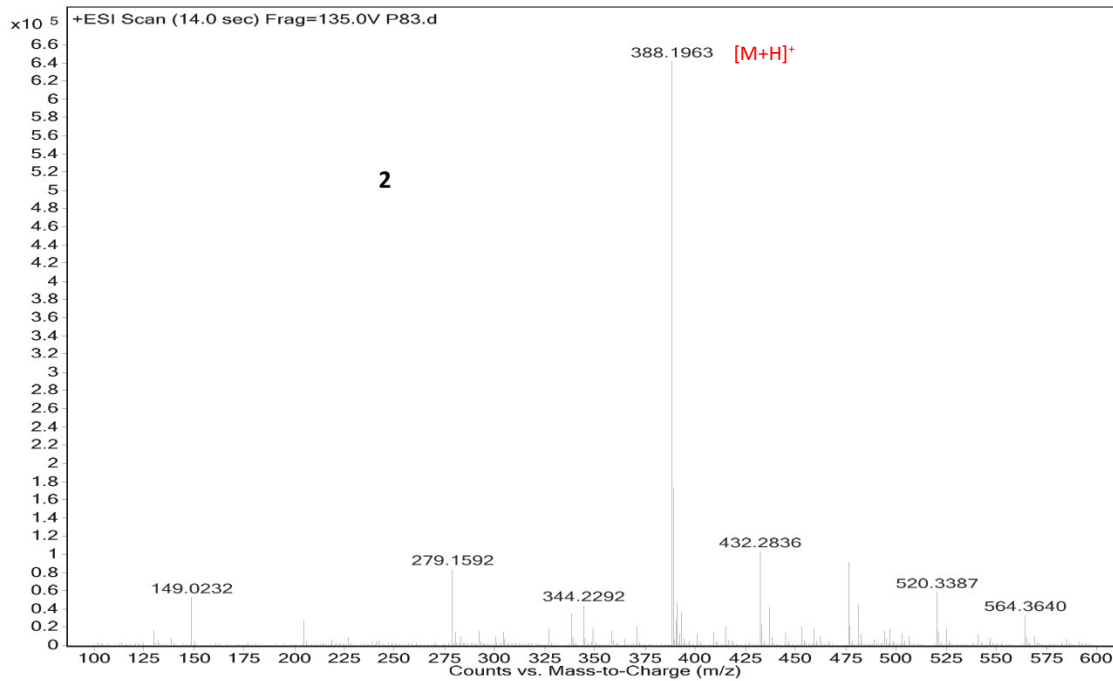

|                      |             |                    |             |                        |                                   |                               |                 |
|----------------------|-------------|--------------------|-------------|------------------------|-----------------------------------|-------------------------------|-----------------|
| <b>Sample Name</b>   | Unavailable | <b>Position</b>    | Unavailable | <b>Instrument Name</b> | Unavailable                       | <b>User Name</b>              | Unavailable     |
| <b>Inj Vol</b>       | Unavailable | <b>InjPosition</b> | Unavailable | <b>SampleType</b>      | Unavailable                       | <b>IRM Calibration Status</b> | All Ions Missed |
| <b>Data Filename</b> | P74-1.d     | <b>ACQ Method</b>  |             | <b>Comment</b>         | Sample information is unavailable | <b>Acquired Time</b>          | Unavailable     |

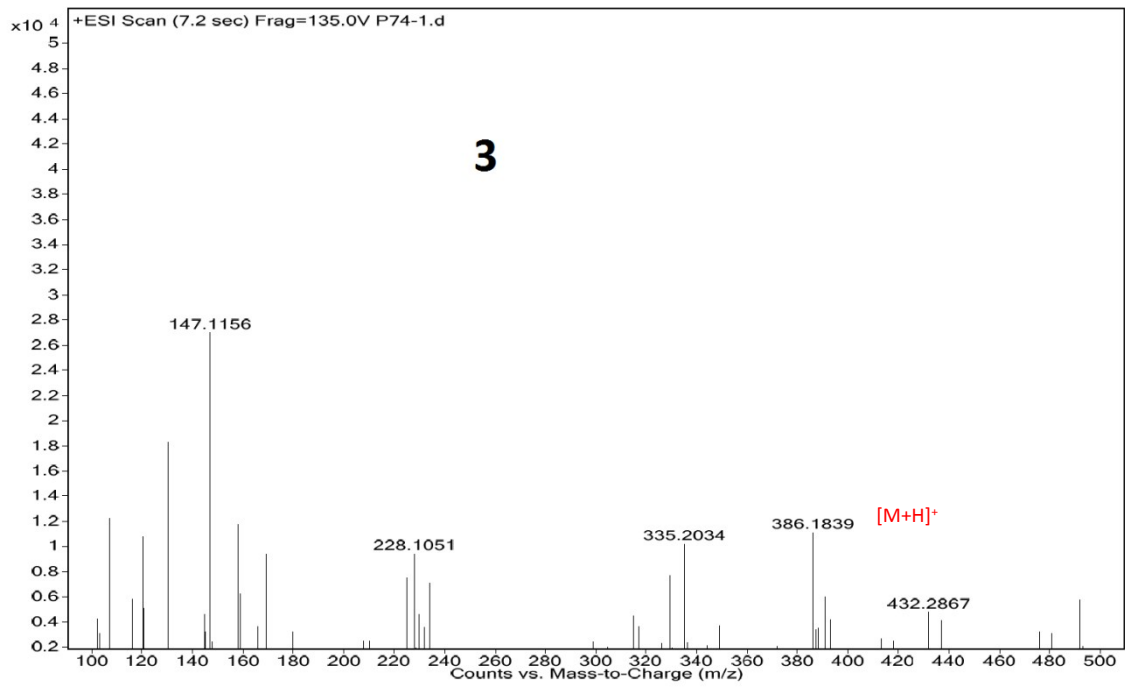

|                      |  |                    |  |                        |  |                               |  |
|----------------------|--|--------------------|--|------------------------|--|-------------------------------|--|
| <b>Sample Name</b>   |  | <b>Position</b>    |  | <b>Instrument Name</b> |  | <b>User Name</b>              |  |
| <b>Inj Vol</b>       |  | <b>InjPosition</b> |  | <b>SampleType</b>      |  | <b>IRM Calibration Status</b> |  |
| <b>Data Filename</b> |  | <b>ACQ Method</b>  |  | <b>Comment</b>         |  | <b>Acquired Time</b>          |  |

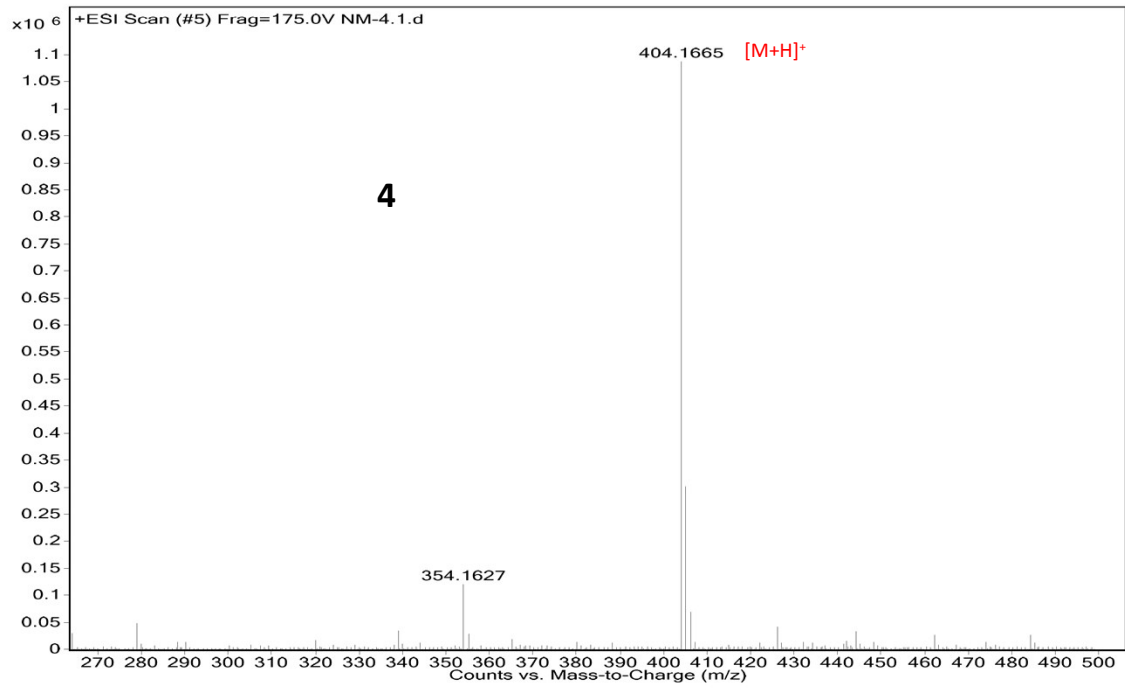

|               |       |             |        |                 |              |                        |                     |
|---------------|-------|-------------|--------|-----------------|--------------|------------------------|---------------------|
| Sample Name   | P84   | Position    | Vial 1 | Instrument Name | Instrument 1 | User Name              |                     |
| Inj Vol       | 0     | InjPosition |        | SampleType      | Sample       | IRM Calibration Status | Some Ions Missed    |
| Data Filename | P84.d | ACQ Method  |        | Comment         |              | Acquired Time          | 8/7/2017 3:52:15 PM |

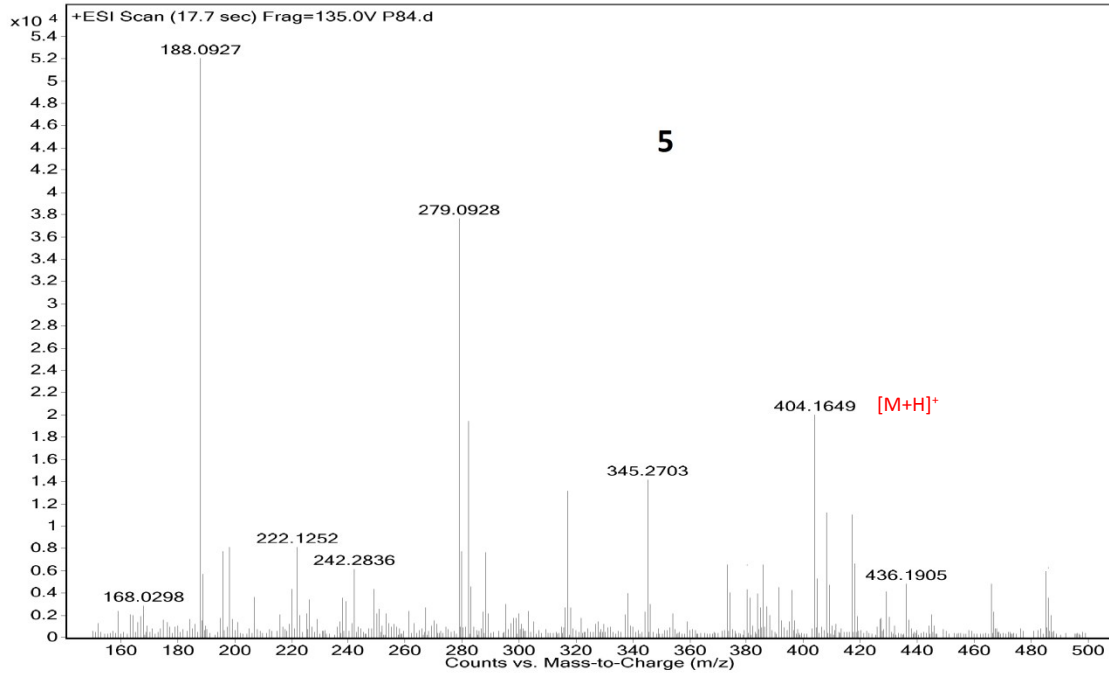

|               |        |             |        |                 |              |                        |                      |
|---------------|--------|-------------|--------|-----------------|--------------|------------------------|----------------------|
| Sample Name   | P-78   | Position    | Vial 1 | Instrument Name | Instrument 1 | User Name              |                      |
| Inj Vol       | 0      | InjPosition |        | SampleType      | Sample       | IRM Calibration Status | All Ions Missed      |
| Data Filename | P-78.d | ACQ Method  |        | Comment         |              | Acquired Time          | 6/5/2017 12:02:28 PM |

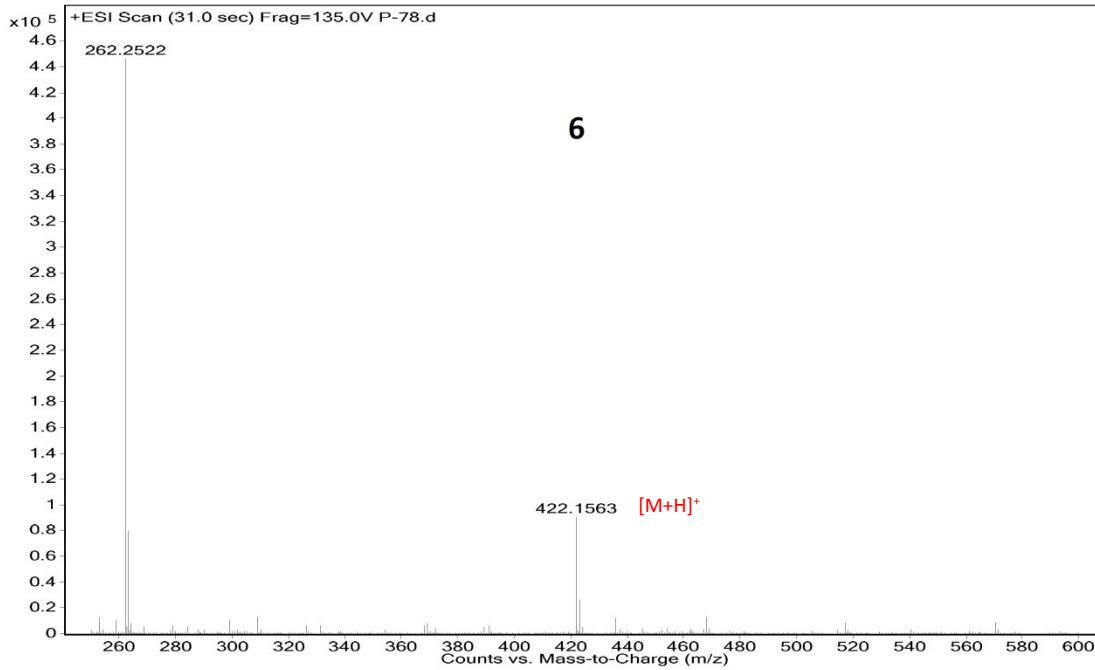

Sample Name  
Inj Vol  
Data Filename

Position  
InjPosition  
ACQ Method

Instrument Name  
SampleType  
Comment

User Name  
IRM Calibration Status  
Acquired Time

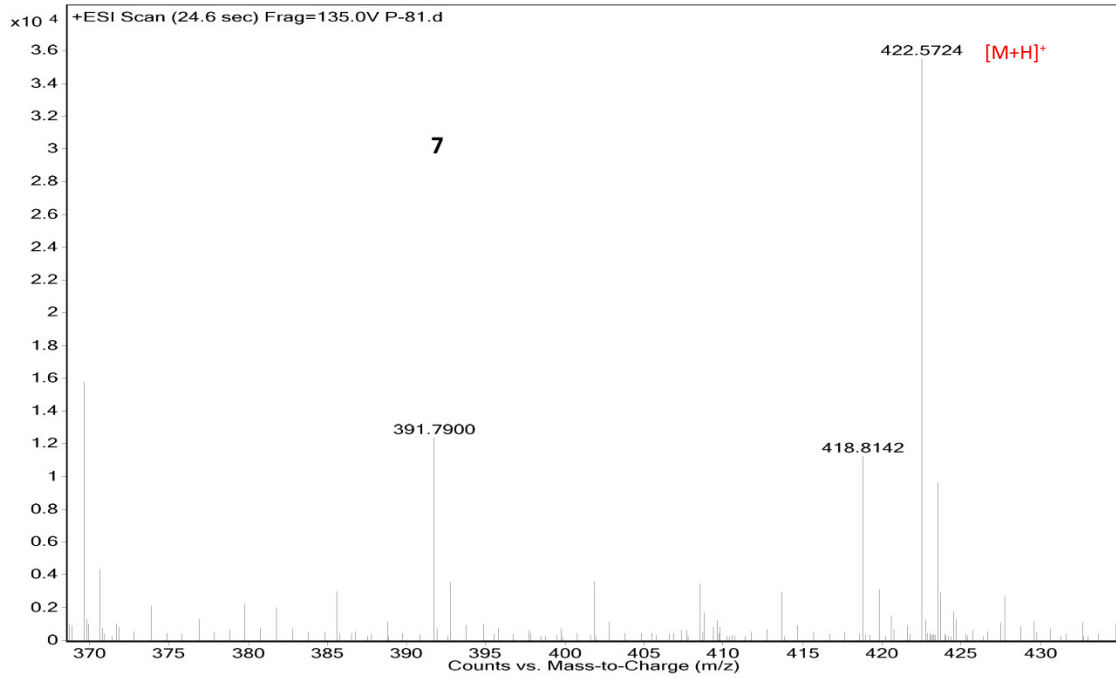

Sample Name P85  
Inj Vol 0  
Data Filename P85.d

Position Vial 1  
InjPosition  
ACQ Method

Instrument Name Instrument 1  
SampleType Sample  
Comment

User Name  
IRM Calibration Status Some Ions Missed  
Acquired Time 8/7/2017 3:54:17 PM

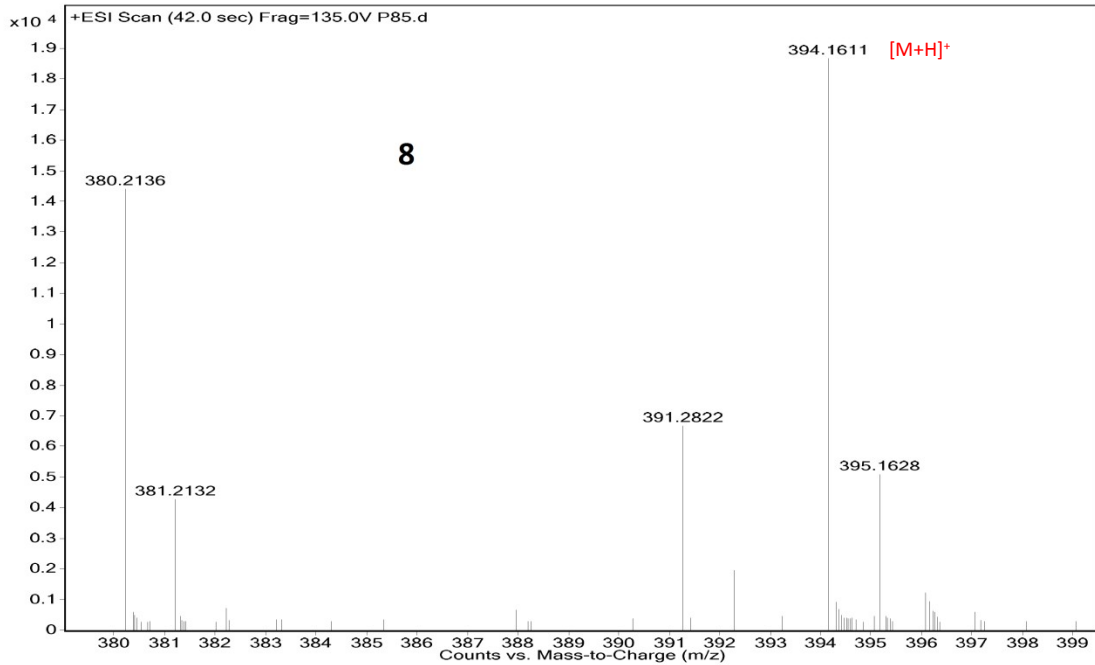



|                      |             |                    |             |                        |                                   |                               |                  |
|----------------------|-------------|--------------------|-------------|------------------------|-----------------------------------|-------------------------------|------------------|
| <b>Sample Name</b>   | Unavailable | <b>Position</b>    | Unavailable | <b>Instrument Name</b> | Unavailable                       | <b>User Name</b>              | Unavailable      |
| <b>Inj Vol</b>       | Unavailable | <b>InjPosition</b> | Unavailable | <b>SampleType</b>      | Unavailable                       | <b>IRM Calibration Status</b> | Some Ions Missed |
| <b>Data Filename</b> | P-89.d      | <b>ACQ Method</b>  |             | <b>Comment</b>         | Sample information is unavailable | <b>Acquired Time</b>          | Unavailable      |

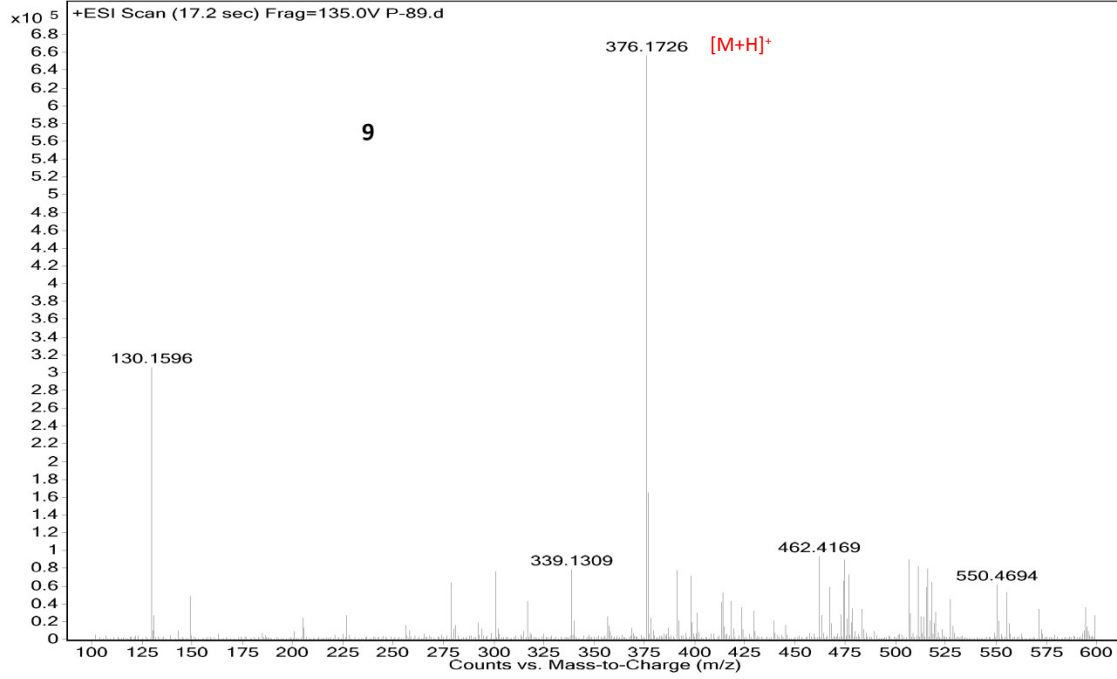

|                      |             |                    |             |                        |                                   |                               |                  |
|----------------------|-------------|--------------------|-------------|------------------------|-----------------------------------|-------------------------------|------------------|
| <b>Sample Name</b>   | Unavailable | <b>Position</b>    | Unavailable | <b>Instrument Name</b> | Unavailable                       | <b>User Name</b>              | Unavailable      |
| <b>Inj Vol</b>       | Unavailable | <b>InjPosition</b> | Unavailable | <b>SampleType</b>      | Unavailable                       | <b>IRM Calibration Status</b> | Some Ions Missed |
| <b>Data Filename</b> | P-90.d      | <b>ACQ Method</b>  |             | <b>Comment</b>         | Sample information is unavailable | <b>Acquired Time</b>          | Unavailable      |

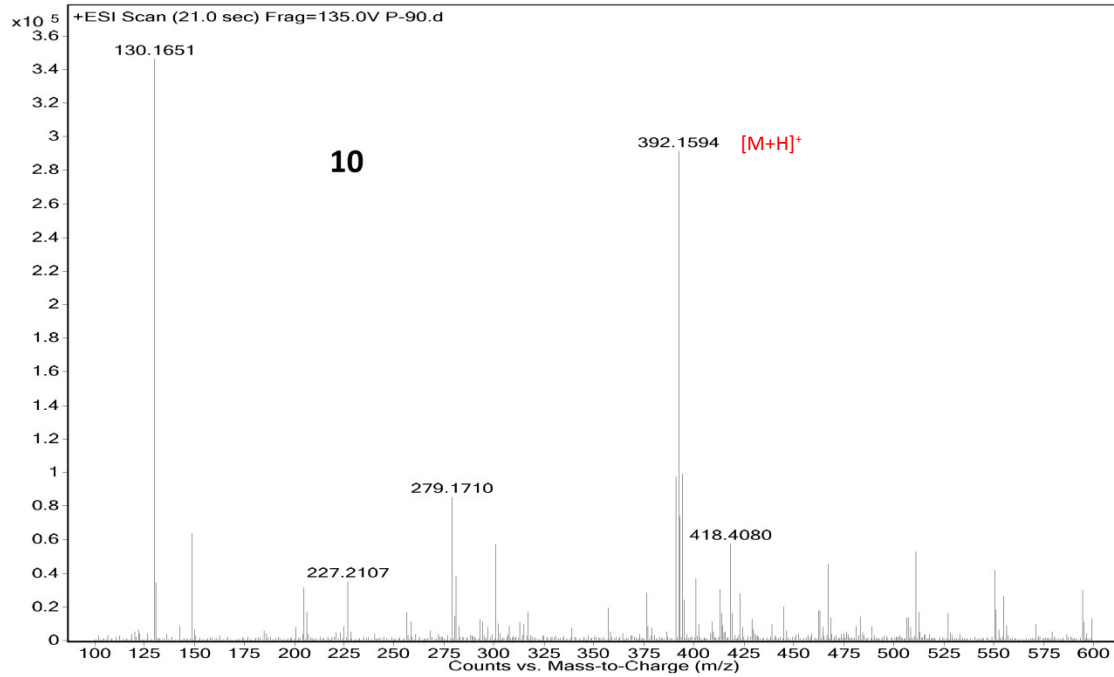

|                      |             |                    |             |                        |                                   |                               |                  |
|----------------------|-------------|--------------------|-------------|------------------------|-----------------------------------|-------------------------------|------------------|
| <b>Sample Name</b>   | Unavailable | <b>Position</b>    | Unavailable | <b>Instrument Name</b> | Unavailable                       | <b>User Name</b>              | Unavailable      |
| <b>Inj Vol</b>       | Unavailable | <b>InjPosition</b> | Unavailable | <b>SampleType</b>      | Unavailable                       | <b>IRM Calibration Status</b> | Some Ions Missed |
| <b>Data Filename</b> | P-91.d      | <b>ACQ Method</b>  |             | <b>Comment</b>         | Sample information is unavailable | <b>Acquired Time</b>          | Unavailable      |

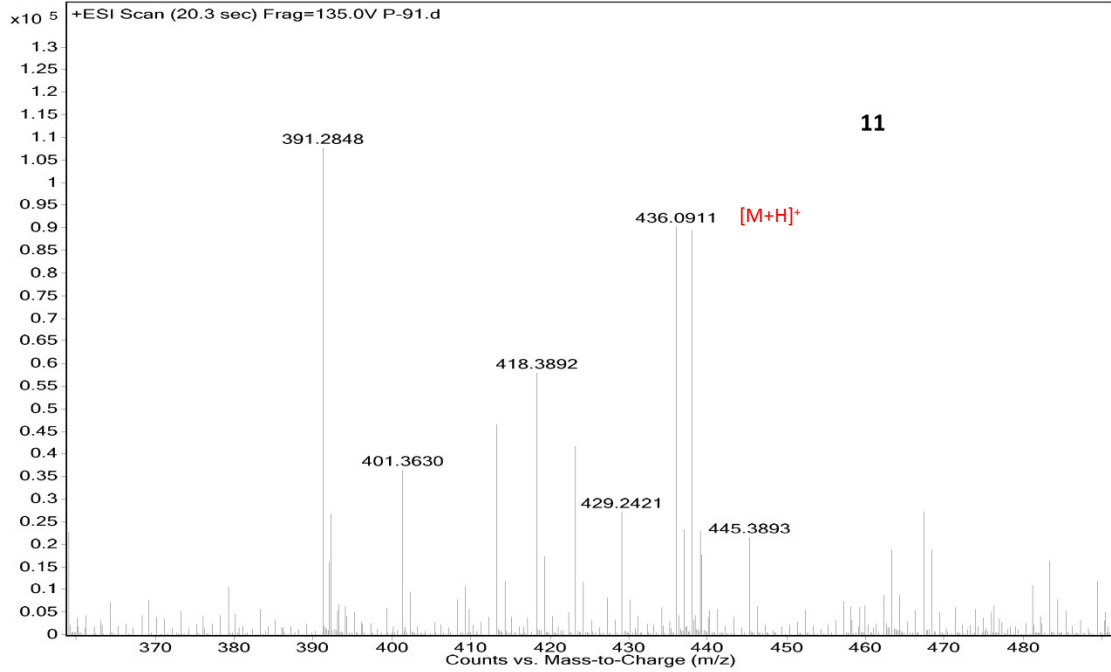

|                      |             |                    |             |                        |                                   |                               |                 |
|----------------------|-------------|--------------------|-------------|------------------------|-----------------------------------|-------------------------------|-----------------|
| <b>Sample Name</b>   | Unavailable | <b>Position</b>    | Unavailable | <b>Instrument Name</b> | Unavailable                       | <b>User Name</b>              | Unavailable     |
| <b>Inj Vol</b>       | Unavailable | <b>InjPosition</b> | Unavailable | <b>SampleType</b>      | Unavailable                       | <b>IRM Calibration Status</b> | All Ions Missed |
| <b>Data Filename</b> | P87.d       | <b>ACQ Method</b>  |             | <b>Comment</b>         | Sample information is unavailable | <b>Acquired Time</b>          | Unavailable     |

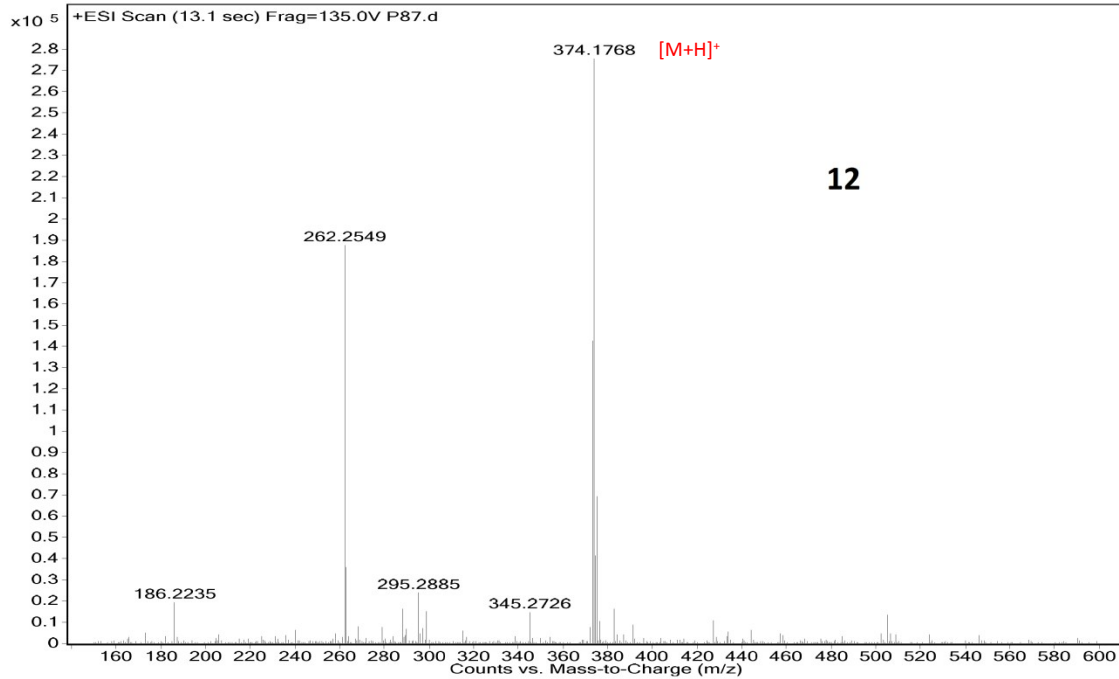

|                      |             |                    |             |                        |                                   |                               |                 |
|----------------------|-------------|--------------------|-------------|------------------------|-----------------------------------|-------------------------------|-----------------|
| <b>Sample Name</b>   | Unavailable | <b>Position</b>    | Unavailable | <b>Instrument Name</b> | Unavailable                       | <b>User Name</b>              | Unavailable     |
| <b>Inj Vol</b>       | Unavailable | <b>InjPosition</b> | Unavailable | <b>SampleType</b>      | Unavailable                       | <b>IRM Calibration Status</b> | All Ions Missed |
| <b>Data Filename</b> | P88.d       | <b>ACQ Method</b>  |             | <b>Comment</b>         | Sample information is unavailable | <b>Acquired Time</b>          | Unavailable     |

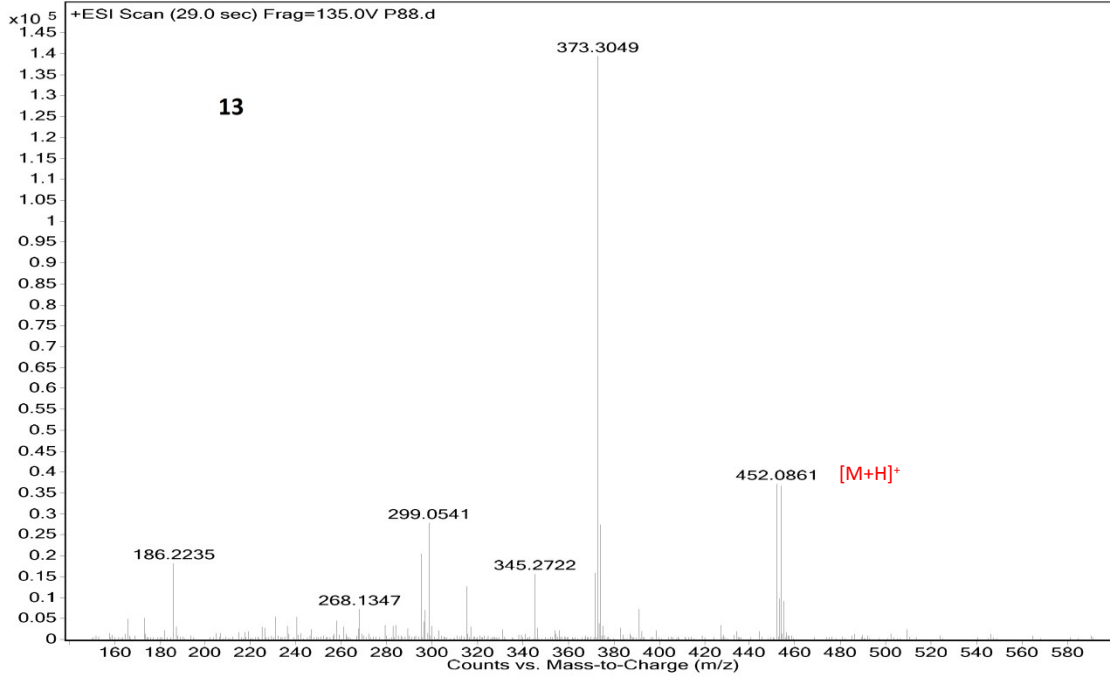

|                      |         |                    |        |                        |              |                               |                      |
|----------------------|---------|--------------------|--------|------------------------|--------------|-------------------------------|----------------------|
| <b>Sample Name</b>   | P93-1   | <b>Position</b>    | Vial 1 | <b>Instrument Name</b> | Instrument 1 | <b>User Name</b>              |                      |
| <b>Inj Vol</b>       | 0       | <b>InjPosition</b> |        | <b>SampleType</b>      | Sample       | <b>IRM Calibration Status</b> | Success              |
| <b>Data Filename</b> | P93-1.d | <b>ACQ Method</b>  |        | <b>Comment</b>         |              | <b>Acquired Time</b>          | 10/9/2017 5:36:13 PM |

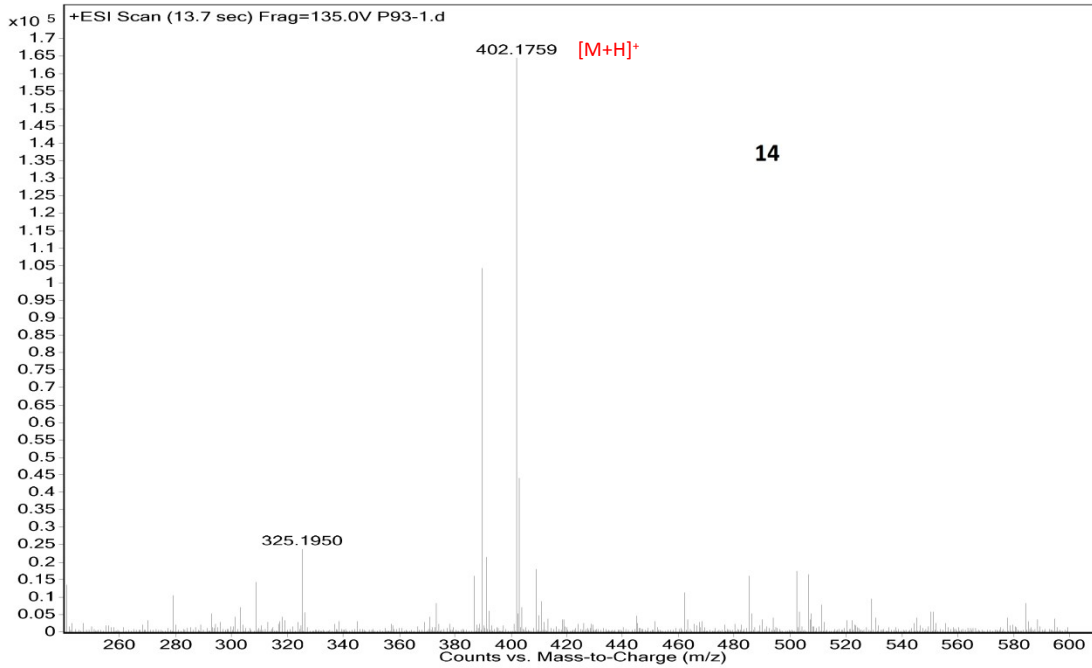

|               |       |             |        |                 |              |                        |                      |
|---------------|-------|-------------|--------|-----------------|--------------|------------------------|----------------------|
| Sample Name   | P92   | Position    | Vial 1 | Instrument Name | Instrument 1 | User Name              |                      |
| Inj Vol       | 0     | InjPosition |        | SampleType      | Sample       | IRM Calibration Status | Success              |
| Data Filename | P92.d | ACQ Method  |        | Comment         |              | Acquired Time          | 10/9/2017 5:32:54 PM |

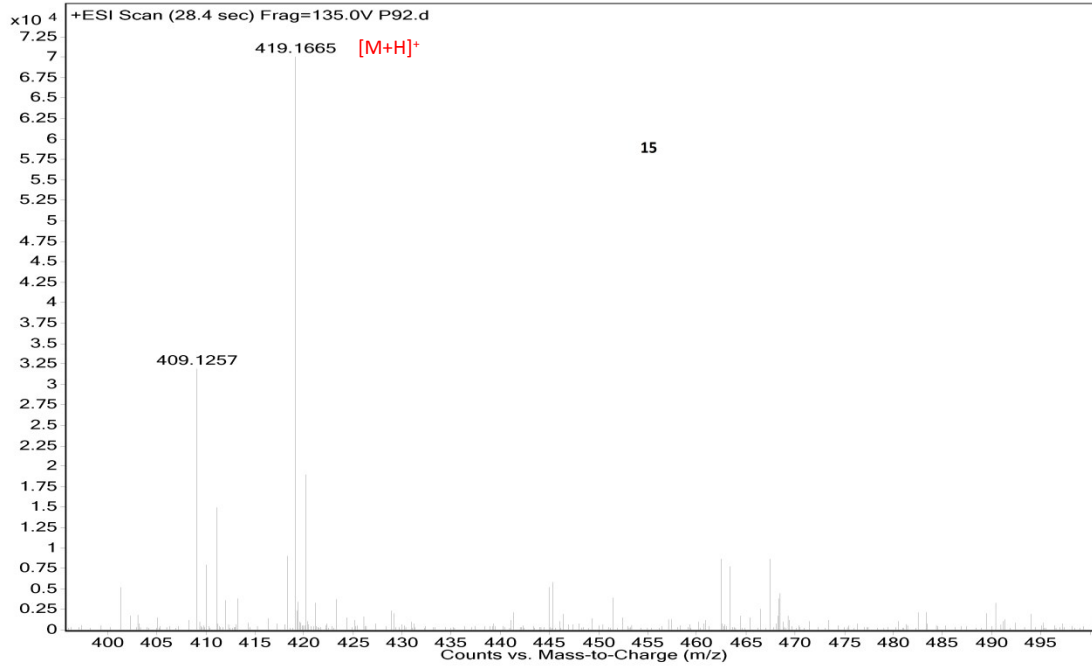

## IR Spectra

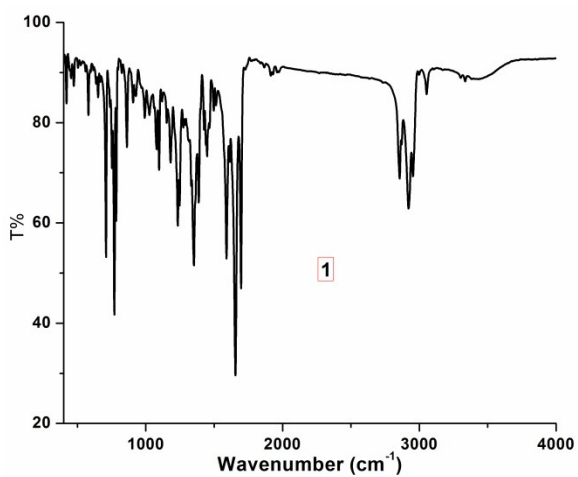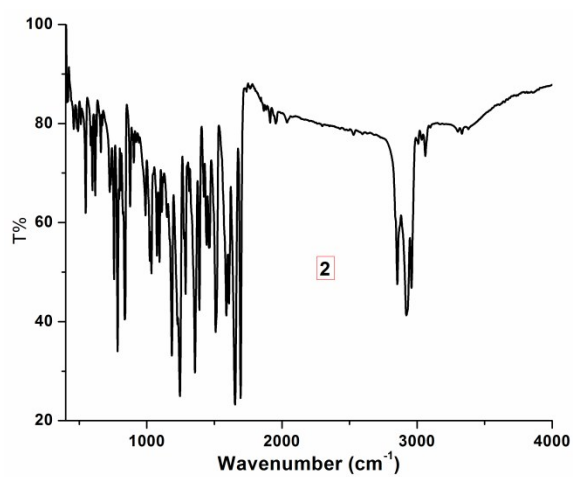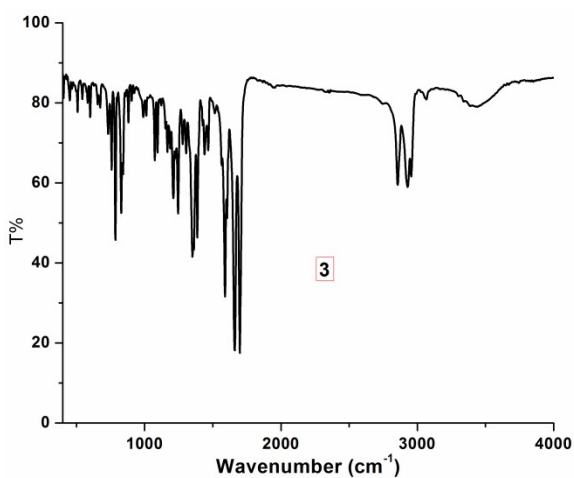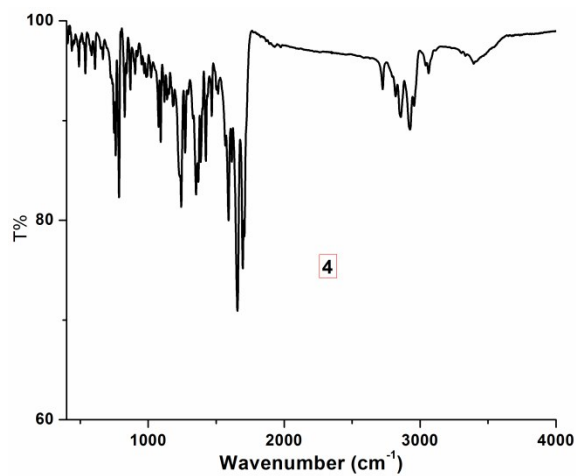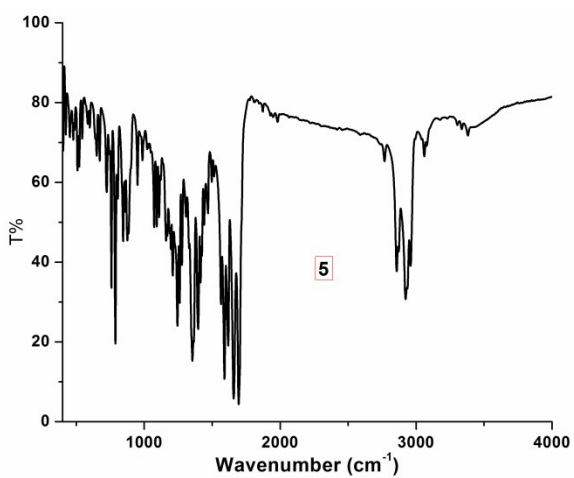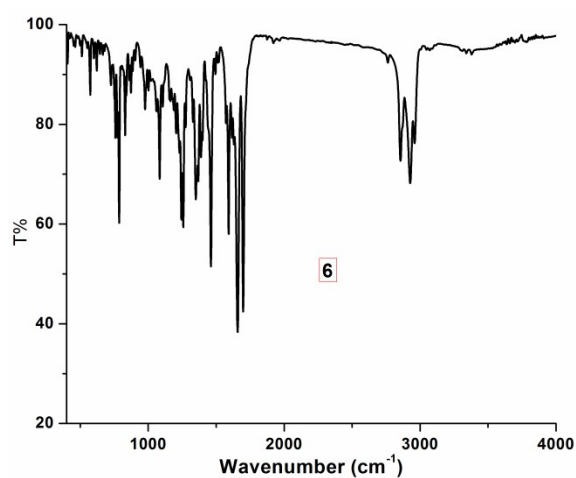

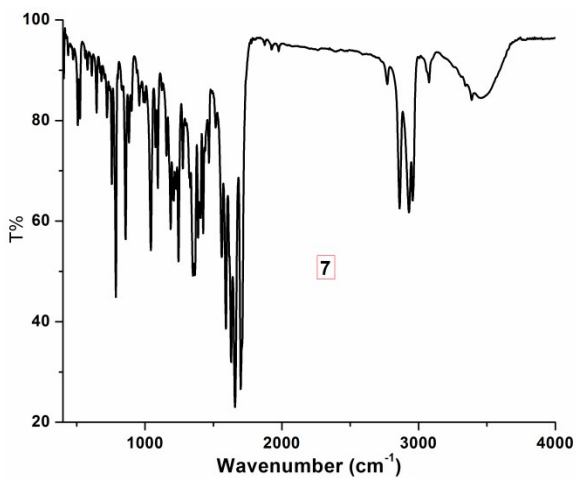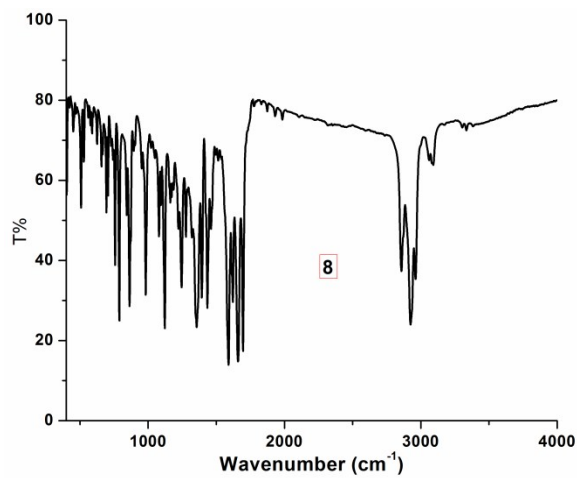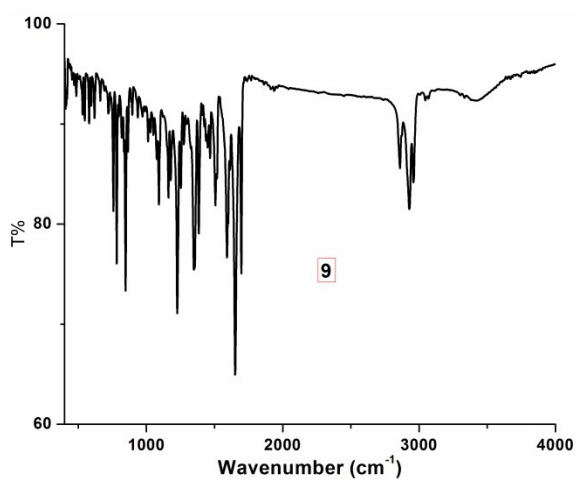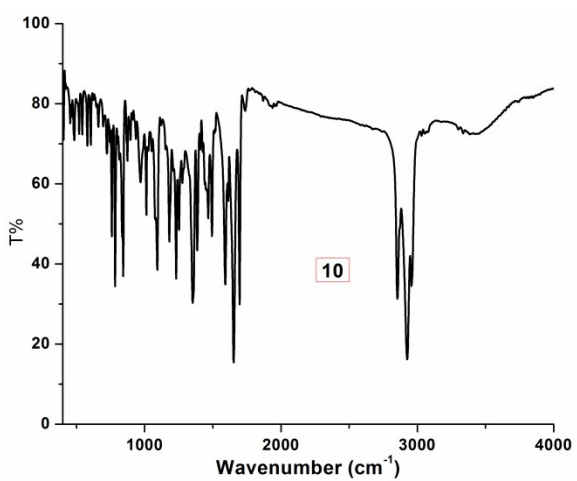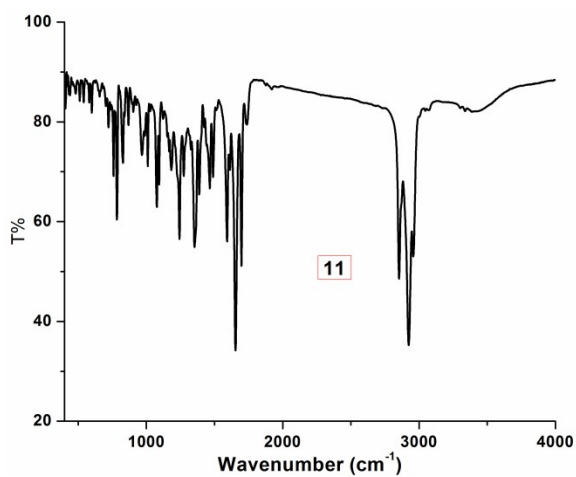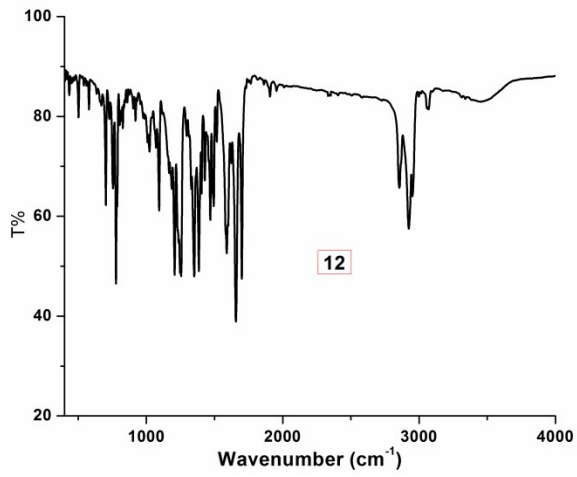

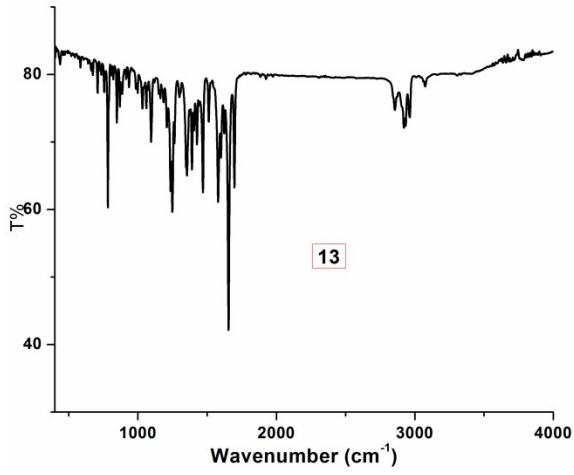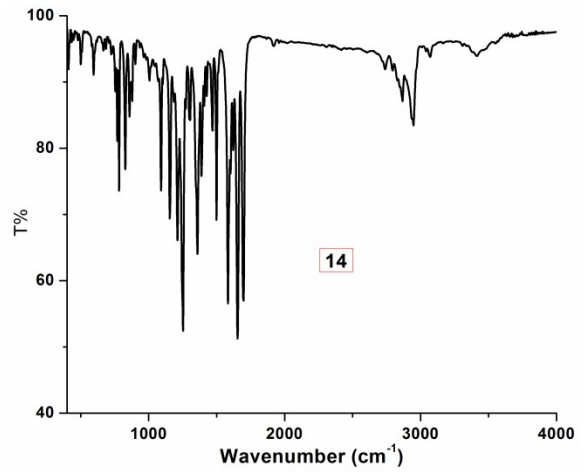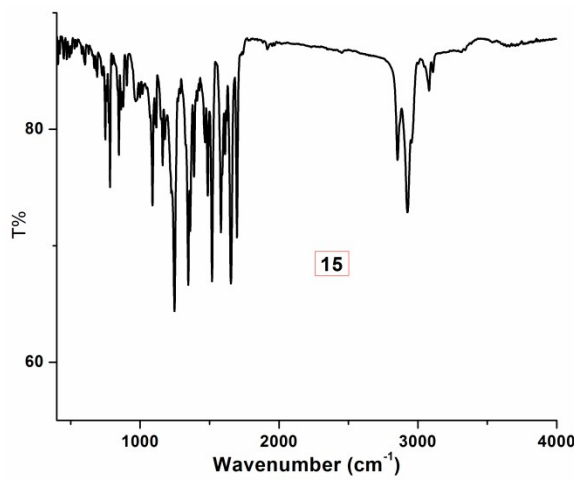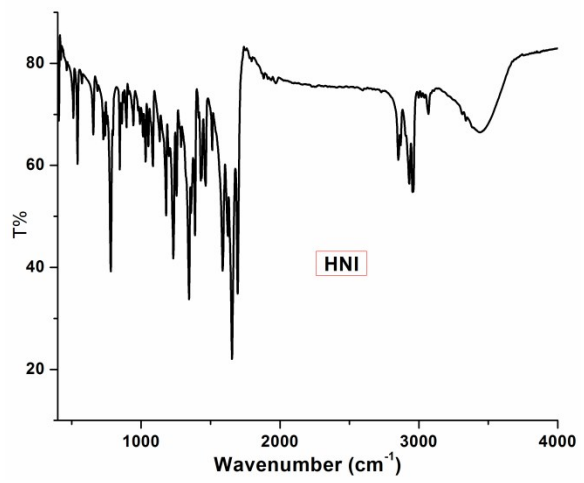

## References

- (1) Becke, A. D. *J. Chem. Phys.* **1993**, *98*, 5648.
- (2) Frisch, M. J.; Trucks, G. W.; Schlegel, H. B.; Scuseria, G. E.; Robb, M. A.; Cheeseman, J. R.; Scalmani, G.; Barone, V.; Mennucci, B.; Petersson, G. A.; Nakatsuji, H.; Caricato, M.; Li, X.; Hratchian, H. P.; Izmaylov, A. F.; Bloino, J.; Zheng, G.; Sonnenberg, J. L.; Hada, M.; Ehara, M.; Toyota, K.; Fukuda, R.; Hasegawa, J.; Ishida, M.; Nakajima, T.; Honda, Y.; Kitao, O.; Nakai, H.; Vreven, T.; Montgomery, J. A., Jr.; Peralta, J. E.; Ogliaro, F.; Bearpark, M.; Heyd, J. J.; Brothers, E.; Kudin, K. N.; Staroverov, V. N.; Kobayashi, R.; Normand, J.; Raghavachari, K.; Rendell, A.; Burant, J. C.; Iyengar, S. S.; Tomasi, J.; Cossi, M.; Rega, N.; Millam, J. M.; Klene, M.; Knox, J. E.; Cross, J. B.; Bakken, V.; Adamo, C.; Jaramillo, J.; Gomperts, R.; Stratmann, R. E.; Yazyev, O.; Austin, A. J.; Cammi, R.; Pomelli, C.; Ochterski, J. W.; Martin, R. L.; Morokuma, K.; Zakrzewski, V. G.; Voth, G. A.; Salvador, P.; Dannenberg, J. J.; Dapprich, S.; Daniels, A. D.; Farkas, O.; Foresman, J. B.; Ortiz, J. V.; Cioslowski, J.; Fox, D. J. *Gaussian 09, Revision A.02*, Gaussian, Inc., Wallingford CT, **2009**.
- (3) (a) Z. Chen, D. Wu, X. Han, Y. Nie, J. Yin, G.-A. Yu, S. H. Liu. (**2014**), CCDC 1014214: Experimental Crystal Structure Determination, Cambridge Crystallographic Data Centre. <http://dx.doi.org/10.5517/cc131cl3>. (b) Z. Chen, D. Wu, X. Han, Y. Nie, J. Yin, G.-A. Yu, S. H. Liu. *RSC Adv.* **2014**, *4*, 63985-63988.
- (4) Sheldrick, G. M. SAINT and XPREP, 5.1 edn, Siemens Industrial Automation Inc., Madison, WI, **1995**.
- (5) Sheldrick, G. M. SHELX97. Program for X-ray Crystal Structure Solution and Refinement, University of Göttingen, Germany, **1997**.
